# Supplementary material
Source: Frontiers journal article supplement (https://www.frontiersin.org/articles/36876)
Supplement: Data_Sheet_1.XLSX [file Data_Sheet_1.XLSX]

## Sheet: Mitochondrial
AGI code	ATH1 probeset	Description	Source
AT1G01090	261583_at	PDH-E1 ALPHA (PYRUVATE DEHYDROGENASE E1 ALPHA); pyruvate dehydrogenase (acetyl-transferring) | chr1:47485-49286 REVERSE	Law et al., 2012
AT1G01170	261572_at	ozone-responsive stress-related protein, putative similar to ATOZI1 (ARABIDOPSIS THALIANA OZONE-INDUCED PROTEIN 1) [Arabidopsis thaliana] (TAIR:AT4G00860.1); similar to unknown [Populus trichocarpa] (GB:ABK93193.1); contains InterPro domain Protein of unknown function DUF1138 (InterPro:IPR009515)	Law et al., 2012
AT1G01290	261044_at	CNX3 (COFACTOR OF NITRATE REDUCTASE AND XANTHINE DEHYDROGENASE 3); catalytic COFACTOR OF NITRATE REDUCTASE AND XANTHINE DEHYDROGENASE 3. Encodes a protein involved in molybdenum cofactor biosynthesis. Homologous to E.coli MoaC. Expression is low in all tissues examined, except in roots. Appears to have targeting signals for chloroplast or mitochondria Identical to Molybdopterin biosynthesis prote…	Law et al., 2012
AT1G02150	264177_at	pentatricopeptide (PPR) repeat-containing protein	Law et al., 2012
AT1G02160	264173_at	similar to unnamed protein product [Vitis vinifera] (GB:CAO70493.1); contains InterPro domain CHCH (InterPro:IPR010625)	Law et al., 2012
AT1G02370	259444_at	pentatricopeptide (PPR) repeat-containing protein	Law et al., 2012
AT1G02410	259446_at	cytochrome c oxidase assembly protein CtaG / Cox11 family / Involved in COX biogenesis	Law et al., 2012
AT1G02820	262113_at	late embryogenesis abundant 3 family protein / LEA3 family protein similar to SAG21 (SENESCENCE-ASSOCIATED GENE 21) [Arabidopsis thaliana] (TAIR:AT4G02380.1); similar to late embryogenis abundant protein 5 [Nicotiana tabacum] (GB:AAC06242.1); contains InterPro domain Late embryogenesis abundant protein 3; (InterPro:IPR004926)	Law et al., 2012
AT1G02870	262112_at	similar to unnamed protein product [Vitis vinifera] (GB:CAO39998.1); contains domain PD099709 (PD099709)	Law et al., 2012
AT1G02930	262119_s_at	ATGSTF6 (EARLY RESPONSIVE TO DEHYDRATION 11); glutathione transferase	Law et al., 2012
AT1G02940	262103_at	ATGSTF5 (Arabidopsis thaliana Glutathione S-transferase (class phi) 5); glutathione transferase Encodes glutathione transferase belonging to the phi class of GSTs. Naming convention according to Wagner et al. (2002). similar to ATGSTF4 (GLUTATHIONE S-TRANSFERASE 31), glutathione transferase [Arabidopsis thaliana] (TAIR:AT1G02950.3); similar to ATGSTF4 (GLUTATHIONE S-TRANSFERASE 31), glutathione t…	Law et al., 2012
AT1G03090	263118_at	MCCA (3-methylcrotonyl-CoA carboxylase 1) MCCA is the biotinylated subunit of the dimer MCCase, which is involved in leucine degradation. Both subunits are nuclear coded and the active enzyme is located in the mitochondrion. Identical to Methylcrotonoyl-CoA carboxylase subunit alpha, mitochondrial precursor (MCCA) [Arabidopsis Thaliana] (GB:Q42523;GB:Q9SA61); similar to CAC2 (acetyl co-enzyme A c…	Law et al., 2012
AT1G03100	263143_at	pentatricopeptide (PPR) repeat-containing protein	Law et al., 2012
AT1G03380	264828_at	AtATG18g (Arabidopsis thaliana homolog of yeast autophagy 18 (ATG18) g) similar to AtATG18h (Arabidopsis thaliana homolog of yeast autophagy 18 (ATG18) h) [Arabidopsis thaliana] (TAIR:AT1G54710.1); similar to hypothetical protein [Vitis vinifera] (GB:CAN64435.1); similar to unnamed protein product [Vitis vinifera] (GB:CAO22449.1); similar to hypothetical protein [Vitis vinifera] (GB:CAN80611.1); …	Law et al., 2012
AT1G03540	264817_at	pentatricopeptide (PPR) repeat-containing protein	Law et al., 2012
AT1G03560	264816_at	pentatricopeptide (PPR) repeat-containing protein similar to EMB2745 (EMBRYO DEFECTIVE 2745)	Law et al., 2012
AT1G03860	265037_at	prohibitin 2	Law et al., 2012
AT1G04070	265041_at	TOM22-I (translocase of the outer mitochondrial membrane 22-I)	Law et al., 2012
AT1G04480	263665_at	60S ribosomal protein L23 (RPL23A) Identical to 60S ribosomal protein L23 (RPL23C) [Arabidopsis Thaliana] (GB:P49690;GB:Q8L8P0;GB:Q9SDB5); similar to EMB2171 (EMBRYO DEFECTIVE 2171), structural constituent of ribosome [Arabidopsis thaliana] (TAIR:AT3G04400.1); similar to 60S ribosomal protein L23 (RPL23B) [Arabidopsis thaliana] (TAIR:AT2G33370.1); similar to ribosomal protein L17 [Castanea sativa…	Law et al., 2012
AT1G04900	261124_at	similar to hypothetical protein OsJ_004408 [Oryza sativa (japonica cultivar-group)] (GB:EAZ14583.1); contains InterPro domain Protein of unknown function DUF185 (InterPro:IPR003788)	Law et al., 2012
AT1G04985	261179_at	similar to unnamed protein product [Vitis vinifera] (GB:CAO24071.1)	Law et al., 2012
AT1G05270	264566_at	TraB family protein	Law et al., 2012
AT1G05600	263200_at	pentatricopeptide (PPR) repeat-containing protein	Law et al., 2012
AT1G06020	260947_at	pfkB-type carbohydrate kinase family protein	Law et al., 2012
AT1G06030,AT1G50390	262460_s_at	) pfkB-type carbohydrate kinase family protein	Law et al., 2012
AT1G06140	260952_at	pentatricopeptide (PPR) repeat-containing protein similar to EMB2758 (EMBRYO DEFECTIVE 2758)	Law et al., 2012
AT1G06270	260792_at	pentatricopeptide (PPR) repeat-containing protein	Law et al., 2012
AT1G06530	262621_at	myosin heavy chain-related	Law et al., 2012
AT1G06570	262635_at	PDS1 (PHYTOENE DESATURATION 1) Mutation of the PDS1 locus disrupts the activity of p-hydroxyphenylpyruvate dioxygenase (HPPDase), the first committed step in the synthesis of both plastoquinone and tocopherols in plants. Identical to 4-hydroxyphenylpyruvate dioxygenase (HPD) [Arabidopsis Thaliana] (GB:P93836;GB:O04330;GB:Q9SHK1); similar to hypothetical protein [Vitis vinifera] (GB:CAN71143.1); s…	Law et al., 2012
AT1G06580	262627_at	pentatricopeptide (PPR) repeat-containing protein	Law et al., 2012
AT1G07025	256048_at	Mitochondrial substrate carrier family protein; FUNCTIONS IN: binding; INVOLVED IN: transport, mitochondrial transport, transmembrane transport; LOCATED IN: mitochondrial inner membrane, membrane; CONTAINS InterPro DOMAIN/s: Mitochondrial substrate carrier (InterPro:IPR001993), Mitochondrial substrate/solute carrier (InterPro:IPR018108); BEST Arabidopsis thaliana protein match is: Mitochondrial s…	Law et al., 2012
AT1G07030	256055_at	Mitochondrial substrate carrier family protein; FUNCTIONS IN: binding; INVOLVED IN: transport, mitochondrial transport, transmembrane transport; LOCATED IN: mitochondrial inner membrane, membrane; EXPRESSED IN: 20 plant structures; EXPRESSED DURING: 15 growth stages; CONTAINS InterPro DOMAIN/s: Mitochondrial carrier protein (InterPro:IPR002067), Mitochondrial substrate carrier (InterPro:IPR001993…	Law et al., 2012
AT1G07110	256036_at	ATF2KP, FKFBP | F2KP (FRUCTOSE-2,6-BISPHOSPHATASE); fructose-2,6-bisphosphate 2-phosphatase	Law et al., 2012
AT1G07180	256057_at	ATNDI1/NDA1 (ALTERNATIVE NAD(P)H DEHYDROGENASE 1); NADH dehydrogenase	Law et al., 2012
AT1G07210	256043_at	30S ribosomal protein S18	Law et al., 2012
AT1G07220	256042_at	similar to unknown protein [Arabidopsis thaliana] (TAIR:AT5G23850.1); similar to hypothetical protein [Vitis vinifera] (GB:CAN70836.1); contains InterPro domain Protein of unknown function DUF821, CAP10-like (InterPro:IPR008539); contains InterPro domain Lipopolysaccharide-modifying protein (InterPro:IPR006598)	Law et al., 2012
AT1G07320	261078_at	50S ribosomal protein L4	Law et al., 2012
AT1G07510	261064_at	FTSH10 (FtsH protease 10); ATPase encodes an FtsH protease that is localized to the mitochondrion similar to FTSH3 (FtsH protease 3), ATP-dependent peptidase/ ATPase [Arabidopsis thaliana] (TAIR:AT2G29080.1); similar to hypothetical protein OsI_019542 [Oryza sativa (indica cultivar-group)] (GB:EAY98309.1); similar to AAA-metalloprotease FtsH [Pisum sativum] (GB:AAK77908.1); similar to unnamed pro…	Law et al., 2012
AT1G07590	261088_at	pentatricopeptide (PPR) repeat-containing protein similar to DNA binding	Law et al., 2012
AT1G07740	261463_at	pentatricopeptide (PPR) repeat-containing protein	Law et al., 2012
AT1G07830	261418_at	ribosomal protein L29 family protein similar to unknown [Populus trichocarpa] (GB:ABK93723.1); contains InterPro domain Ribosomal protein L47, mitochondrial; (InterPro:IPR010729); contains InterPro domain Ribosomal protein L29; (InterPro:IPR001854)	Law et al., 2012
AT1G07940	247644_s_at	elongation factor 1-alpha / EF-1-alpha Identical to Elongation factor 1-alpha (A4) [Arabidopsis Thaliana] (GB:P13905); similar to elongation factor 1-alpha / EF-1-alpha [Arabidopsis thaliana] (TAIR:AT5G60390.1); similar to elongation factor 1-alpha / EF-1-alpha [Arabidopsis thaliana] (TAIR:AT1G07920.1); similar to elongation factor 1-alpha / EF-1-alpha [Arabidopsis thaliana] (TAIR:AT5G60390.3); s…	Law et al., 2012
AT1G08130	261810_at	ATLIG1 (ARABIDOPSIS THALIANA DNA LIGASE 1); ATP binding / DNA ligase (ATP) Encodes the Arabidopsis DNA ligase 1 that provides the major DNA ligase activity in cells and plays a key role in both DNA replication and excision repair pathways. Indispensable for cell viability. AtLIG1 expresses one major and two minor mRNA transcripts differing only in the length of the 5' untranslated leader sequence…	Law et al., 2012
AT1G08220	261784_at	Unknown function	Law et al., 2012
AT1G08480	261721_at	Succinate dehydrogenase subunit 6	Law et al., 2012
AT1G08650	264783_at	PPCK1 (PHOSPHOENOLPYRUVATE CARBOXYLASE KINASE); kinase/ protein serine/threonine kinase	Law et al., 2012
AT1G08940	264645_at	phosphoglycerate/bisphosphoglycerate mutase family protein	Law et al., 2012
AT1G09130	264641_at	ATP-dependent Clp protease proteolytic subunit, putative Identical to ATP-dependent Clp protease proteolytic subunit-related protein 3, chloroplast precursor (CLPR3) [Arabidopsis Thaliana] (GB:Q8L770;GB:O04018;GB:Q67XY5;GB:Q680D2); similar to CLPR1 (Clp protease proteolytic subunit 5), endopeptidase Clp [Arabidopsis thaliana] (TAIR:AT1G49970.1); similar to unnamed protein product [Vitis vinifera]…	Law et al., 2012
AT1G09210	264260_at	calreticulin 2 (CRT2) Identical to Calreticulin-2 precursor (CRT2) [Arabidopsis Thaliana] (GB:Q38858;GB:O04152;GB:O80486;GB:Q94AW7); similar to CRT1 (CALRETICULIN 1), calcium ion binding [Arabidopsis thaliana] (TAIR:AT1G56340.2); similar to CRT1 (CALRETICULIN 1), calcium ion binding [Arabidopsis thaliana] (TAIR:AT1G56340.1); similar to Calreticulin precursor (GB:P93508); contains InterPro domain …	Law et al., 2012
AT1G09300	263707_at	metallopeptidase M24 family protein similar to X-Pro dipeptidase [Arabidopsis thaliana] (TAIR:AT4G29490.1); similar to unnamed protein product [Vitis vinifera] (GB:CAO17407.1); contains InterPro domain Peptidase M24, catalytic core; (InterPro:IPR000994); contains InterPro domain Peptidase M24B, X-Pro dipeptidase/aminopeptidase P N-terminal; (InterPro:IPR007865); contains InterPro domain Peptidase…	Law et al., 2012
AT1G09410	264503_at	pentatricopeptide (PPR) repeat-containing protein	Law et al., 2012
AT1G09430	264504_at	ACLA-3 | ACLA-3; ATP citrate synthase | chr1:3041996-3045402 FORWARD	Law et al., 2012
AT1G09680	264666_at	pentatricopeptide (PPR) repeat-containing protein similar to EMB2745 (EMBRYO DEFECTIVE 2745)	Law et al., 2012
AT1G09780	264668_at	2,3-biphosphoglycerate-independent phosphoglycerate mutase, putative / phosphoglyceromutase, putative	Law et al., 2012
AT1G09820	264713_at	pentatricopeptide (PPR) repeat-containing protein similar to EMB2745 (EMBRYO DEFECTIVE 2745)	Law et al., 2012
AT1G09940	264660_at	HEMA2; glutamyl-tRNA reductase	Law et al., 2012
AT1G10060	264525_at	ATBCAT-1; branched-chain-amino-acid transaminase/ catalytic encodes a mitochondrial branched-chain amino acid aminotransferase. Complements the yeast leu/iso-leu/val auxotrophy mutant. Identical to Branched-chain-amino-acid aminotransferase 1, mitochondrial precursor (BCAT1) [Arabidopsis Thaliana] (GB:Q93Y32;GB:O80597); similar to ATBCAT-2, catalytic [Arabidopsis thaliana] (TAIR:AT1G10070.2); sim…	Law et al., 2012
AT1G10150	264463_at	ATPP2-A10 (Phloem protein 2-A10); carbohydrate binding Identical to Protein PHLOEM PROTEIN 2-LIKE A10 (PP2A10) [Arabidopsis Thaliana] (GB:Q9SY57;GB:Q8LCL9); similar to CF9 [Arabidopsis thaliana] (TAIR:AT1G59510.1); similar to hypothetical protein [Vitis vinifera] (GB:CAN77737.1); contains domain PTHR21477:SF2 (PTHR21477:SF2); contains domain PTHR21477 (PTHR21477)	Law et al., 2012
AT1G10270	264452_at	GRP23 (GLUTAMINE-RICH PROTEIN23); binding similar to EMB1796 (EMBRYO DEFECTIVE 1796),	Law et al., 2012
AT1G10670	261833_at	ACLA-1 | ACLA-1; ATP citrate synthase | chr1:3535387-3538281 FORWARD	Law et al., 2012
AT1G10760	262784_at	SEX1 (STARCH EXCESS 1) Encodes an &#945;-glucan, water dikinase required for starch degradation. Involved in cold-induced freezing tolerance. Mutations that eliminate the GWD protein or affect the dikinase domain of the enzyme dramatically reduce both the amount of phosphate in the amylopectin and the rate of starch degradation. Mature leaves of these mutants accumulate amounts of starch up to se…	Law et al., 2012
AT1G11630	262822_at	pentatricopeptide (PPR) repeat-containing protein similar to PPR336 (PENTATRICOPEPTIDE REPEAT 336)	Law et al., 2012
AT1G11710	262810_at	pentatricopeptide (PPR) repeat-containing protein	Law et al., 2012
AT1G11860	264394_at	aminomethyltransferase, putative	Law et al., 2012
AT1G11870	264350_at	AtSRS (OVULE ABORTION 7); serine-tRNA ligase Seryl-tRNA synthetase targeted to chloroplasts and mitochondria. Its inactivation causes developmental arrest of chloroplasts and mitochondria in Nicotiana benthamiana. similar to seryl-tRNA synthetase / serine--tRNA ligase [Arabidopsis thaliana] (TAIR:AT5G27470.1); similar to seryl-tRNA synthetase [Zea mays] (GB:CAA73496.1); similar to Os11g0610900 [O…	Law et al., 2012
AT1G12000	264386_at	pyrophosphate--fructose-6-phosphate 1-phosphotransferase beta subunit, putative / pyrophosphate-dependent 6-phosphofructose-1-kinase, putative	Law et al., 2012
AT1G12620	255938_at	pentatricopeptide (PPR) repeat-containing protein	Law et al., 2012
AT1G12700	255935_at	helicase domain-containing protein / pentatricopeptide (PPR) repeat-containing protein	Law et al., 2012
AT1G13040	257465_at	pentatricopeptide (PPR) repeat-containing protein	Law et al., 2012
AT1G13440	259361_at	GAPC2 (GLYCERALDEHYDE-3-PHOSPHATE DEHYDROGENASE C2); NAD or NADH binding / binding / catalytic/ glyceraldehyde-3-phosphate dehydrogenase (phosphorylating)	Law et al., 2012
AT1G13800	259449_at	pentatricopeptide (PPR) repeat-containing protein	Law et al., 2012
AT1G14140	262610_at	Mitochondrial substrate carrier family protein; FUNCTIONS IN: transporter activity, binding; INVOLVED IN: transport, mitochondrial transport, transmembrane transport; LOCATED IN: mitochondrial inner membrane, membrane; EXPRESSED IN: 21 plant structures; EXPRESSED DURING: 13 growth stages; CONTAINS InterPro DOMAIN/s: Mitochondrial substrate carrier (InterPro:IPR001993), Mitochondrial substrate/sol…	Law et al., 2012
AT1G14270	261483_at	CAAX amino terminal protease family protein similar to CAAX amino terminal protease family protein [Arabidopsis thaliana] (TAIR:AT5G60750.1); similar to unnamed protein product [Vitis vinifera] (GB:CAO48394.1); contains InterPro domain Abortive infection protein (InterPro:IPR003675)	Law et al., 2012
AT1G14410	261493_at	Encodes a homolog of the potato p24 protein. Binds single strand telomeric repeats. Negatively regulates telomerase activity and telomere length.	Law et al., 2012
AT1G14450	261489_at		Law et al., 2012
AT1G14560	260777_at	Mitochondrial substrate carrier family protein; FUNCTIONS IN: binding, transporter activity; INVOLVED IN: transport, mitochondrial transport, transmembrane transport; LOCATED IN: endomembrane system, mitochondrial inner membrane, membrane; EXPRESSED IN: 24 plant structures; EXPRESSED DURING: 14 growth stages; CONTAINS InterPro DOMAIN/s: Mitochondrial carrier protein (InterPro:IPR002067), Mitochon…	Law et al., 2012
AT1G14610	260780_at	TWN2 (TWIN 2); ATP binding / aminoacyl-tRNA ligase Required for proper proliferation of basal cells. Identical to Valyl-tRNA synthetase (VALRS) [Arabidopsis Thaliana] (GB:P93736;GB:Q8W4A8;GB:Q9MA22); similar to EMB2247 (EMBRYO DEFECTIVE 2247), ATP binding / aminoacyl-tRNA ligase [Arabidopsis thaliana] (TAIR:AT5G16715.1); similar to Valyl-tRNA synthetase, putative [Oryza sativa (japonica cultivar-…	Law et al., 2012
AT1G14620	260781_at	DECOY (endoxyloglucan transferase A2)	Law et al., 2012
AT1G14810	262841_at	semialdehyde dehydrogenase family protein encodes an aspartate semialdehyde dehydrogenase, which produces the branch point intermediate for lysine and threonine/methionine biosynthesis similar to unnamed protein product [Vitis vinifera] (GB:CAO42370.1); contains InterPro domain NAD(P)-binding; (InterPro:IPR016040); contains InterPro domain Aspartate-semialdehyde dehydrogenase; (InterPro:IPR012080…	Law et al., 2012
AT1G14830	262837_at	ADL1C/ADL5 (DYNAMIN-LIKE PROTEIN 5); GTP binding / GTPase Encodes a dynamin-like protein that is involved in mitochondrial morphogenesis and pollen development. Protein is localized as speckles in the cytoplasm, partially co-localizes with mitochondrial markers, cell plate of dividing cells, and the tip of root hairs, root cap cells, and expanding part of trichoblasts. Identical to Dynamin-relate…	Law et al., 2012
AT1G14980	260714_at	CPN10 (CHAPERONIN 10)	Law et al., 2012
AT1G15120	262593_at	7.8 kDa protein	Law et al., 2012
AT1G15220	262591_at	ATCCMH; oxidoreductase Encodes a protein with oxidoreductase activity present in the inner membrane of mitochondria. CCMH is postulated to play a central role in mitochondrial cytochrome c maturation, probably as part of a heme lyase complex that also holds activity of reducing apocytochrome c. CCMH interacts with apocytochrome AtCYTc-a and is shown to be present in a 500 kDa-complex along with C…	Law et al., 2012
AT1G15260	262598_at	similar to unknown protein [Arabidopsis thaliana] (TAIR:AT3G16070.1)	Law et al., 2012
AT1G15390	262573_at	PDF1A (PEPTIDE DEFORMYLASE 1A); peptide deformylase encodes a peptide deformylase-like protein. Removes N-formyl groups, a prerequisite for the action of methionine aminopeptidase during protein synthesis. Targeted to mitochondria. Requires Zn for catalysis. Identical to Peptide deformylase, mitochondrial precursor (PDF1A) [Arabidopsis Thaliana] (GB:Q9FV53;GB:Q9XI30); similar to PDF1B (PEPTIDE DE…	Law et al., 2012
AT1G15690	259504_at	AVP1 (vacuolar-type H+-pumping pyrophosphatase 1); ATPase Encodes a H(+)-translocating (pyrophosphate-energized) inorganic pyrophosphatase (H(+)-PPase; EC 3.6.1.1) located in the vacuolar membrane. Expression is found in all tissues examined, including meristems and floral organ primordium. Expression is particularly enhanced in pollen, and is repressed by light. Over expression and loss of funct…	Law et al., 2012
AT1G15810	259505_at	30S ribosomal protein S15	Law et al., 2012
AT1G16510	262703_at	auxin-responsive family protein similar to auxin-responsive family protein [Arabidopsis thaliana] (TAIR:AT1G79130.1); similar to unnamed protein product [Vitis vinifera] (GB:CAO47913.1); contains InterPro domain Auxin responsive SAUR protein (InterPro:IPR003676)	Law et al., 2012
AT1G16700	264097_s_at		Law et al., 2012
AT1G16740	255767_at	50S ribosomal protein L20	Law et al., 2012
AT1G16870	256106_at	mitochondrial 28S ribosomal protein S29-related similar to unnamed protein product [Vitis vinifera] (GB:CAO21353.1); similar to Os07g0202900 [Oryza sativa (japonica cultivar-group)] (GB:NP_001059138.1); contains domain PTHR12810 (PTHR12810)	Law et al., 2012
AT1G17350	261087_at	auxin-induced-related / indole-3-acetic acid induced-related Identical to Probable complex I intermediate-associated protein 30 [Arabidopsis Thaliana] (GB:Q9LQI7); similar to unknown protein [Arabidopsis thaliana] (TAIR:AT1G72420.1); similar to hypothetical protein [Vitis vinifera] (GB:CAN61795.1); contains InterPro domain NADH:ubiquinone oxidoreductase complex I intermediate-associated protein 3…	Law et al., 2012
AT1G17530	260687_at	ATTIM23-1 (TRANSLOCASE OF INNER MITOCHONDRIAL MEMBRANE 23); P-P-bond-hydrolysis-driven protein transmembrane transporter	Law et al., 2012
AT1G17630	260736_at	pentatricopeptide (PPR) repeat-containing protein	Law et al., 2012
AT1G17960	255893_at	threonyl-tRNA synthetase, putative / threonine--tRNA ligase, putative Identical to Probable threonyl-tRNA synthetase, cytoplasmic [Arabidopsis Thaliana] (GB:Q8GZ45;GB:Q9LMT4); similar to threonyl-tRNA synthetase / threonine--tRNA ligase (THRRS) [Arabidopsis thaliana] (TAIR:AT5G26830.1); similar to unnamed protein product [Vitis vinifera] (GB:CAO45124.1); contains InterPro domain Aminoacyl-tRNA sy…	Law et al., 2012
AT1G18130	256120_at	tRNA synthetase-related / tRNA ligase-related similar to threonyl-tRNA synthetase / threonine--tRNA ligase (THRRS) [Arabidopsis thaliana] (TAIR:AT5G26830.1); similar to unnamed protein product [Vitis vinifera] (GB:CAO40920.1); contains InterPro domain Anticodon-binding; (InterPro:IPR004154); contains InterPro domain Threonyl-tRNA synthetase, class IIa; (InterPro:IPR002320)	Law et al., 2012
AT1G18320,AT3G10110	261664_s_at	0, mitochondrial import inner membrane translocase subunit Tim17/Tim22/Tim23 family protein];[AT3G10110, MEE67 (maternal effect embryo arrest 67); P-P-bond-hydrolysis-driven protein transmembrane transporter]	Law et al., 2012
AT1G18600	255775_at	rhomboid family protein similar to rhomboid family protein [Arabidopsis thaliana] (TAIR:AT1G74130.1); similar to unnamed protein product [Vitis vinifera] (GB:CAO62451.1); contains InterPro domain Peptidase S54, rhomboid; (InterPro:IPR002610)	Law et al., 2012
AT1G18900	259461_at	pentatricopeptide (PPR) repeat-containing protein	Law et al., 2012
AT1G19140	259475_at	similar to unnamed protein product [Vitis vinifera] (GB:CAO65215.1); contains InterPro domain Ubiquinone biosynthesis protein COQ9; (InterPro:IPR012762); contains InterPro domain COQ9 (InterPro:IPR013718)	Law et al., 2012
AT1G19520	260663_at	NFD5 (NUCLEAR FUSION DEFECTIVE 5); transcription factor similar to pentatricopeptide (PPR) repeat-containing protein	Law et al., 2012
AT1G19520	260670_at	NFD5 (NUCLEAR FUSION DEFECTIVE 5); transcription factor similar to pentatricopeptide (PPR) repeat-containing protein	Law et al., 2012
AT1G19580	261148_at		Law et al., 2012
AT1G20300	255888_at	pentatricopeptide (PPR) repeat-containing protein	Law et al., 2012
AT1G20350	255941_at	ATTIM17-1 (Arabidopsis thaliana translocase inner membrane subunit 17-1); P-P-bond-hydrolysis-driven protein transmembrane transporter	Law et al., 2012
AT1G20430	259515_at	similar to unknown [Populus trichocarpa] (GB:ABK94921.1)	Law et al., 2012
AT1G20620	259544_at	CAT3 (CATALASE 3); catalase	Law et al., 2012
AT1G20950	262806_at	pyrophosphate--fructose-6-phosphate 1-phosphotransferase-related / pyrophosphate-dependent 6-phosphofructose-1-kinase-related	Law et al., 2012
AT1G21400	260900_s_at	2-oxoisovalerate dehydrogenase, putative / 3-methyl-2-oxobutanoate dehydrogenase, putative / branched-chain alpha-keto acid dehydrogenase E1 alpha subunit, putative	Law et al., 2012
AT1G22170	255924_at	phosphoglycerate/bisphosphoglycerate mutase family protein	Law et al., 2012
AT1G22450	261939_at	Cytochrome c oxidase subunit 6b	Law et al., 2012
AT1G22520	261940_at	similar to unknown protein [Arabidopsis thaliana] (TAIR:AT1G72170.1); similar to unknown [Populus trichocarpa] (GB:ABK94376.1); contains InterPro domain Protein of unknown function DUF543 (InterPro:IPR007512)	Law et al., 2012
AT1G22660	264212_at	tRNA-nucleotidyltransferase, putative / tRNA adenylyltransferase, putative similar to polynucleotide adenylyltransferase family protein [Arabidopsis thaliana] (TAIR:AT2G17580.1); similar to unnamed protein product [Vitis vinifera] (GB:CAO49617.1); contains InterPro domain Polynucleotide adenylyltransferase region; (InterPro:IPR002646)	Law et al., 2012
AT1G22800	264198_at	methyltransferase Identical to Uncharacterized protein At1g22800 [Arabidopsis Thaliana] (GB:O80543;GB:Q84MB4); similar to unnamed protein product [Vitis vinifera] (GB:CAO16311.1); contains InterPro domain Methyltransferase type 11; (InterPro:IPR013216)	Law et al., 2012
AT1G22830	264749_at	pentatricopeptide (PPR) repeat-containing protein	Law et al., 2012
AT1G22840	264727_at	ATCYTC-A/CYTC-1 (CYTOCHROME C-1); electron carrier	Law et al., 2012
AT1G22960	264723_at	pentatricopeptide (PPR) repeat-containing protein similar to EMB2745 (EMBRYO DEFECTIVE 2745)	Law et al., 2012
AT1G23100	264895_at	10 kDa chaperonin, putative	Law et al., 2012
AT1G23190	264903_at	phosphoglucomutase, cytoplasmic, putative / glucose phosphomutase, putative	Law et al., 2012
AT1G24180	264871_at	acting on the aldehyde or oxo group of donors, disulfide as acceptor / pyruvate dehydrogenase (acetyl-transferring) | chr1:8560525-8563495 REVERSE	Law et al., 2012
AT1G24240	264874_at	50S ribosomal protein L19	Law et al., 2012
AT1G25240	245636_at	epsin N-terminal homology (ENTH) domain-containing protein / clathrin assembly protein-related Identical to Putative clathrin assembly protein At1g25240 [Arabidopsis Thaliana] (GB:Q9FRH3); similar to epsin N-terminal homology (ENTH) domain-containing protein / clathrin assembly protein-related [Arabidopsis thaliana] (TAIR:AT1G68110.1); similar to unnamed protein product [Vitis vinifera] (GB:CAO42…	Law et al., 2012
AT1G25360	245630_at	pentatricopeptide (PPR) repeat-containing protein	Law et al., 2012
AT1G25380	255736_at	Encodes a mitochondrial-localized NAD+ transporter that transports NAD+ in a counter exchange mode with ADP and AMP in vitro.á	Law et al., 2012
AT1G26460	261014_at	pentatricopeptide (PPR) repeat-containing protein similar to MEE40 (maternal effect embryo arrest 40)	Law et al., 2012
AT1G26500	261003_at	pentatricopeptide (PPR) repeat-containing protein	Law et al., 2012
AT1G26740	261268_at	50S ribosomal protein L32	Law et al., 2012
AT1G26880	263691_at	60S ribosomal protein L34 (RPL34A) Identical to 60S ribosomal protein L34-1 (RPL34A) [Arabidopsis Thaliana] (GB:Q42351;GB:Q8L9D3); similar to RPL34 (RIBOSOMAL PROTEIN L34), structural constituent of ribosome [Arabidopsis thaliana] (TAIR:AT1G69620.1); similar to unknown [Populus trichocarpa] (GB:ABK92764.1); similar to unknown [Populus trichocarpa] (GB:ABK94411.1); contains InterPro domain Ribosom…	Law et al., 2012
AT1G26900	263684_at	pentatricopeptide (PPR) repeat-containing protein	Law et al., 2012
AT1G27160	264981_at	valyl-tRNA synthetase / valine--tRNA ligase-related similar to TWN2 (TWIN 2), ATP binding / aminoacyl-tRNA ligase [Arabidopsis thaliana] (TAIR:AT1G14610.1); similar to hypothetical protein OsJ_011711 [Oryza sativa (japonica cultivar-group)] (GB:EAZ28228.1); similar to Os03g0694900 [Oryza sativa (japonica cultivar-group)] (GB:NP_001050973.1); contains InterPro domain Valyl/Leucyl/Isoleucyl-tRNA sy…	Law et al., 2012
AT1G27390	264490_at	TOM20-2 (TRANSLOCASE OUTER MEMBRANE 20-2)	Law et al., 2012
AT1G28395	261439_at	Unknown function	Law et al., 2012
AT1G28690	262763_at	pentatricopeptide (PPR) repeat-containing protein	Law et al., 2012
AT1G28960	262746_at	ATNUDT15 (ARABIDOPSIS THALIANA NUDIX HYDROLASE HOMOLOG 15); hydrolase Identical to Nudix hydrolase 15, mitochondrial precursor (NUDT15) [Arabidopsis Thaliana] (GB:Q8GYB1;GB:Q67YK3;GB:Q9SHQ7); similar to ATNUDT22 (Arabidopsis thaliana Nudix hydrolase homolog 22), hydrolase [Arabidopsis thaliana] (TAIR:AT2G33980.1); similar to unnamed protein product [Vitis vinifera] (GB:CAO66349.1); contains Inter…	Law et al., 2012
AT1G29310	260896_at	protein transport protein sec61, putative similar to protein transport protein sec61, putative [Arabidopsis thaliana] (TAIR:AT1G78720.1); similar to protein transport protein sec61, putative [Arabidopsis thaliana] (TAIR:AT2G34250.1); similar to protein transport protein sec61, putative [Arabidopsis thaliana] (TAIR:AT2G34250.2); similar to putative integral membrane protein [Phaseolus vulgaris] (G…	Law et al., 2012
AT1G29500	259773_at	auxin-responsive protein, putative similar to auxin-responsive protein, putative [Arabidopsis thaliana] (TAIR:AT1G29450.1); similar to auxin-responsive protein [Brassica rapa] (GB:ABV89665.1); contains InterPro domain Auxin responsive SAUR protein (InterPro:IPR003676)	Law et al., 2012
AT1G29710	246632_at	pentatricopeptide (PPR) repeat-containing protein	Law et al., 2012
AT1G29880	256000_at	glycyl-tRNA synthetase / glycine--tRNA ligase Identical to Glycyl-tRNA synthetase 1, mitochondrial precursor (GLYRS-1) [Arabidopsis Thaliana] (GB:O23627;GB:Q8LBY0;GB:Q949T7); similar to tRNA synthetase class II (G, H, P and S) family protein [Arabidopsis thaliana] (TAIR:AT1G29870.1); similar to unnamed protein product [Vitis vinifera] (GB:CAO68394.1); similar to unnamed protein product [Vitis vin…	Law et al., 2012
AT1G29970	260026_at	50S ribosomal protein L18	Law et al., 2012
AT1G30010	260021_at	intron maturase type II family protein (splicing), maturation of nad4 RNA in Arabidopsis mitochondria	Law et al., 2012
AT1G30090	256161_at	kelch repeat-containing F-box family protein Identical to F-box/Kelch-repeat protein At1g30090 [Arabidopsis Thaliana] (GB:Q9C6Z0;GB:Q9C8R2); similar to AFR (ATTENUATED FAR-RED RESPONSE) [Arabidopsis thaliana] (TAIR:AT2G24540.1); similar to hypothetical protein [Vitis vinifera] (GB:CAN75078.1); contains InterPro domain Kelch repeat type 1 (InterPro:IPR006652); contains InterPro domain Kelch-type b…	Law et al., 2012
AT1G30120	256160_at	PDH-E1 BETA | PDH-E1 BETA (PYRUVATE DEHYDROGENASE E1 BETA); pyruvate dehydrogenase (acetyl-transferring) | chr1:10584160-10586635 REVERSE	Law et al., 2012
AT1G30620	263221_at	HSR8/MUR4/UXE1 (MURUS 4); UDP-arabinose 4-epimerase/ catalytic encodes a type-II membrane protein that catalyzes 4-epimerization of UDP-D-Xylose to UDP-L-Arabinose in vitro, the nucleotide sugar used by glycosyltransferases in the arabinosylation of cell wall polysaccharides and wall-resident proteoglycans. Identical to UDP-arabinose 4-epimerase 1 (MUR4) [Arabidopsis Thaliana] (GB:Q9SA77;GB:Q570B…	Law et al., 2012
AT1G31170	263703_at	ATSRX/SRX (SULFIREDOXIN); DNA binding / oxidoreductase, acting on sulfur group of donors encodes a cysteine-sulfinic acid reductase (sulfiredoxin - EC 1.8.98.2) capable of reducing overoxidized plastidic 2-Cys-Prx involved in peroxide detoxification and response to oxidative stress similar to ParB-like nuclease [Medicago truncatula] (GB:ABC75369.1); contains InterPro domain Sulfiredoxin (InterPro…	Law et al., 2012
AT1G31817	246266_at	30S ribosomal protein S11	Law et al., 2012
AT1G32050	255752_at	secretory carrier membrane protein (SCAMP) family protein Identical to Secretory carrier-associated membrane protein 4 (SCAMP4) [Arabidopsis Thaliana] (GB:Q9C6X2); similar to secretory carrier membrane protein (SCAMP) family protein [Arabidopsis thaliana] (TAIR:AT2G20840.1); similar to unknown [Populus trichocarpa] (GB:ABK93338.1); contains InterPro domain SCAMP; (InterPro:IPR007273)	Law et al., 2012
AT1G32350	260706_at	AOX1D (ALTERNATIVE OXIDASE 1D); alternative oxidase	Law et al., 2012
AT1G32440	260653_at	PKp3 (plastidial pyruvate kinase 3); pyruvate kinase	Law et al., 2012
AT1G32470	260704_at	glycine cleavage system H protein, mitochondrial, putative	Law et al., 2012
AT1G32480	260694_at	oxidoreductase/ oxidoreductase, acting on the CH-OH group of donors, NAD or NADP as acceptor | chr1:11741083-11741990 FORWARD	Law et al., 2012
AT1G34065	256007_at	S-adenosylmethionine carrier 2 (SAMC2); FUNCTIONS IN: binding; INVOLVED IN: transport, mitochondrial transport, transmembrane transport; LOCATED IN: mitochondrial inner membrane, membrane; EXPRESSED IN: 22 plant structures; EXPRESSED DURING: 13 growth stages; CONTAINS InterPro DOMAIN/s: Mitochondrial carrier protein (InterPro:IPR002067), Mitochondrial substrate carrier (InterPro:IPR001993), Mitoc…	Law et al., 2012
AT1G34430	261165_at	Symbols: EMB3003 | EMB3003 (embryo defective 3003); acyltransferase/ dihydrolipoyllysine-residue acetyltransferase/ protein binding | chr1:12587752-12590192 REVERSE	Law et al., 2012
AT1G43010	259622_at	pentatricopeptide (PPR) repeat-containing protein	Law et al., 2012
AT1G43860	260868_at	transcription factor similar to unnamed protein product [Vitis vinifera] (GB:CAO60901.1); contains InterPro domain Shwachman-Bodian-Diamond syndrome proteins (InterPro:IPR002140)	Law et al., 2012
AT1G43980	259483_at	pentatricopeptide (PPR) repeat-containing protein	Law et al., 2012
AT1G44318	245245_at	HEMB2; porphobilinogen synthase	Law et al., 2012
AT1G44760	261323_at	universal stress protein (USP) family protein similar to universal stress protein (USP) family protein [Arabidopsis thaliana] (TAIR:AT5G17390.1); similar to universal stress protein family protein [Brassica rapa] (GB:ABV89614.1); contains InterPro domain UspA; (InterPro:IPR006016); contains InterPro domain Rossmann-like alpha/beta/alpha sandwich fold (InterPro:IPR014729)	Law et al., 2012
AT1G45332	266127_s_at	mitochondrial elongation factor, putative Identical to Probable elongation factor G, mitochondrial precursor [Arabidopsis Thaliana] (GB:Q9C641); similar to mitochondrial elongation factor, putative [Arabidopsis thaliana] (TAIR:AT2G45030.1); similar to hypothetical protein [Vitis vinifera] (GB:CAN77652.1); similar to unnamed protein product [Vitis vinifera] (GB:CAO70599.1); similar to Mitochondria…	Law et al., 2012
AT1G47260	260508_at		Law et al., 2012
AT1G47420	262442_at	Succinate dehydrogenase subunit 5	Law et al., 2012
AT1G47640	262426_s_at	similar to unknown [Populus trichocarpa] (GB:ABK93176.1); contains domain PTHR12869 (PTHR12869)	Law et al., 2012
AT1G47720	262441_at	Encodes an organellar single-strand DNA binding protein, located in mitochondria, controls the stoichiometry of alternative mitochondrial DNA forms generated by homologous recombination.	Law et al., 2012
AT1G47765	261735_at	F-box family protein Identical to Putative F-box protein At1g47765 [Arabidopsis Thaliana] (GB:Q9FZF3); similar to F-box family protein [Arabidopsis thaliana] (TAIR:AT1G47790.1); similar to hypothetical protein [Vitis vinifera] (GB:CAN60954.1); contains InterPro domain F-box associated type 3 (InterPro:IPR013187); contains InterPro domain Cyclin-like F-box (InterPro:IPR001810); contains InterPro d…	Law et al., 2012
AT1G47830	261733_at	clathrin coat assembly protein, putative similar to AP19 (associated protein 19), ATP binding / protein binding / protein kinase [Arabidopsis thaliana] (TAIR:AT2G17380.1); similar to clathrin adaptor complex small chain family protein [Arabidopsis thaliana] (TAIR:AT4G35410.2); similar to Os12g0207300 [Oryza sativa (japonica cultivar-group)] (GB:NP_001066387.1); similar to unknown [Populus trichoc…	Law et al., 2012
AT1G48030	260730_at	ATP binding / dihydrolipoyl dehydrogenase | chr1:17717139-17719141 REVERSE	Law et al., 2012
AT1G48060	260721_at	F-box family protein Identical to F-box protein At1g48060 [Arabidopsis Thaliana] (GB:Q9LNF6;GB:Q1PFM4;GB:Q9C7Z4); similar to F-box family protein [Arabidopsis thaliana] (TAIR:AT1G47730.1); similar to Putative F-Box protein, identical [Solanum demissum] (GB:AAT38720.1); contains InterPro domain F-box associated type 3 (InterPro:IPR013187); contains InterPro domain Cyclin-like F-box (InterPro:IPR00…	Law et al., 2012
AT1G48420	262247_at	D-CDES (D-CYSTEINE DESULFHYDRASE); 1-aminocyclopropane-1-carboxylate deaminase/ D-cysteine desulfhydrase/ catalytic Encodes an enzyme that decomposes D-cysteine into pyruvate, H2S, and NH3. Only D-cysteine but not L-cysteine was converted by D-CDes to pyruvate, H2S, and NH3. Unlike homologous bacterial enzymes, it does not have 1-aminocyclopropane-1-carboxylate deaminase activity. similar to cata…	Law et al., 2012
AT1G48510	261298_at	cytochrome c oxidase assembly protein surfeit-related	Law et al., 2012
AT1G49140	260767_s_at		Law et al., 2012
AT1G49380	262397_at	cytochrome c biogenesis protein family	Law et al., 2012
AT1G49400	262415_at	30S ribosomal protein S17	Law et al., 2012
AT1G49410	262402_at	TOM6 (TRANSLOCASE OF THE OUTER MITOCHONDRIAL MEMBRANE 6)	Law et al., 2012
AT1G49630	261602_at	ATPREP2; metalloendopeptidase	Law et al., 2012
AT1G49670	261601_at	ARP protein (REF) similar to oxidoreductase, zinc-binding dehydrogenase family protein [Arabidopsis thaliana] (TAIR:AT3G56460.1); similar to hypothetical protein OsI_030620 [Oryza sativa (indica cultivar-group)] (GB:EAZ09388.1); similar to unnamed protein product [Vitis vinifera] (GB:CAO47793.1); similar to hypothetical protein OsJ_028486 [Oryza sativa (japonica cultivar-group)] (GB:EAZ45003.1); …	Law et al., 2012
AT1G49880	259817_at	Erv1/Alr family protein	Law et al., 2012
AT1G50200	262468_at	ALATS (ALANYL-TRNA SYNTHETASE); ATP binding / alanine-tRNA ligase/ ligase, forming aminoacyl-tRNA and related compounds / nucleic acid binding Identical to Alanyl-tRNA synthetase, mitochondrial precursor (ALATS) [Arabidopsis Thaliana] (GB:P36428;GB:O04159;GB:Q8GUG2;GB:Q9SX40); similar to EMB1030 (EMBRYO DEFECTIVE 1030), ATP binding / alanine-tRNA ligase/ ligase, forming aminoacyl-tRNA and related…	Law et al., 2012
AT1G50400	262459_at	porin family protein	Law et al., 2012
AT1G50450	261861_at	binding / catalytic similar to unknown [Nuphar advena] (GB:ABY60455.1); contains InterPro domain NAD(P)-binding; (InterPro:IPR016040); contains InterPro domain Saccharopine dehydrogenase (InterPro:IPR005097)	Law et al., 2012
AT1G50460	261851_at	HKL1 (HEXOKINASE-LIKE 1); ATP binding / fructokinase/ glucokinase/ hexokinase	Law et al., 2012
AT1G50500	261880_at	HIT1 (HEAT-INTOLERANT 1); transporter encodes a member of VPS53 family protein involved in the retrograde trafficking of vesicles to the late Golgi. Mutants in this gene are more sensitive to heat and osmotic stress. similar to membrane trafficking VPS53 family protein [Arabidopsis thaliana] (TAIR:AT1G50970.1); similar to unnamed protein product [Vitis vinifera] (GB:CAO23164.1); similar to hypoth…	Law et al., 2012
AT1G50840	256204_at	DNA Polymerase gamma2. Dual targeting to mitochondria and plastids due to alternative translation initiation	Law et al., 2012
AT1G50940	256209_at	ETFALPHA | (electron transfer flavoprotein alpha); FAD binding / electron carrier | chr1:18877812-18880010 REVERSE	Law et al., 2012
AT1G51650	256184_at	ATP synthase epsilon subunit	Law et al., 2012
AT1G51980	265056_at	Mitochondrial processing peptidase alpha subunit	Law et al., 2012
AT1G52370	253773_s_at	50S ribosomal protein L22	Law et al., 2012
AT1G52560	262148_at	26.5 kDa class I small heat shock protein-like (HSP26.5-P) similar to HSP21 (HEAT SHOCK PROTEIN 21) [Arabidopsis thaliana] (TAIR:AT4G27670.1); similar to unnamed protein product [Vitis vinifera] (GB:CAO62740.1); contains InterPro domain HSP20-like chaperone (InterPro:IPR008978); contains InterPro domain Heat shock protein Hsp20 (InterPro:IPR002068)	Law et al., 2012
AT1G52620	262144_at	pentatricopeptide (PPR) repeat-containing protein	Law et al., 2012
AT1G52640	262142_at	pentatricopeptide (PPR) repeat-containing protein	Law et al., 2012
AT1G53000	261373_at	cytidylyltransferase family	Law et al., 2012
AT1G53030	261317_at	cytochrome c oxidase copper chaperone family protein / Involved in COX biogenesis	Law et al., 2012
AT1G53240	260615_at	malate dehydrogenase (NAD), mitochondrial | chr1:19854615-19856937 REVERSE	Law et al., 2012
AT1G53290	260644_at	galactosyltransferase family protein similar to galactosyltransferase family protein [Arabidopsis thaliana] (TAIR:AT3G14960.1); similar to UCW98, putative galactosyltransferease [Hordeum vulgare subsp. vulgare] (GB:ABL11234.1); contains InterPro domain Glycosyl transferase, family 31; (InterPro:IPR002659)	Law et al., 2012
AT1G53310	260590_at	ATPPC1 (PHOSPHOENOLPYRUVATE CARBOXYLASE 1); catalytic/ phosphoenolpyruvate carboxylase	Law et al., 2012
AT1G53360	260612_at	F-box family protein-related similar to F-box family protein [Arabidopsis thaliana] (TAIR:AT1G53370.1); similar to hypothetical protein [Vitis vinifera] (GB:CAN60955.1); contains InterPro domain F-box associated type 3 (InterPro:IPR013187); contains InterPro domain F-box associated type 1 (InterPro:IPR006527)	Law et al., 2012
AT1G53460	260981_at	structural molecule similar to unnamed protein product [Vitis vinifera] (GB:CAO39428.1); similar to hypothetical protein [Vitis vinifera] (GB:CAN60929.1); contains InterPro domain Vinculin/alpha-catenin; (InterPro:IPR006077)	Law et al., 2012
AT1G53530	260972_at	signal peptidase I family protein	Law et al., 2012
AT1G53600	260980_at	pentatricopeptide (PPR) repeat-containing protein	Law et al., 2012
AT1G53760	262251_at	similar to unnamed protein product [Vitis vinifera] (GB:CAO45535.1)	Law et al., 2012
AT1G54120	263151_at	similar to unknown protein [Arabidopsis thaliana] (TAIR:AT3G14060.1); similar to unnamed protein product [Vitis vinifera] (GB:CAO45609.1)	Law et al., 2012
AT1G54220	262963_at	dihydrolipoamide S-acetyltransferase, putative | chr1:20246130-20250310 REVERSE	Law et al., 2012
AT1G54340	262962_at	Symbols: ICDH | ICDH (ISOCITRATE DEHYDROGENASE); isocitrate dehydrogenase (NADP+)/ oxidoreductase, acting on the CH-OH group of donors, NAD or NADP as acceptor | chr1:20283480-20286786 FORWARD	Law et al., 2012
AT1G54700	264237_at	FUNCTIONS IN: molecular_function unknown; INVOLVED IN: biological_process unknown; LOCATED IN: mitochondrion; CONTAINS InterPro DOMAIN/s: Serine endopeptidase DegP2 (InterPro:IPR015724); BEST Arabidopsis thaliana protein match is: DegP protease 13 (TAIR:AT5G40560.1); Has 78 Blast hits to 78 proteins in 13 species: Archae - 0; Bacteria - 0; Metazoa - 0; Fungi - 0; Plants - 78; Viruses - 0; Other E…	Law et al., 2012
AT1G54990	256322_at	AXR4 (AUXIN RESISTANT 4) auxin response mutant (AXR4) Identical to Protein AUXIN RESPONSE 4 (AXR4) [Arabidopsis Thaliana] (GB:Q9FZ33;GB:Q944Q7); similar to unnamed protein product [Vitis vinifera] (GB:CAO17597.1); contains domain PTHR10992:SF20 (PTHR10992:SF20); contains domain PTHR10992 (PTHR10992); contains domain SSF53474 (SSF53474); contains domain G3DSA:3.40.50.1820 (G3DSA:3.40.50.1820)	Law et al., 2012
AT1G55160	259665_at	similar to unknown protein [Arabidopsis thaliana] (TAIR:AT2G19530.1); similar to unnamed protein product [Vitis vinifera] (GB:CAO45689.1)	Law et al., 2012
AT1G55510	265070_at	BCDH BETA1 (BRANCHED-CHAIN ALPHA-KETO ACID DECARBOXYLASE E1 BETA SUBUNIT); 3-methyl-2-oxobutanoate dehydrogenase (2-methylpropanoyl-transferring) branched-chain alpha-keto acid decarboxylase E1 beta similar to DIN4 (DARK INDUCIBLE 4), 3-methyl-2-oxobutanoate dehydrogenase (2-methylpropanoyl-transferring) [Arabidopsis thaliana] (TAIR:AT3G13450.1); similar to unnamed protein product [Vitis vinifera…	Law et al., 2012
AT1G55630	264540_at	pentatricopeptide (PPR) repeat-containing protein	Law et al., 2012
AT1G55860	264335_s_at	UPL1 (UBIQUITIN-PROTEIN LIGASE 1); ubiquitin-protein ligase encodes a ubiquitin-protein ligase containing a HECT domain. There are six other HECT-domain UPLs in Arabidopsis. Identical to E3 ubiquitin-protein ligase UPL1 (UPL1) [Arabidopsis Thaliana] (GB:Q8GY23;GB:Q9LG27;GB:Q9M7K7); similar to UPL2 (UBIQUITIN-PROTEIN LIGASE 2), ubiquitin-protein ligase [Arabidopsis thaliana] (TAIR:AT1G70320.1); si…	Law et al., 2012
AT1G55890	260595_at	pentatricopeptide (PPR) repeat-containing protein	Law et al., 2012
AT1G55900	260596_at	TIM50 (EMBRYO DEFECTIVE 1860)	Law et al., 2012
AT1G56150	262092_at	auxin-responsive family protein	Law et al., 2012
AT1G56190	256228_at	phosphoglycerate kinase, putative Identical to Phosphoglycerate kinase, chloroplast precursor [Arabidopsis Thaliana] (GB:P50318;GB:Q9SGU6); similar to PGK1 (PHOSPHOGLYCERATE KINASE 1), phosphoglycerate kinase [Arabidopsis thaliana] (TAIR:AT3G12780.1); similar to Phosphoglycerate kinase, chloroplast precursor (GB:Q42961); similar to hypothetical protein [Vitis vinifera] (GB:CAN81990.1); similar to…	Law et al., 2012
AT1G56340	256216_at	CRT1 (CALRETICULIN 1); calcium ion binding Encodes calreticulin CRT1. Identical to Calreticulin-1 precursor (CRT1) [Arabidopsis Thaliana] (GB:O04151); similar to calreticulin 2 (CRT2) [Arabidopsis thaliana] (TAIR:AT1G09210.1); similar to Calreticulin precursor (GB:P93508); contains InterPro domain Calreticulin/calnexin, P; (InterPro:IPR009033); contains InterPro domain Concanavalin A-like lectin/…	Law et al., 2012
AT1G56690	245673_at	pentatricopeptide (PPR) repeat-containing protein	Law et al., 2012
AT1G58180	246396_at	carbonic anhydrase family protein / carbonate dehydratase family protein similar to carbonic anhydrase family protein / carbonate dehydratase family protein [Arabidopsis thaliana] (TAIR:AT4G33580.1); similar to unnamed protein product [Vitis vinifera] (GB:CAO61613.1); contains InterPro domain Carbonic anhydrase, prokaryotic-like, conserved site; (InterPro:IPR015892); contains InterPro domain Carb…	Law et al., 2012
AT1G58230	256201_at	WD-40 repeat family protein / beige-related similar to WD-40 repeat family protein / beige-related [Arabidopsis thaliana] (TAIR:AT2G45540.1); similar to hypothetical protein OsI_023317 [Oryza sativa (indica cultivar-group)] (GB:EAZ02085.1); similar to putative LvsC [Oryza sativa (japonica cultivar-group)] (GB:BAD25221.1); similar to hypothetical protein OsI_005826 [Oryza sativa (indica cultivar-g…	Law et al., 2012
AT1G58290	256020_at	HEMA1; glutamyl-tRNA reductase	Law et al., 2012
AT1G59720	262907_at	pentatricopeptide (PPR) repeat-containing protein	Law et al., 2012
AT1G59870	262899_at	PDR8/PEN3 (PLEIOTROPIC DRUG RESISTANCE8); ATPase, coupled to transmembrane movement of substances / cadmium ion transmembrane transporter ATP binding cassette transporter. Localized to the plasma membrane in uninfected cells. In infected leaves, the protein concentrated at infection sites. Contributes to nonhost resistance to inappropriate pathogens that enter by direct penetration in a salicylic…	Law et al., 2012
AT1G59900	262908_at	AT-E1 ALPHA; oxidoreductase, acting on the aldehyde or oxo group of donors, disulfide as acceptor / pyruvate dehydrogenase (acetyl-transferring) | chr1:22051295-22053885 FORWARD	Law et al., 2012
AT1G60770	264913_at	pentatricopeptide (PPR) repeat-containing protein	Law et al., 2012
AT1G60810	264916_at	Symbols: ACLA-2 | ACLA-2; ATP citrate synthase | chr1:22388527-22391165 REVERSE	Law et al., 2012
AT1G61570	265006_at	TIM13; P-P-bond-hydrolysis-driven protein transmembrane transporter	Law et al., 2012
AT1G61870	264286_at	PPR336 (PENTATRICOPEPTIDE REPEAT 336)	Law et al., 2012
AT1G61990	264308_at	mitochondrial transcription termination factor-related / mTERF-related	Law et al., 2012
AT1G62670	262687_at	pentatricopeptide (PPR) repeat-containing protein	Law et al., 2012
AT1G62730	262641_at	similar to hypothetical protein [Vitis vinifera] (GB:CAN63693.1); contains InterPro domain Terpenoid synthase (InterPro:IPR008949)	Law et al., 2012
AT1G62750	262645_at	ATSCO1/ATSCO1/CPEF-G/SCO1 (SNOWY COTYLEDON1); translation elongation factor/ translation factor, nucleic acid binding Nuclear encoded protein consists of the five domains conserved in EF-G proteins, with two GTP-binding sites in the first domain, and an additional transit peptide at the N-terminus. Localized in chloroplasts. Point mutation results in a delay in the onset of germination. At early …	Law et al., 2012
AT1G62910	261104_at	pentatricopeptide (PPR) repeat-containing protein	Law et al., 2012
AT1G63070	259684_at	pentatricopeptide (PPR) repeat-containing protein	Law et al., 2012
AT1G63080	259692_at	pentatricopeptide (PPR) repeat-containing protein Transacting siRNA generating locus. Is targeted by TAS2-derived ta-siR2140 for cleavage.	Law et al., 2012
AT1G63130	259689_x_at	pentatricopeptide (PPR) repeat-containing protein Transacting siRNA generating locus. Its derived siR9as targets AT1G62930 for cleavage. Itself is targeted by TAS2-derived ta-siR2140 for cleavage.	Law et al., 2012
AT1G63150	259696_at	pentatricopeptide (PPR) repeat-containing protein Transacting siRNA generating locus.	Law et al., 2012
AT1G63940	260325_at	monodehydroascorbate reductase, putative	Law et al., 2012
AT1G64185	262338_at	lactoylglutathione lyase family protein / glyoxalase I family protein similar to lactoylglutathione lyase family protein / glyoxalase I family protein [Arabidopsis thaliana] (TAIR:AT5G41650.1); similar to unnamed protein product [Vitis vinifera] (GB:CAO65867.1); similar to unknown [Populus trichocarpa] (GB:ABK93252.1); contains InterPro domain Glyoxalase/bleomycin resistance protein/dioxygenase (…	Law et al., 2012
AT1G64220	262336_at	TOM7-2 (TRANSLOCASE OF OUTER MEMBRANE 7 KDA SUBUNIT 2); P-P-bond-hydrolysis-driven protein transmembrane transporter	Law et al., 2012
AT1G64880	262880_at	30S ribosomal protein S5	Law et al., 2012
AT1G64960	262867_at	binding similar to unnamed protein product [Vitis vinifera] (GB:CAO72002.1); similar to hypothetical protein [Vitis vinifera] (GB:CAN75759.1); similar to unnamed protein product [Vitis vinifera] (GB:CAO17286.1); contains InterPro domain Armadillo-type fold; (InterPro:IPR016024); contains InterPro domain HEAT (InterPro:IPR000357)	Law et al., 2012
AT1G65170	257454_at	ubiquitin carboxyl-terminal hydrolase family protein similar to ubiquitin carboxyl-terminal hydrolase family protein [Arabidopsis thaliana] (TAIR:AT1G65160.1); similar to unnamed protein product [Vitis vinifera] (GB:CAO62486.1); similar to Os03g0165600 [Oryza sativa (japonica cultivar-group)] (GB:NP_001049069.1); contains InterPro domain Peptidase C19, ubiquitin carboxyl-terminal hydrolase 2; (In…	Law et al., 2012
AT1G65290	264162_at	Encodes a member of the mitochondrial acyl carrier protein (ACP) family. As part of the mitochondrial matrix, it is likely to be involved in fatty acid or lipoic acid biogenesis.	Law et al., 2012
AT1G65420	264161_at	Identical to Ycf20-like protein [Arabidopsis Thaliana] (GB:O80813); similar to unknown protein [Arabidopsis thaliana] (TAIR:AT3G56830.2); similar to unknown protein [Arabidopsis thaliana] (TAIR:AT3G56830.3); similar to unknown protein [Arabidopsis thaliana] (TAIR:AT3G56830.1); similar to unnamed protein product [Vitis vinifera] (GB:CAO44991.1); contains InterPro domain Protein of unknown function…	Law et al., 2012
AT1G65540	264629_at	calcium-binding EF hand family protein	Law et al., 2012
AT1G65630	264631_at	DEGP3 (DEGP PROTEASE 3); serine-type peptidase/ trypsin Encodes a putative DegP protease. Identical to Putative protease Do-like 3, mitochondrial precursor (DEGP3) [Arabidopsis Thaliana] (GB:Q9SHZ1;GB:O04480); similar to DEGP10 (DEGP PROTEASE 10), serine-type peptidase/ trypsin [Arabidopsis thaliana] (TAIR:AT5G36950.1); similar to unnamed protein product [Vitis vinifera] (GB:CAO15604.1); contains…	Law et al., 2012
AT1G65640	264632_at	Encodes a putative DegP protease.	Law et al., 2012
AT1G65930	261920_at	isocitrate dehydrogenase, putative / NADP+ isocitrate dehydrogenase, putative | chr1:24538886-24542129 FORWARD	Law et al., 2012
AT1G66430	260107_at	pfkB-type carbohydrate kinase family protein	Law et al., 2012
AT1G66590	260418_s_at	Involved in COX biogenesis	Law et al., 2012
AT1G67350	265001_at		Law et al., 2012
AT1G67620	260200_at	Lojap-related	Law et al., 2012
AT1G67630	260192_at	POLA2; alpha DNA polymerase similar to unnamed protein product [Vitis vinifera] (GB:CAO46654.1); contains InterPro domain DNA polymerase alpha/epsilon, subunit B; (InterPro:IPR007185); contains InterPro domain DNA polymerase alpha, subunit B (InterPro:IPR016722)	Law et al., 2012
AT1G68110	260011_at	epsin N-terminal homology (ENTH) domain-containing protein / clathrin assembly protein-related Identical to Putative clathrin assembly protein At1g68110 [Arabidopsis Thaliana] (GB:Q9C9X5); similar to epsin N-terminal homology (ENTH) domain-containing protein / clathrin assembly protein-related [Arabidopsis thaliana] (TAIR:AT1G25240.1); similar to hypothetical protein [Vitis vinifera] (GB:CAN69255…	Law et al., 2012
AT1G68140	260436_at	similar to protein binding / zinc ion binding [Arabidopsis thaliana] (TAIR:AT4G08460.1); similar to protein binding / zinc ion binding [Arabidopsis thaliana] (TAIR:AT4G08460.2); similar to Pm27 [Prunus mume] (GB:BAE48661.1); contains InterPro domain Protein of unknown function DUF1644 (InterPro:IPR012866)	Law et al., 2012
AT1G68430	259857_at	unknown protein	Law et al., 2012
AT1G68680	262285_at		Law et al., 2012
AT1G68750	260032_at	ATPPC4; phosphoenolpyruvate carboxylase	Law et al., 2012
AT1G68820	260042_at	membrane protein, putative similar to zinc finger (C3HC4-type RING finger) family protein [Arabidopsis thaliana] (TAIR:AT1G73950.1); similar to unnamed protein product [Vitis vinifera] (GB:CAO42086.1); similar to unnamed protein product [Vitis vinifera] (GB:CAO68014.1); contains InterPro domain Zinc finger, RING-type; (InterPro:IPR001841)	Law et al., 2012
AT1G68930	259698_at	pentatricopeptide (PPR) repeat-containing protein	Law et al., 2012
AT1G68980	259700_at	pentatricopeptide (PPR) repeat-containing protein	Law et al., 2012
AT1G68990	259672_at	MGP3 (male gametophyte-defective 3) belongs to a small family of nuclear-encoded Phage type RNA polymerases (RPOTs) involved in the transcription of mitochondrial genes in Arabidopsis thaliana. Mutation in MGP 3 significantly retarded pollen tube growth and caused defective embryo development.	Law et al., 2012
AT1G69190	260340_at	2-amino-4-hydroxy-6-hydroxymethyldihydropteridine diphosphokinase/ dihydropteroate synthase/encodes a bifunctional cytosolic hydroxymethyldihydropterin pyrophosphokinase/ dihydropteroate synthase (HPPK/DHPS)that is involved in tetrahydrofolate biosynthesis and is responsive to oxidative stress.	Law et al., 2012
AT1G69200	260343_at	kinase	Law et al., 2012
AT1G69220	260339_at	SIK1 (ERINE/THREONINE KINASE 1); kinase Encodes a putative serine/threonine kinase (SIK1). similar to unknown protein [Arabidopsis thaliana] (TAIR:AT1G53165.2); similar to kinase [Arabidopsis thaliana] (TAIR:AT1G53165.1); similar to putative serine/ threonine kinase [Sorghum bicolor] (GB:AAM47579.1); similar to 36I5.3 [Oryza sativa (japonica cultivar-group)] (GB:AAG45491.1); similar to unnamed pr…	Law et al., 2012
AT1G69350	260348_at	pentatricopeptide (PPR) repeat-containing protein	Law et al., 2012
AT1G69740	260370_at	HEMB1; porphobilinogen synthase	Law et al., 2012
AT1G69750	260418_s_at		Law et al., 2012
AT1G70080	264720_at	terpene synthase/cyclase family protein similar to terpene synthase/cyclase family protein [Arabidopsis thaliana] (TAIR:AT3G14520.1); similar to hypothetical protein [Vitis vinifera] (GB:CAN68620.1); contains InterPro domain Terpenoid cylases/protein prenyltransferase alpha-alpha toroid (InterPro:IPR008930); contains InterPro domain Terpene synthase, metal-binding; (InterPro:IPR005630); contains …	Law et al., 2012
AT1G70190	264702_at	ribosomal protein L12 family protein similar to ribosomal protein L12 family protein [Arabidopsis thaliana] (TAIR:AT4G37660.1); similar to unnamed protein product [Vitis vinifera] (GB:CAO64031.1); contains InterPro domain Ribosomal protein L7/L12, C-terminal/adaptor protein ClpS-like (InterPro:IPR014719); contains InterPro domain Ribosomal protein L7/L12, oligomerisation; (InterPro:IPR008932); co…	Law et al., 2012
AT1G70730	260207_at	phosphoglucomutase, cytoplasmic, putative / glucose phosphomutase, putative	Law et al., 2012
AT1G70820	262309_at	phosphoglucomutase, putative / glucose phosphomutase, putative	Law et al., 2012
AT1G70895	262261_at	CLE17 (CLAVATA3/ESR-RELATED 17); receptor binding Member of a large family of putative ligands homologous to the Clavata3 gene. Consists of a single exon.	Law et al., 2012
AT1G71060	259746_at	pentatricopeptide (PPR) repeat-containing protein	Law et al., 2012
AT1G71210	259899_at	pentatricopeptide (PPR) repeat-containing protein	Law et al., 2012
AT1G71260	259942_at	Encodes WHY2, a homolog of the potato p24 protein. It shares the conserved KGKAAL domain, a putative DNA-binding domain, with potato p24 and is localized to mitochondria and not the nucleus. WHY2 is a member of the Whirly family proteins present mainly in the plant kingdom performing various activities related to DNA metabolism. Crystal structure of Solanum tuberosum WHY2, a close homolog of Arab…	Law et al., 2012
AT1G71420	259949_at	pentatricopeptide (PPR) repeat-containing protein	Law et al., 2012
AT1G71720	261507_at	30S ribosomal protein S1	Law et al., 2012
AT1G71740	261509_at	similar to unknown protein [Arabidopsis thaliana] (TAIR:AT3G18560.1); similar to hypothetical protein [Vitis vinifera] (GB:CAN60388.1)	Law et al., 2012
AT1G71850	257487_at	Ubiq. C-term. hydrolase	Law et al., 2012
AT1G72020	256342_at	similar to unknown [Populus trichocarpa] (GB:ABK92617.1)	Law et al., 2012
AT1G72170	259847_at	similar to unknown protein [Arabidopsis thaliana] (TAIR:AT1G22520.1); similar to unknown [Populus trichocarpa] (GB:ABK94376.1); similar to Os03g0840900 [Oryza sativa (japonica cultivar-group)] (GB:NP_001051850.1); contains InterPro domain Protein of unknown function DUF543 (InterPro:IPR007512)	Law et al., 2012
AT1G72270	259827_at	similar to binding [Arabidopsis thaliana] (TAIR:AT4G27010.1); similar to unnamed protein product [Vitis vinifera] (GB:CAO38969.1); similar to hypothetical protein [Vitis vinifera] (GB:CAN83957.1); similar to OSJNBa0053K19.25 [Oryza sativa (japonica cultivar-group)] (GB:CAE03517.2); contains domain PTHR22930 (PTHR22930)	Law et al., 2012
AT1G72750	259890_at	ATTIM23-2 (Arabidopsis thaliana translocase inner membrane subunit 23-2); P-P-bond-hydrolysis-driven protein transmembrane transporter	Law et al., 2012
AT1G72820	262355_at	Mitochondrial substrate carrier family protein; FUNCTIONS IN: binding; INVOLVED IN: transport, mitochondrial transport, transmembrane transport; LOCATED IN: mitochondrial inner membrane, membrane; EXPRESSED IN: 23 plant structures; EXPRESSED DURING: 13 growth stages; CONTAINS InterPro DOMAIN/s: Mitochondrial carrier protein (InterPro:IPR002067), Mitochondrial substrate carrier (InterPro:IPR001993…	Law et al., 2012
AT1G73260	260101_at	trypsin and protease inhibitor family protein / Kunitz family protein similar to trypsin and protease inhibitor family protein / Kunitz family protein [Arabidopsis thaliana] (TAIR:AT1G17860.1); similar to trypsin inhibitor propeptide [Brassica oleracea] (GB:AAB68964.1); contains InterPro domain Kunitz inhibitor ST1-like (InterPro:IPR011065); contains InterPro domain Proteinase inhibitor I3, Kunit…	Law et al., 2012
AT1G73940	260390_at	similar to unknown protein [Arabidopsis thaliana] (TAIR:AT5G49410.1); similar to unknown protein [Arabidopsis thaliana] (TAIR:AT5G49410.2); similar to unnamed protein product [Vitis vinifera] (GB:CAO62865.1)	Law et al., 2012
AT1G74030	260392_at	enolase, putative	Law et al., 2012
AT1G74130	259905_s_at	[AT1G74140, similar to rhomboid family protein [Arabidopsis thaliana] (TAIR:AT1G74130.1); similar to unnamed protein product [Vitis vinifera] (GB:CAO62451.1); contains InterPro domain Peptidase S54, rhomboid; (InterPro:IPR002610)];[AT1G74130, rhomboid family protein]	Law et al., 2012
AT1G74230	260245_at	GR-RBP5 (glycine-rich RNA-binding protein 5); RNA binding encodes a glycine-rich RNA binding protein. similar to GR-RBP3 (glycine-rich RNA-binding protein 3), RNA binding [Arabidopsis thaliana] (TAIR:AT5G61030.1); similar to unknown [Brassica rapa] (GB:ABB97027.1); contains InterPro domain Eggshell protein (InterPro:IPR002952); contains InterPro domain RNA recognition motif, glycine rich protein …	Law et al., 2012
AT1G74240	260252_at	Mitochondrial substrate carrier family protein; FUNCTIONS IN: binding; INVOLVED IN: transport, mitochondrial transport, transmembrane transport; LOCATED IN: mitochondrial inner membrane, membrane; EXPRESSED IN: 11 plant structures; EXPRESSED DURING: 6 growth stages; CONTAINS InterPro DOMAIN/s: Mitochondrial carrier protein (InterPro:IPR002067), Mitochondrial substrate carrier (InterPro:IPR001993)…	Law et al., 2012
AT1G74260	260250_at	catalytic Identical to Probable phosphoribosylformylglycinamidine synthase, chloroplast precursor [Arabidopsis Thaliana] (GB:Q9M8D3); similar to phosphoribosylformylglycinamidine synthase [Glycine max] (GB:AAO23951.1); similar to formylglycinamide ribonucleotide amidotransferase [Vigna unguiculata] (GB:AAL55431.1); similar to putative formylglycineamide ribotide amidotransferase [Oryza sativa (ja…	Law et al., 2012
AT1G74350	260256_at	Intron maturase, type II family protein; FUNCTIONS IN: RNA binding, RNA-directed DNA polymerase activity; INVOLVED IN: RNA-dependent DNA replication, RNA splicing	Law et al., 2012
AT1G74360	260239_at	leucine-rich repeat transmembrane protein kinase, putative	Law et al., 2012
AT1G74680	262223_at	exostosin family protein similar to exostosin family protein [Arabidopsis thaliana] (TAIR:AT3G45400.1); similar to unnamed protein product [Vitis vinifera] (GB:CAO64549.1); contains InterPro domain Exostosin-like; (InterPro:IPR004263)	Law et al., 2012
AT1G74750	262219_at	pentatricopeptide (PPR) repeat-containing protein	Law et al., 2012
AT1G74900	262224_at	OTP43 (ORGANELLE TRANSCRIPT PROCESSING DEFECT 43) similar to pentatricopeptide (PPR) repeat-containing protein	Law et al., 2012
AT1G75510	262950_at	transcription initiation factor IIF beta subunit (TFIIF-beta) family protein similar to ATP binding / RNA polymerase II transcription factor/ catalytic [Arabidopsis thaliana] (TAIR:AT3G52270.1); similar to unnamed protein product [Vitis vinifera] (GB:CAO61065.1); contains InterPro domain Winged helix repressor DNA-binding (InterPro:IPR011991); contains InterPro domain Transcription Factor IIF, Ra…	Law et al., 2012
AT1G76200	261723_at		Law et al., 2012
AT1G76280	261775_at	pentatricopeptide (PPR) repeat-containing protein	Law et al., 2012
AT1G76550	259969_at	pyrophosphate--fructose-6-phosphate 1-phosphotransferase alpha subunit, putative / pyrophosphate-dependent 6-phosphofructose-1-kinase, putative	Law et al., 2012
AT1G77010	264946_at	pentatricopeptide (PPR) repeat-containing protein	Law et al., 2012
AT1G77360	246383_at	pentatricopeptide (PPR) repeat-containing protein	Law et al., 2012
AT1G77750	259678_at	30S ribosomal protein S13, chloroplast, putative Identical to Small ribosomal subunit protein S13, mitochondrial precursor (RPS13) [Arabidopsis Thaliana] (GB:Q9CA19); similar to 30S ribosomal protein S13, chloroplast (CS13) [Arabidopsis thaliana] (TAIR:AT5G14320.1); similar to unknown [Populus trichocarpa] (GB:ABK96168.1); contains InterPro domain Ribosomal protein S13-like, H2TH; (InterPro:IPR01…	Law et al., 2012
AT1G78050	262180_at	PGM (PHOSPHOGLYCERATE/BISPHOSPHOGLYCERATE MUTASE); catalytic/ intramolecular transferase, phosphotransferases	Law et al., 2012
AT1G78180	260082_at	Mitochondrial substrate carrier family protein; FUNCTIONS IN: binding; INVOLVED IN: transport, mitochondrial transport, transmembrane transport; LOCATED IN: mitochondrial inner membrane, membrane; EXPRESSED IN: 22 plant structures; EXPRESSED DURING: 13 growth stages; CONTAINS InterPro DOMAIN/s: Mitochondrial carrier protein (InterPro:IPR002067), Mitochondrial substrate carrier (InterPro:IPR001993…	Law et al., 2012
AT1G78620	263129_at	integral membrane family protein similar to unknown [Picea sitchensis] (GB:ABK22124.1); similar to Os01g0729100 [Oryza sativa (japonica cultivar-group)] (GB:NP_001044132.1); contains InterPro domain Protein of unknown function DUF92, transmembrane (InterPro:IPR002794)	Law et al., 2012
AT1G79010	264097_s_at		Law et al., 2012
AT1G79230	264095_at	ST1 (MERCAPTOPYRUVATE SULFURTRANSFERASE 1); thiosulfate sulfurtransferase encodes a sulfurtransferase/rhodaneses, which belongs to a group of enzymes widely distributed in all three phyla that catalyze the transfer of sulfur from a donor to a thiophilic acceptor substrate. The protein and transcript levels are NOT affected by senescence or exogenous cyanide, suggesting that sulfurtransferases are…	Law et al., 2012
AT1G79430	262921_at	APL like transcription factor, Encodes gene product that is required for several aspects of phloem development in the root: (1) the specific divisions organizing the phloem pole, (2) sieve element differentiation and (3) the expression of a companion-specific gene. Mutant has a defect in the organization of phloem poles in the root. apl seedlings have a short, determinate root with only occasiona…	Law et al., 2012
AT1G79440	262892_at	ALDH5F1 (SUCCINIC SEMIALDEHYDE DEHYDROGENASE); 3-chloroallyl aldehyde dehydrogenase/ succinate-semialdehyde dehydrogenase Encodes a mitochondrial succinic semialdehyde dehydrogenase (SSADH). Nomenclature according to Kirch, et al (2004). Identical to Succinate-semialdehyde dehydrogenase, mitochondrial precursor (ALDH5F1) [Arabidopsis Thaliana] (GB:Q9SAK4;GB:Q9SEK4); similar to ALDH10A9 (Aldehyde …	Law et al., 2012
AT1G79490	262941_at	pentatricopeptide (PPR) repeat-containing protein	Law et al., 2012
AT1G79540	262938_at	pentatricopeptide (PPR) repeat-containing protein	Law et al., 2012
AT1G79550	262944_at	PGK (PHOSPHOGLYCERATE KINASE); phosphoglycerate kinase	Law et al., 2012
AT1G79750	261355_at	Symbols: ATNADP-ME4 | ATNADP-ME4 (NADP-malic enzyme 4); malate dehydrogenase (oxaloacetate-decarboxylating) (NADP+)/ malic enzyme/ oxidoreductase, acting on NADH or NADPH, NAD or NADP as acceptor | chr1:30007326-30011393 REVERSE	Law et al., 2012
AT1G79900	260163_at	ATMBAC2/BAC2 (Arabidopsis mitochondrial basic amino acid carrier 2); L-ornithine transmembrane transporter/ binding / carnitine:acyl carnitine antiporter	Law et al., 2012
AT1G79940	262053_at	heat shock protein binding / unfolded protein binding similar to DNAJ heat shock N-terminal domain-containing protein / sec63 domain-containing protein [Arabidopsis thaliana] (TAIR:AT4G21180.1); similar to unnamed protein product [Vitis vinifera] (GB:CAO49512.1); similar to unknown [Populus trichocarpa] (GB:ABK92488.1); similar to hypothetical protein OsI_014762 [Oryza sativa (indica cultivar-gro…	Law et al., 2012
AT1G79950	262066_at	helicase-related similar to helicase-related [Arabidopsis thaliana] (TAIR:AT1G20750.1); similar to DEAH helicase isoform 5-like [Oryza sativa (japonica cultivar-group)] (GB:BAD52706.1); similar to Os01g0592900 [Oryza sativa (japonica cultivar-group)] (GB:NP_001043456.1); similar to predicted protein [Physcomitrella patens subsp. patens] (GB:EDQ83085.1); contains InterPro domain DNA helicase (DNA …	Law et al., 2012
AT1G80230	262048_at	Cytochrome c oxidase subunit 5b	Law et al., 2012
AT1G80270	260331_at	DNA-binding protein, putative similar to DNA binding	Law et al., 2012
AT1G80550	260273_at	pentatricopeptide (PPR) repeat-containing protein	Law et al., 2012
AT1G80620	259861_at	30S ribosomal protein S15	Law et al., 2012
AT1G80880	257475_at	pentatricopeptide (PPR) repeat-containing protein	Law et al., 2012
AT2G01090	262206_at	Mitochondrial processing peptidase beta subunit	Law et al., 2012
AT2G01140	265735_at	fructose-bisphosphate aldolase, putative Identical to Probable fructose-bisphosphate aldolase 3, chloroplast precursor (FBA3) [Arabidopsis Thaliana] (GB:Q9ZU52); similar to fructose-bisphosphate aldolase, putative [Arabidopsis thaliana] (TAIR:AT4G38970.1); similar to unnamed protein product [Vitis vinifera] (GB:CAO42215.1); similar to unknown [Populus trichocarpa] (GB:ABK94899.1); similar to unkn…	Law et al., 2012
AT2G01390	265792_at	pentatricopeptide (PPR) repeat-containing protein	Law et al., 2012
AT2G01460	266349_at	phosphoribulokinase/uridine kinase family protein	Law et al., 2012
AT2G01510	266341_at	pentatricopeptide (PPR) repeat-containing protein	Law et al., 2012
AT2G01740	265865_at	pentatricopeptide (PPR) repeat-containing protein	Law et al., 2012
AT2G01900	263596_at	endonuclease/exonuclease/phosphatase family protein similar to endonuclease/exonuclease/phosphatase family protein [Arabidopsis thaliana] (TAIR:AT2G37440.1); similar to unnamed protein product [Vitis vinifera] (GB:CAO42415.1); contains InterPro domain Inositol polyphosphate related phosphatase; (InterPro:IPR000300); contains InterPro domain Endonuclease/exonuclease/phosphatase (InterPro:IPR005135)	Law et al., 2012
AT2G02050	265219_at		Law et al., 2012
AT2G02510	267239_at		Law et al., 2012
AT2G02750	267473_at	pentatricopeptide (PPR) repeat-containing protein	Law et al., 2012
AT2G03130	266729_at	50S ribosomal protein L12	Law et al., 2012
AT2G03380	265708_at	pentatricopeptide (PPR) repeat-containing protein	Law et al., 2012
AT2G03690	264038_at	coenzyme Q biosynthesis Coq4 family protein / ubiquinone biosynthesis Coq4 family protein	Law et al., 2012
AT2G03880	263362_at	pentatricopeptide (PPR) repeat-containing protein	Law et al., 2012
AT2G04030	263483_at	CR88 (EMBRYO DEFECTIVE 1956); ATP binding Encodes a chloroplast-targeted 90-kDa heat shock protein located in the stroma involved in red-light mediated deetiolation response. Mutants are resistant to chlorate, have elongated hypocotyls in light, and affect the expression of NR2, CAB, and RBCS but NOT NR1 and NiR. similar to ATP binding [Arabidopsis thaliana] (TAIR:AT3G07770.1); similar to hypothe…	Law et al., 2012
AT2G04540	263863_at	3-oxoacyl-(acyl-carrier-protein) synthase II, putative Identical to 3-oxoacyl-[acyl-carrier-protein] synthase, mitochondrial precursor (KAS) [Arabidopsis Thaliana] (GB:Q8L3X9;GB:Q9SJB7); similar to FAB1 (FATTY ACID BIOSYNTHESIS 1), fatty-acid synthase [Arabidopsis thaliana] (TAIR:AT1G74960.1); similar to FAB1 (FATTY ACID BIOSYNTHESIS 1), fatty-acid synthase [Arabidopsis thaliana] (TAIR:AT1G74960.…	Law et al., 2012
AT2G04940	263344_at	scramblase-related similar to unnamed protein product [Vitis vinifera] (GB:CAO62219.1); similar to hypothetical protein [Vitis vinifera] (GB:CAN68431.1); contains InterPro domain Scramblase (InterPro:IPR005552)	Law et al., 2012
AT2G05710	263348_at	aconitate hydratase, cytoplasmic, putative / citrate hydro-lyase/aconitase, putative | chr2:2141399-2146678 FORWARD	Law et al., 2012
AT2G11270	265975_at	citrate synthase-related | chr2:4484720-4485308 FORWARD	Law et al., 2012
AT2G13440	263053_at	glucose-inhibited division family A protein similar to predicted protein [Physcomitrella patens subsp. patens] (GB:EDQ82685.1); similar to glucose-inhibited division A family protein [Musa acuminata] (GB:ABF72028.1); similar to glucose-inhibited division A family protein [Musa balbisiana] (GB:ABF70103.1); contains InterPro domain Pyridine nucleotide-disulphide oxidoreductase, class I; (InterPro:I…	Law et al., 2012
AT2G13560	263717_at	malate oxidoreductase, putative | chr2:5649964-5655320 FORWARD	Law et al., 2012
AT2G14120	263278_at	dynamin-like protein 2b (ADL2b) Identical to Dynamin-related protein 3B (DRP3B) [Arabidopsis Thaliana] (GB:Q8LFT2;GB:Q8LPH8;GB:Q8S8A4;GB:Q8S943;GB:Q9SI47); similar to ADL2 (ARABIDOPSIS DYNAMIN-LIKE 2), GTP binding / GTPase [Arabidopsis thaliana] (TAIR:AT4G33650.1); similar to hypothetical protein [Vitis vinifera] (GB:CAN69849.1); similar to unnamed protein product [Vitis vinifera] (GB:CAO64742.1)…	Law et al., 2012
AT2G14170	263275_at	ALDH6B2 (Aldehyde dehydrogenase 6B2); 3-chloroallyl aldehyde dehydrogenase Arabidopsis thaliana methylmalonate-semialdehyde dehydrogenase Identical to Methylmalonate-semialdehyde dehydrogenase [acylating], mitochondrial precursor (ALDH6B2) [Arabidopsis Thaliana] (GB:Q0WM29;GB:Q9SI43); similar to ALDH2C4 (REDUCED EPIDERMAL FLUORESCENCE1), 3-chloroallyl aldehyde dehydrogenase/ aldehyde dehydrogenas…	Law et al., 2012
AT2G15310	263297_at	ATARFB1A (ADP-ribosylation factor B1A); GTP binding A member of ARF GTPase family. A thaliana has 21 members of this family, known to be essential for vesicle coating and uncoating and functions in GTP-binding. Gene encoding ADP-ribosylation factor and similar to ADP-ribosylation factor (GI:861205) (Chlamydomonas reinhardtii), other ARFs and ARF-like proteins. Identical to Probable ADP-ribosylati…	Law et al., 2012
AT2G15620	265475_at	NIR1 (NITRITE REDUCTASE); ferredoxin-nitrate reductase involved in the second step of nitrate assimilation Identical to Ferredoxin--nitrite reductase, chloroplast precursor (NIR1) [Arabidopsis Thaliana] (GB:Q39161;GB:Q8H163;GB:Q8H164); similar to SIR (sulfite reductase), sulfite reductase (ferredoxin) [Arabidopsis thaliana] (TAIR:AT5G04590.1); similar to nitrite reductase [Nicotiana tabacum] (GB:…	Law et al., 2012
AT2G15630	257395_at	pentatricopeptide (PPR) repeat-containing protein	Law et al., 2012
AT2G15690	265474_at	pentatricopeptide (PPR) repeat-containing protein	Law et al., 2012
AT2G15820	265484_at	pentatricopeptide (PPR) repeat-containing protein	Law et al., 2012
AT2G16370	263601_s_at	Encodes a bifunctional dihydrofolate reductase - thymidylate synthase gene. This is unique in Arabidopsis and protozoa. Other organisms have independent genes for this function.	Law et al., 2012
AT2G16460	263555_at	similar to unknown protein [Arabidopsis thaliana] (TAIR:AT3G51090.1); similar to Os06g0713100 [Oryza sativa (japonica cultivar-group)] (GB:NP_001058564.1); similar to unnamed protein product [Vitis vinifera] (GB:CAO48264.1); contains InterPro domain Protein of unknown function DUF1640 (InterPro:IPR012439)	Law et al., 2012
AT2G16580	263238_at	auxin-responsive protein, putative similar to auxin-responsive family protein [Arabidopsis thaliana] (TAIR:AT4G34760.1); similar to hypothetical protein [Vitis vinifera] (GB:CAN82489.1); contains InterPro domain Auxin responsive SAUR protein (InterPro:IPR003676)	Law et al., 2012
AT2G16710	265358_AT	Iron-sulphur cluster biosynthesis family protein; FUNCTIONS IN: iron-sulfur cluster binding, structural molecule activity; INVOLVED IN: iron-sulfur cluster assembly; EXPRESSED IN: 24 plant structures; EXPRESSED DURING: 15 growth stages; CONTAINS InterPro DOMAIN/s: FeS cluster insertion, C-terminal, conserved site (InterPro:IPR017870), FeS cluster biogenesis (InterPro:IPR000361), FeS cluster inser…	Law et al., 2012
AT2G16810	265407_at	F-box family protein (FBX8) Identical to F-box only protein 8 (FBX8) [Arabidopsis Thaliana] (GB:Q84X43;GB:Q9SLD8); similar to F-box protein-related [Arabidopsis thaliana] (TAIR:AT2G40910.2); similar to F-box protein-related [Arabidopsis thaliana] (TAIR:AT2G40910.1); similar to hypothetical protein [Vitis vinifera] (GB:CAN70931.1); contains InterPro domain F-box associated type 3 (InterPro:IPR0131…	Law et al., 2012
AT2G16930	266535_s_at	50S ribosomal protein L27	Law et al., 2012
AT2G17130	263583_at	Symbols: IDH2 | IDH2 (ISOCITRATE DEHYDROGENASE SUBUNIT 2); isocitrate dehydrogenase (NAD+)/ oxidoreductase, acting on the CH-OH group of donors, NAD or NADP as acceptor | chr2:7460814-7462554 REVERSE	Law et al., 2012
AT2G17270	264906_at	phosphate transporter 3;3 (PHT3;3); FUNCTIONS IN: binding; INVOLVED IN: transport, transmembrane transport; LOCATED IN: mitochondrial inner membrane, membrane; EXPRESSED IN: 20 plant structures; EXPRESSED DURING: 8 growth stages; CONTAINS InterPro DOMAIN/s: Mitochondrial substrate carrier (InterPro:IPR001993), Mitochondrial substrate/solute carrier (InterPro:IPR018108); BEST Arabidopsis thaliana …	Law et al., 2012
AT2G17280	264907_at	phosphoglycerate/bisphosphoglycerate mutase family protein	Law et al., 2012
AT2G17380	264847_at	AP19 (associated protein 19); ATP binding / protein binding / protein kinase Encodes clathrin assembly protein AP19. similar to clathrin adaptor complex small chain family protein [Arabidopsis thaliana] (TAIR:AT4G35410.2); similar to hypothetical protein [Vitis vinifera] (GB:CAN79566.1); contains InterPro domain Longin-like; (InterPro:IPR011012); contains InterPro domain Protein kinase, core; (In…	Law et al., 2012
AT2G17650	264589_at	AMP-dependent synthetase and ligase family protein similar to AMP-dependent synthetase and ligase family protein [Arabidopsis thaliana] (TAIR:AT1G20560.1); similar to Putative AMP-binding protein [Oryza sativa (japonica cultivar-group)] (GB:AAN05508.1); similar to unnamed protein product [Vitis vinifera] (GB:CAO49648.1); similar to Os03g0133500 [Oryza sativa (japonica cultivar-group)] (GB:NP_0010…	Law et al., 2012
AT2G17670	264591_at	pentatricopeptide (PPR) repeat-containing protein similar to MEE40 (maternal effect embryo arrest 40)	Law et al., 2012
AT2G18400	265338_at	50S ribosomal protein L6	Law et al., 2012
AT2G18450	265329_at	SDH1-2 (Succinate dehydrogenase 1-2)	Law et al., 2012
AT2G18520	265931_at	pentatricopeptide (PPR) repeat-containing protein	Law et al., 2012
AT2G18700	266072_at	ATTPS11 (Arabidopsis thaliana trehalose phosphatase/synthase 11); transferase, transferring glycosyl groups Encodes an enzyme putatively involved in trehalose biosynthesis. The protein has a trehalose synthase (TPS)-like domain that may or may not be active as well as a trehalose phosphatase (TPP)-like domain. similar to ATTPS9 (Arabidopsis thaliana trehalose-phosphatase/synthase 9), transferase,…	Law et al., 2012
AT2G19080	267442_at	metaxin-related	Law et al., 2012
AT2G19180	267444_at	similar to unknown protein [Arabidopsis thaliana] (TAIR:AT1G78890.1); similar to unknown [Populus trichocarpa] (GB:ABK96198.1)	Law et al., 2012
AT2G19280	267331_at	pentatricopeptide (PPR) repeat-containing protein similar to UDP-glucoronosyl/UDP-glucosyl transferase family protein	Law et al., 2012
AT2G19680	266696_at	ATP synthase g subunit	Law et al., 2012
AT2G19860	266702_at	HXK2 (HEXOKINASE 2); ATP binding / fructokinase/ glucokinase/ hexokinase	Law et al., 2012
AT2G19900	266690_at	Symbols: ATNADP-ME1 | ATNADP-ME1 (NADP-malic enzyme 1); malate dehydrogenase (oxaloacetate-decarboxylating) (NADP+)/ malic enzyme/ oxidoreductase, acting on NADH or NADPH, NAD or NADP as acceptor | chr2:8591899-8595478 REVERSE	Law et al., 2012
AT2G20060	265594_at	50S ribosomal protein L4	Law et al., 2012
AT2G20360	265286_at		Law et al., 2012
AT2G20420	265257_at	succinyl-CoA ligase (GDP-forming) beta-chain, mitochondrial, putative / succinyl-CoA synthetase, beta chain, putative / SCS-beta, putative | chr2:8805453-8808120 FORWARD	Law et al., 2012
AT2G20510	263395_at	ATTIM44-1 (Arabidopsis thaliana translocase inner membrane subunit 44-1)	Law et al., 2012
AT2G20530	263375_s_at	prohibitin 6 (PHB6); INVOLVED IN: biological_process unknown; LOCATED IN: mitochondrion, plasma membrane, mitochondrial respiratory chain complex I, respiratory chain complex I, membrane; EXPRESSED IN: 11 plant structures; EXPRESSED DURING: M germinated pollen stage; CONTAINS InterPro DOMAIN/s: Prohibitin (InterPro:IPR000163), Band 7 protein (InterPro:IPR001107); BEST Arabidopsis thaliana protein…	Law et al., 2012
AT2G20710	265429_at	pentatricopeptide (PPR) repeat-containing protein	Law et al., 2012
AT2G20800	265422_at	NDB4 (NAD(P)H DEHYDROGENASE B4); NADH dehydrogenase	Law et al., 2012
AT2G21170	264018_at	TIM (TRIOSEPHOSPHATE ISOMERASE); triose-phosphate isomerase Encodes a nuclear triosephosphate isomerase. Identical to Triosephosphate isomerase, chloroplast precursor (TIM) [Arabidopsis Thaliana] (GB:Q9SKP6); similar to ATCTIMC (CYTOSOLIC TRIOSE PHOSPHATE ISOMERASE), triose-phosphate isomerase [Arabidopsis thaliana] (TAIR:AT3G55440.1); similar to Triosephosphate isomerase, chloroplast precursor (…	Law et al., 2012
AT2G21210	264014_at	auxin-responsive protein, putative Putative auxin-regulated protein whose expression is downregulated in response to chitin oligomers. similar to auxin-responsive protein, putative [Arabidopsis thaliana] (TAIR:AT4G38840.1); similar to hypothetical protein [Vitis vinifera] (GB:CAN62605.1); contains InterPro domain Auxin responsive SAUR protein (InterPro:IPR003676)	Law et al., 2012
AT2G21220	264016_at	auxin-responsive protein, putative similar to auxin-responsive protein, putative [Arabidopsis thaliana] (TAIR:AT4G38860.1); similar to hypothetical protein [Vitis vinifera] (GB:CAN82489.1); contains InterPro domain Auxin responsive SAUR protein (InterPro:IPR003676)	Law et al., 2012
AT2G21290	263759_at	Identical to 30S ribosomal protein S31, mitochondrial precursor [Arabidopsis Thaliana] (GB:Q9SJU8); similar to unnamed protein product [Vitis vinifera] (GB:CAO47252.1); similar to hypothetical protein [Vitis vinifera] (GB:CAN75923.1)	Law et al., 2012
AT2G21410	263764_at	VHA-A2 (VACUOLAR PROTON ATPASE A2); ATPase Vacuolar proton ATPase subunit VHA-a isoform 2. Localized in the tonoplast. similar to VHA-A1 (VACUOLAR PROTON ATPASE A 1), ATPase [Arabidopsis thaliana] (TAIR:AT2G28520.1); similar to VHA-A3 (VACUOLAR PROTON ATPASE A3), ATPase [Arabidopsis thaliana] (TAIR:AT4G39080.1); similar to unnamed protein product [Vitis vinifera] (GB:CAO47222.1); similar to putat…	Law et al., 2012
AT2G21550	263546_at	Bifunctional dihydrofolate reductase/thymidylate synthase; FUNCTIONS IN: thymidylate synthase activity, dihydrofolate reductase activity; INVOLVED IN: oxidation reduction, glycine biosynthetic process, one-carbon metabolic process, nucleotide biosynthetic process, dTMP biosynthetic process; EXPRESSED IN: stem, hypocotyl, root; CONTAINS InterPro DOMAIN/s: Dihydrofolate reductase domain (InterPro:I…	Law et al., 2012
AT2G21640	263515_at	unknown protein, up-regulated by oxidative stress	Law et al., 2012
AT2G21870	263874_at	Identical to Probable ATP synthase 24 kDa subunit, mitochondrial precursor [Arabidopsis Thaliana] (GB:Q9SJ12;GB:Q8LBN3); similar to unnamed protein product [Vitis vinifera] (GB:CAO71749.1)	Law et al., 2012
AT2G22290	263458_at	AtRABH1d (Arabidopsis Rab GTPase homolog H1d); GTP binding similar to AtRABH1e (Arabidopsis Rab GTPase homolog H1e), GTP binding [Arabidopsis thaliana] (TAIR:AT5G10260.1); similar to unnamed protein product [Vitis vinifera] (GB:CAO66868.1); contains InterPro domain Ras GTPase; (InterPro:IPR001806); contains InterPro domain Ras (InterPro:IPR013753); contains InterPro domain Small GTP-binding prote…	Law et al., 2012
AT2G22410	264047_at	pentatricopeptide (PPR) repeat-containing protein	Law et al., 2012
AT2G22480	264044_at	PFK5 (PHOSPHOFRUCTOKINASE 5); 6-phosphofructokinase	Law et al., 2012
AT2G22500	264000_at	Encodes one of the mitochondrial dicarboxylate carriers (DIC): DIC1 (AT2G22500), DIC2 (AT4G24570), DIC3 (AT5G09470).	Law et al., 2012
AT2G22520	263997_at	unknown protein	Law et al., 2012
AT2G23890	266574_at	5' nucleotidase family protein similar to 5' nucleotidase family protein [Arabidopsis thaliana] (TAIR:AT1G75210.1); similar to Os09g0424600 [Oryza sativa (japonica cultivar-group)] (GB:NP_001063218.1); similar to hypothetical protein OsI_030383 [Oryza sativa (indica cultivar-group)] (GB:EAZ09151.1); similar to unnamed protein product [Vitis vinifera] (GB:CAO66591.1); contains InterPro domain Puri…	Law et al., 2012
AT2G24120	265991_at	SCABRA 3 (SCA3); FUNCTIONS IN: DNA-directed RNA polymerase activity, protein binding, DNA binding; INVOLVED IN: transcription; LOCATED IN: mitochondrion; EXPRESSED IN: 21 plant structures; EXPRESSED DURING: 13 growth stages; CONTAINS InterPro DOMAIN/s: DNA-directed RNA polymerase, bacteriophage type (InterPro:IPR002092); BEST Arabidopsis thaliana protein match is: male gametophyte defective 3 (TA…	Law et al., 2012
AT2G24270	265998_at	ALDH11A3; 3-chloroallyl aldehyde dehydrogenase/ glyceraldehyde-3-phosphate dehydrogenase (NADP+)	Law et al., 2012
AT2G25680	265897_at	MOT1 (MOLYBDATE TRANSPORTER 1); molybdate ion transmembrane transporter/ sulfate transmembrane transporter Encodes a high-affinity molybdate transporter. Mutant has reduced concentrations of molybdate in roots and shoots, and reduced shoot and root length when growing on Mo-limited medium. similar to sulfate transmembrane transporter [Arabidopsis thaliana] (TAIR:AT1G80310.1); similar to putative …	Law et al., 2012
AT2G25840	266648_at	OVA4 (OVULE ABORTION 4); ATP binding / aminoacyl-tRNA ligase similar to putative tryptophanyl-tRNA synthetase [Oryza sativa (japonica cultivar-group)] (GB:BAD87908.1); contains InterPro domain Tryptophanyl-tRNA synthetase, class Ib; (InterPro:IPR002306); contains InterPro domain Aminoacyl-tRNA synthetase, class Ib; (InterPro:IPR002305); contains InterPro domain Aminoacyl-tRNA synthetase, class I,…	Law et al., 2012
AT2G26080	266892_at	AtGLDP2 (Arabidopsis thaliana glycine decarboxylase P-protein 2); ATP binding / glycine dehydrogenase (decarboxylating)	Law et al., 2012
AT2G26140	266842_at	FTSH4 (FtsH protease 4); ATP-dependent peptidase/ ATPase/ metallopeptidase	Law et al., 2012
AT2G26240	267400_at	Identical to UPF0136 membrane protein At2g26240 [Arabidopsis Thaliana] (GB:O64847); similar to unknown protein [Arabidopsis thaliana] (TAIR:AT3G43520.1); similar to predicted protein [Physcomitrella patens subsp. patens] (GB:EDQ63811.1); contains InterPro domain Protein of unknown function UPF0136, Transmembrane; (InterPro:IPR005349)	Law et al., 2012
AT2G26330	267376_at	ER (ERECTA) Homologous to receptor protein kinases. Involved in specification of organs originating from the shoot apical meristem. Contains a cytoplasmic protein kinase catalytic domain, a transmembrane region, and an extracellular leucine-rich repeat. ER has been identified as a quantitative trait locus for transpiration efficiency by influencing epidermal and mesophyll development, stomatal de…	Law et al., 2012
AT2G26360	245031_at	Mitochondrial substrate carrier family protein; FUNCTIONS IN: binding; INVOLVED IN: transport, mitochondrial transport, transmembrane transport; LOCATED IN: mitochondrial inner membrane, membrane; EXPRESSED IN: 23 plant structures; EXPRESSED DURING: 13 growth stages; CONTAINS InterPro DOMAIN/s: Mitochondrial carrier protein (InterPro:IPR002067), Mitochondrial substrate carrier (InterPro:IPR001993…	Law et al., 2012
AT2G26540	245042_at	HEMD; uroporphyrinogen-III synthase	Law et al., 2012
AT2G26770	267608_at	plectin-related similar to 3'-5'-exoribonuclease/ RNA binding [Arabidopsis thaliana] (TAIR:AT2G40820.1); similar to unnamed protein product [Vitis vinifera] (GB:CAO18229.1)	Law et al., 2012
AT2G26790	266853_at	pentatricopeptide (PPR) repeat-containing protein	Law et al., 2012
AT2G26800	266864_at	hydroxymethylglutaryl-CoA lyase, putative / 3-hydroxy-3-methylglutarate-CoA lyase, putative / HMG-CoA lyase, putative similar to MAM1 (2-isopropylmalate synthase 3), 2-isopropylmalate synthase [Arabidopsis thaliana] (TAIR:AT5G23010.1); similar to unnamed protein product [Vitis vinifera] (GB:CAO67270.1); contains InterPro domain Pyruvate carboxyltransferase; (InterPro:IPR000891); contains InterPro…	Law et al., 2012
AT2G27730	266206_at		Law et al., 2012
AT2G27775	266264_at	similar to unknown protein [Arabidopsis thaliana] (TAIR:AT2G27800.1); similar to unknown [Populus trichocarpa] (GB:ABK95440.1)	Law et al., 2012
AT2G27800	266241_s_at	binding similar to pentatricopeptide (PPR) repeat-containing protein	Law et al., 2012
AT2G28000	264069_at	CPN60A (chloroplast / 60 kDa chaperonin alpha subunit); ATP binding / protein binding / unfolded protein binding Encodes chaperonin-60 alpha, a molecular chaperone involved in Rubisco folding. Mutants display aberrant chloroplast and embryo development. Identical to RuBisCO large subunit-binding protein subunit alpha, chloroplast precursor [Arabidopsis Thaliana] (GB:P21238;GB:Q42554); similar to …	Law et al., 2012
AT2G29080	266777_at	FTSH3 (FtsH protease 3); ATP-dependent peptidase/ ATPase encodes an FtsH protease that is localized to the mitochondrion similar to FTSH10 (FtsH protease 10), ATPase [Arabidopsis thaliana] (TAIR:AT1G07510.1); similar to hypothetical protein OsI_019542 [Oryza sativa (indica cultivar-group)] (GB:EAY98309.1); similar to AAA-metalloprotease FtsH [Pisum sativum] (GB:AAK77908.1); similar to unnamed pro…	Law et al., 2012
AT2G29530	266239_at	TIM10 (Arabidopsis thaliana translocase inner membrane subunit 10); P-P-bond-hydrolysis-driven protein transmembrane transporter	Law et al., 2012
AT2G29560	266266_at	enolase, putative	Law et al., 2012
AT2G29990	266835_at	NDA2 (ALTERNATIVE NAD(P)H DEHYDROGENASE 2); NADH dehydrogenase	Law et al., 2012
AT2G30160	267274_at	Mitochondrial substrate carrier family protein; FUNCTIONS IN: transporter activity, binding; INVOLVED IN: transport, mitochondrial transport, transmembrane transport; LOCATED IN: mitochondrial inner membrane, membrane; EXPRESSED IN: 22 plant structures; EXPRESSED DURING: 15 growth stages; CONTAINS InterPro DOMAIN/s: Mitochondrial carrier protein (InterPro:IPR002067), Mitochondrial substrate carri…	Law et al., 2012
AT2G30320	255864_at	tRNA pseudouridine synthase family protein Identical to Putative tRNA pseudouridine synthase [Arabidopsis Thaliana] (GB:O22928); similar to tRNA pseudouridine synthase family protein [Arabidopsis thaliana] (TAIR:AT1G76120.1); similar to unnamed protein product [Vitis vinifera] (GB:CAO21340.1); contains InterPro domain tRNA pseudouridine synthase; (InterPro:IPR001406)	Law et al., 2012
AT2G30390	267471_at	ferrochelatase II	Law et al., 2012
AT2G30500	267518_at	kinase interacting family protein similar to kinase interacting protein-related [Arabidopsis thaliana] (TAIR:AT5G58320.2); similar to unnamed protein product [Vitis vinifera] (GB:CAO21303.1); contains InterPro domain KIP1-like (InterPro:IPR011684)	Law et al., 2012
AT2G30780	267568_at	pentatricopeptide (PPR) repeat-containing protein	Law et al., 2012
AT2G30920	267210_at	Dihydroxypoly-prenylbenzoate methyltransfer-ase (UbiG)	Law et al., 2012
AT2G30970	267151_at	ASP1 (ASPARTATE AMINOTRANSFERASE 1) ASPARTATE AMINOTRANSFERASE 1 Identical to Aspartate aminotransferase, mitochondrial precursor (ASP1) [Arabidopsis Thaliana] (GB:P46643); similar to ASP2 (ASPARTATE AMINOTRANSFERASE 2) [Arabidopsis thaliana] (TAIR:AT5G19550.1); similar to unnamed protein product [Vitis vinifera] (GB:CAO69903.1); similar to hypothetical protein OsI_022516 [Oryza sativa (indica cu…	Law et al., 2012
AT2G31170	266478_at	tRNA synthetase class I (C) family protein similar to tRNA synthetase class I (C) family protein [Arabidopsis thaliana] (TAIR:AT5G38830.1); similar to unnamed protein product [Vitis vinifera] (GB:CAO44332.1); similar to hypothetical protein OsI_031279 [Oryza sativa (indica cultivar-group)] (GB:EAZ10047.1); similar to unnamed protein product [Vitis vinifera] (GB:CAO42791.1); contains InterPro doma…	Law et al., 2012
AT2G31390	263250_at	pfkB-type carbohydrate kinase family protein	Law et al., 2012
AT2G31490	263399_at		Law et al., 2012
AT2G32040	265669_at	mediates folate monoglutamate transport involved in tetrahydrofolate biosynthesis. It also mediates transport of antifolates, such as methotrexate and aminopterin. The gene is expressed in both chloroplast and non-green plastids.	Law et al., 2012
AT2G32630	267086_at	pentatricopeptide (PPR) repeat-containing protein similar to UDP-glucoronosyl/UDP-glucosyl transferase family protein	Law et al., 2012
AT2G33040	267600_at	ATP synthase gamma subunit	Law et al., 2012
AT2G33210	245164_at	chaperonin, putative	Law et al., 2012
AT2G33220	245169_at		Law et al., 2012
AT2G33370	255789_at	60S ribosomal protein L23 (RPL23B) Identical to 60S ribosomal protein L23 (RPL23C) [Arabidopsis Thaliana] (GB:P49690;GB:Q8L8P0;GB:Q9SDB5); similar to EMB2171 (EMBRYO DEFECTIVE 2171), structural constituent of ribosome [Arabidopsis thaliana] (TAIR:AT3G04400.1); similar to 60S ribosomal protein L23 (RPL23A) [Arabidopsis thaliana] (TAIR:AT1G04480.1); similar to ribosomal protein L17 [Castanea sativa…	Law et al., 2012
AT2G33820	257351_at	ATMBAC1; L-histidine transmembrane transporter/ L-lysine transmembrane transporter/ L-ornithine transmembrane transporter/ arginine transmembrane transporter/ binding	Law et al., 2012
AT2G34050	256722_at	similar to unnamed protein product [Vitis vinifera] (GB:CAO66363.1); contains InterPro domain ATP11; (InterPro:IPR010591)	Law et al., 2012
AT2G34370	267047_at	pentatricopeptide (PPR) repeat-containing protein	Law et al., 2012
AT2G34620	266899_at	mitochondrial transcription termination factor-related / mTERF-related	Law et al., 2012
AT2G35030	267420_at	pentatricopeptide (PPR) repeat-containing protein	Law et al., 2012
AT2G35120	266517_at	glycine cleavage system H protein, mitochondrial, putative	Law et al., 2012
AT2G35290	266545_at	similar to unnamed protein product [Vitis vinifera] (GB:CAO63442.1)	Law et al., 2012
AT2G35370	266636_at	GDCH; glycine dehydrogenase (decarboxylating)	Law et al., 2012
AT2G35480	266618_at	similar to unknown protein [Arabidopsis thaliana] (TAIR:AT1G32260.1); similar to unnamed protein product [Vitis vinifera] (GB:CAO63339.1)	Law et al., 2012
AT2G35585	266640_at	similar to unknown protein [Arabidopsis thaliana] (TAIR:AT1G31940.1); similar to hypothetical protein [Vitis vinifera] (GB:CAN79460.1)	Law et al., 2012
AT2G35605	266641_at	SWIB complex BAF60b domain-containing protein similar to SWIB complex BAF60b domain-containing protein [Arabidopsis thaliana] (TAIR:AT1G31760.1); similar to unnamed protein product [Vitis vinifera] (GB:CAO63736.1); contains InterPro domain SWIB/MDM2; (InterPro:IPR003121)	Law et al., 2012
AT2G35790	265798_at	similar to unnamed protein product [Vitis vinifera] (GB:CAO68985.1)	Law et al., 2012
AT2G35795	265826_at	DNAJ heat shock N-terminal domain-containing protein	Law et al., 2012
AT2G35800	263943_at	mitochondrial substrate carrier family protein; FUNCTIONS IN: binding, calcium ion binding; INVOLVED IN: transport, transmembrane transport; LOCATED IN: mitochondrial inner membrane, chloroplast envelope; EXPRESSED IN: 22 plant structures; EXPRESSED DURING: 13 growth stages; CONTAINS InterPro DOMAIN/s: Mitochondrial carrier protein (InterPro:IPR002067), EF-Hand 1, calcium-binding site (InterPro:I…	Law et al., 2012
AT2G36070	263939_at	ATTIM44-2 (Arabidopsis thaliana translocase inner membrane subunit 44-2)	Law et al., 2012
AT2G36460	263921_at	fructose-bisphosphate aldolase, putative	Law et al., 2012
AT2G36530	263924_at	LOS2; copper ion binding / phosphopyruvate hydratase	Law et al., 2012
AT2G36580,AT3G52990	263922_s_at	) pyruvate kinase, putative	Law et al., 2012
AT2G36980	263887_at	pentatricopeptide (PPR) repeat-containing protein	Law et al., 2012
AT2G37320	266003_at	pentatricopeptide (PPR) repeat-containing protein	Law et al., 2012
AT2G37410	265968_at	ATTIM17-2 (Arabidopsis thaliana translocase inner membrane subunit 17-2); P-P-bond-hydrolysis-driven protein transmembrane transporter	Law et al., 2012
AT2G37890	266109_at	Mitochondrial substrate carrier family protein; FUNCTIONS IN: binding, transporter activity; INVOLVED IN: transport, mitochondrial transport, transmembrane transport; LOCATED IN: mitochondrial inner membrane, membrane; EXPRESSED IN: 19 plant structures; EXPRESSED DURING: 8 growth stages; CONTAINS InterPro DOMAIN/s: Mitochondrial carrier protein (InterPro:IPR002067), Mitochondrial substrate carrie…	Law et al., 2012
AT2G38280	267095_at	FAC1 (EMBRYONIC FACTOR1); AMP deaminase	Law et al., 2012
AT2G38420	267031_at	pentatricopeptide (PPR) repeat-containing protein	Law et al., 2012
AT2G38660	266400_at	tetrahydrofolate dehydrogenase/cyclohydrolase, putative/Amino acid dehydrogenase family protein; FUNCTIONS IN: binding, catalytic activity; INVOLVED IN: folic acid and derivative biosynthetic process, metabolic process;	Law et al., 2012
AT2G38670	266399_at	PECT1 (PHOSPHORYLETHANOLAMINE CYTIDYLYLTRANSFERASE 1); ethanolamine-phosphate cytidylyltransferase	Law et al., 2012
AT2G38970	266187_at	zinc finger (C3HC4-type RING finger) family protein similar to zinc finger (C3HC4-type RING finger) family protein [Arabidopsis thaliana] (TAIR:AT3G54780.2); similar to zinc finger (C3HC4-type RING finger) family protein [Arabidopsis thaliana] (TAIR:AT3G54780.3); similar to zinc finger (C3HC4-type RING finger) family protein [Arabidopsis thaliana] (TAIR:AT3G54780.1); similar to hypothetical prote…	Law et al., 2012
AT2G39120	266197_at	Ubiq. C-term. hydrolase	Law et al., 2012
AT2G39230	267011_at	pentatricopeptide (PPR) repeat-containing protein	Law et al., 2012
AT2G39290	266991_at	PGP1/PGPS1/PGS1 (PHOSPHATIDYLGLYCEROLPHOSPHATE SYNTHASE 1); CDP-alcohol phosphatidyltransferase/ CDP-diacylglycerol-glycerol-3-phosphate 3-phosphatidyltransferase Encodes a phosphatidylglycerolphosphate synthase 2C which is dual-targeted into chloroplasts and mitochondria. Mutant plants have mutant chloroplasts but normal mitochondria. similar to PGPS2 (phosphatidylglycerolphosphate synthase 2), …	Law et al., 2012
AT2G39795	245063_at	mitochondrial glycoprotein family protein / MAM33 family protein Identical to Uncharacterized protein At2g39795, mitochondrial precursor [Arabidopsis Thaliana] (GB:Q8W487); similar to mitochondrial glycoprotein family protein / MAM33 family protein [Arabidopsis thaliana] (TAIR:AT3G55605.1); similar to unnamed protein product [Vitis vinifera] (GB:CAO69135.1); contains InterPro domain Mitochondrial…	Law et al., 2012
AT2G39970	267363_at	Mitochondrial substrate carrier family protein; FUNCTIONS IN: binding; INVOLVED IN: transport, transmembrane transport; LOCATED IN: mitochondrial inner membrane, peroxisomal membrane, plasma membrane; EXPRESSED IN: 23 plant structures; EXPRESSED DURING: 15 growth stages; CONTAINS InterPro DOMAIN/s: Mitochondrial substrate carrier (InterPro:IPR001993), Mitochondrial substrate/solute carrier (Inter…	Law et al., 2012
AT2G40240	263822_at	pentatricopeptide (PPR) repeat-containing protein	Law et al., 2012
AT2G40490	255826_at	HEME2; uroporphyrinogen decarboxylase	Law et al., 2012
AT2G40765	266059_at	6.7 kDa subunit	Law et al., 2012
AT2G40800	266047_at	similar to unknown protein [Arabidopsis thaliana] (TAIR:AT3G56430.1); similar to unnamed protein product [Vitis vinifera] (GB:CAO41325.1); contains InterPro domain Mitochondrial import inner membrane translocase, subunit Tim21 (InterPro:IPR013261)	Law et al., 2012
AT2G41250	266363_at	haloacid dehalogenase-like hydrolase family protein similar to haloacid dehalogenase-like hydrolase family protein [Arabidopsis thaliana] (TAIR:AT1G14310.1); similar to unnamed protein product [Vitis vinifera] (GB:CAO63058.1); contains InterPro domain Haloacid dehydrogenase/epoxide hydrolase; (InterPro:IPR005833); contains InterPro domain Haloacid dehalogenase-like hydrolase; (InterPro:IPR005834)…	Law et al., 2012
AT2G41380	266368_at	embryo-abundant protein-related similar to embryo-abundant protein-related [Arabidopsis thaliana] (TAIR:AT5G10830.1); similar to unknown [Populus trichocarpa x Populus deltoides] (GB:ABK96242.1); contains InterPro domain Methyltransferase type 11; (InterPro:IPR013216)	Law et al., 2012
AT2G41730	260522_x_at	similar to unknown protein [Arabidopsis thaliana] (TAIR:AT5G24640.1); similar to unnamed protein product [Vitis vinifera] (GB:CAO14635.1)	Law et al., 2012
AT2G42210	267638_at		Law et al., 2012
AT2G42310	265883_at		Law et al., 2012
AT2G42450	265879_at	lipase class 3 family protein similar to lipase class 3 family protein [Arabidopsis thaliana] (TAIR:AT3G14075.1); similar to unnamed protein product [Vitis vinifera] (GB:CAO70686.1); contains InterPro domain Lipase, class 3; (InterPro:IPR002921)	Law et al., 2012
AT2G42600	263491_at	ATPPC2 (PHOSPHOENOLPYRUVATE CARBOXYLASE 2); catalytic/ phosphoenolpyruvate carboxylase	Law et al., 2012
AT2G42790	263986_at	Citrate synthase	Law et al., 2012
AT2G43400	260536_at	electron-transfer flavoprotein:ubiquinone oxidoreductase; catalytic/ electron carrier/ electron-transferring-flavoprotein dehydrogenase | chr2:18021180-18025292 FORWARD	Law et al., 2012
AT2G43750	260566_at	OASB (O-ACETYLSERINE (THIOL) LYASE B); cysteine synthase Arabidopsis thaliana O-acetylserine (thiol) lyase (OAS-TL) isoform oasB, the key enzyme for fixation of inorganic sulfide. It catalyzes the formation of cysteine from O-acetylserine and inorganic sulfide. Identical to Cysteine synthase, chloroplast/chromoplast precursor (OASB) [Arabidopsis Thaliana] (GB:P47999;GB:O22828;GB:Q42568); similar …	Law et al., 2012
AT2G43780	260605_at	similar to hypothetical protein OsI_037823 [Oryza sativa (indica cultivar-group)] (GB:EAY83864.1); similar to expressed protein [Oryza sativa (japonica cultivar-group)] (GB:ABA99375.1); similar to Os12g0611700 [Oryza sativa (japonica cultivar-group)] (GB:NP_001067254.1)	Law et al., 2012
AT2G44065	267211_at	50S ribosomal protein L2	Law et al., 2012
AT2G44350	267368_at	Symbols: ATCS, CSY4 | ATCS; ATP binding / ATP citrate synthase/ citrate (SI)-synthase | chr2:18316278-18320789 FORWARD	Law et al., 2012
AT2G44520	267342_at	Involved in COX biogenesis / COX10 (CYTOCHROME C OXIDASE 10); prenyltransferase	Law et al., 2012
AT2G44525	267370_at	similar to unknown protein [Arabidopsis thaliana] (TAIR:AT3G60150.1); similar to unnamed protein product [Vitis vinifera] (GB:CAO70445.1); contains InterPro domain Protein of unknown function DUF498 (InterPro:IPR007523)	Law et al., 2012
AT2G44620	266890_at	Encodes a member of the mitochondrial acyl carrier protein (ACP) family. As part of the mitochondrial matrix, it is likely to be involved in fatty acid or lipoic acid biogenesis. Its acylated form is predominantly present in the mitochondrial membrane while the non-acylated form is soluble.	Law et al., 2012
AT2G44950	266817_at	HUB1 (HISTONE MONO-UBIQUITINATION 1); protein binding / ubiquitin-protein ligase/ zinc ion binding The gene encodes one of two orthologous E3 ubiquitin ligases in Arabidopsis that are involved in monoubiquitination of histone H2B. Identical to E3 ubiquitin-protein ligase BRE1-like 1 (HUB1) [Arabidopsis Thaliana] (GB:Q8RXD6;GB:O22156;GB:O22157); similar to HUB2 (HISTONE MONO-UBIQUITINATION 2) [Ara…	Law et al., 2012
AT2G44950	266818_at	HUB1 (HISTONE MONO-UBIQUITINATION 1); protein binding / ubiquitin-protein ligase/ zinc ion binding The gene encodes one of two orthologous E3 ubiquitin ligases in Arabidopsis that are involved in monoubiquitination of histone H2B. Identical to E3 ubiquitin-protein ligase BRE1-like 1 (HUB1) [Arabidopsis Thaliana] (GB:Q8RXD6;GB:O22156;GB:O22157); similar to HUB2 (HISTONE MONO-UBIQUITINATION 2) [Ara…	Law et al., 2012
AT2G45060	266136_at	similar to unknown protein [Arabidopsis thaliana] (TAIR:AT4G26410.1); similar to unnamed protein product [Vitis vinifera] (GB:CAO70604.1); contains InterPro domain Uncharacterised conserved protein UCP022280 (InterPro:IPR016803)	Law et al., 2012
AT2G45210	245136_at	auxin-responsive protein-related similar to auxin-responsive family protein [Arabidopsis thaliana] (TAIR:AT3G60690.1); similar to unnamed protein product [Vitis vinifera] (GB:CAO24512.1); contains InterPro domain Auxin responsive SAUR protein (InterPro:IPR003676)	Law et al., 2012
AT2G45270	245142_at	Mitochondrial protein essential for embryo development.	Law et al., 2012
AT2G45330	245131_s_at	EMB1067 (EMBRYO DEFECTIVE 1067); tRNA 2'-phosphotransferase similar to tRNA 2'phosphotransferase, putative [Arabidopsis thaliana] (TAIR:AT5G23600.1); similar to unnamed protein product [Vitis vinifera] (GB:CAO24541.1); contains InterPro domain Phosphotransferase KptA/Tpt1; (InterPro:IPR002745)	Law et al., 2012
AT2G46050	266602_at	pentatricopeptide (PPR) repeat-containing protein	Law et al., 2012
AT2G46110	266598_at	KPHMT1/PANB1 (KETOPANTOATE HYDROXYMETHYLTRANSFERASE 1); 3-methyl-2-oxobutanoate hydroxymethyltransferase similar to PANB2, 3-methyl-2-oxobutanoate hydroxymethyltransferase [Arabidopsis thaliana] (TAIR:AT3G61530.2); similar to PANB2, 3-methyl-2-oxobutanoate hydroxymethyltransferase [Arabidopsis thaliana] (TAIR:AT3G61530.1); similar to unnamed protein product [Vitis vinifera] (GB:CAO39648.1); conta…	Law et al., 2012
AT2G46390	263785_at	Succinate dehydrogenase subunit 8	Law et al., 2012
AT2G46470	263778_at	OXA1L (INNER MEMBRANE PROTEIN OXA1-LIKE)	Law et al., 2012
AT2G46505	265456_at	Succinate dehydrogenase subunit 4	Law et al., 2012
AT2G46540	265459_at	similar to unknown [Populus trichocarpa] (GB:ABK93335.1)	Law et al., 2012
AT2G47380	260579_at	Cytochrome c oxidase subunit 5c	Law et al., 2012
AT2G47490	245152_at	mitochondrial substrate carrier family protein	Law et al., 2012
AT2G47510	248461_s_at	FUM1 | FUM1 (FUMARASE 1); catalytic/ fumarate hydratase | chr2:19498368-19502246 FORWARD	Law et al., 2012
AT2G47690	266512_at		Law et al., 2012
AT2G48030	265771_at	endonuclease/exonuclease/phosphatase family protein similar to endonuclease/exonuclease/phosphatase family protein [Arabidopsis thaliana] (TAIR:AT3G21530.1); similar to unnamed protein product [Vitis vinifera] (GB:CAO71059.1); contains InterPro domain Endonuclease/exonuclease/phosphatase (InterPro:IPR005135)	Law et al., 2012
AT3G01020	259262_AT	á Encodes a mitochondrial protein similar to E.coli IscU. In bacteria, IscU is a scaffold protein accepting sulfur and iron to build a transient Fe-S cluster,which is subsequently transferred to a target apoprotein.	Law et al., 2012
AT3G01280	259270_at	porin, putative	Law et al., 2012
AT3G01290	259272_at	band 7 family protein similar to band 7 family protein [Arabidopsis thaliana] (TAIR:AT5G62740.1); similar to hypersensitive-induced response protein [Carica papaya] (GB:ABS01349.1); contains InterPro domain Stomatin; (InterPro:IPR001972); contains InterPro domain Band 7 protein (InterPro:IPR001107)	Law et al., 2012
AT3G01580	259183_at	pentatricopeptide (PPR) repeat-containing protein	Law et al., 2012
AT3G01790	258995_at	50S ribosomal protein L13	Law et al., 2012
AT3G01800	258996_at	ribosome recycling factor family protein / ribosome releasing factor family protein similar to RRF (RIBOSOME RECYCLING FACTOR, CHLOROPLAST PRECURSOR) [Arabidopsis thaliana] (TAIR:AT3G63190.1); similar to unnamed protein product [Vitis vinifera] (GB:CAO14593.1); similar to hypothetical protein [Vitis vinifera] (GB:CAN68423.1); contains InterPro domain Ribosome recycling factor; (InterPro:IPR002661…	Law et al., 2012
AT3G01820	258998_at	adenylate kinase family protein similar to ADK/ATPADK1 (ADENOSINE KINASE), adenylate kinase/ nucleotide kinase [Arabidopsis thaliana] (TAIR:AT2G37250.1); similar to adenylate kinase family-like protein [Solanum tuberosum] (GB:ABB16966.1); contains InterPro domain Adenylate kinase; (InterPro:IPR000850); contains InterPro domain Adenylate/cytidine kinase, N-terminal; (InterPro:IPR011769)	Law et al., 2012
AT3G01910	258948_at	SOX (SULFITE OXIDASE); sulfite oxidase Encodes a homodimeric Mo-enzyme with molybdopterin as organic component of the molybdenum cofactor. It lacks the heme domain that other eukaryotic Mo-enzymes possess and has no redox-active centers other than the molybdenum. SO protein has been found in all parts of the plant. The plant SO combines its enzymatic sulfite oxidation with a subsequent nonenzymat…	Law et al., 2012
AT3G02010	259003_at	pentatricopeptide (PPR) repeat-containing protein	Law et al., 2012
AT3G02090	258862_at	MPPBETA; metalloendopeptidase	Law et al., 2012
AT3G02490	258502_at	pentatricopeptide (PPR) repeat-containing protein	Law et al., 2012
AT3G02660	258475_at	EMB2768 (EMBRYO DEFECTIVE 2768); ATP binding / aminoacyl-tRNA ligase similar to unnamed protein product [Vitis vinifera] (GB:CAO65064.1); contains InterPro domain Aminoacyl-tRNA synthetase, class Ib; (InterPro:IPR002305); contains InterPro domain RNA-binding S4; (InterPro:IPR002942); contains InterPro domain Aminoacyl-tRNA synthetase, class I, conserved site; (InterPro:IPR001412); contains InterP…	Law et al., 2012
AT3G03070	258846_at		Law et al., 2012
AT3G03100	258847_at		Law et al., 2012
AT3G03250	258849_at	UGP (UDP-glucose pyrophosphorylase); UTP:glucose-1-phosphate uridylyltransferase/ nucleotidyltransferase	Law et al., 2012
AT3G04050	258808_at	pyruvate kinase, putative	Law et al., 2012
AT3G04120	258588_s_at	GAPC1 (GLYCERALDEHYDE-3-PHOSPHATE DEHYDROGENASE C SUBUNIT 1); glyceraldehyde-3-phosphate dehydrogenase (phosphorylating)	Law et al., 2012
AT3G04130	258592_at	pentatricopeptide (PPR) repeat-containing protein	Law et al., 2012
AT3G04250	258574_at	F-box family protein-related similar to F-box family protein [Arabidopsis thaliana] (TAIR:AT2G38590.1); contains InterPro domain F-box associated type 1 (InterPro:IPR006527)	Law et al., 2012
AT3G04400	258569_at	EMB2171 (EMBRYO DEFECTIVE 2171); structural constituent of ribosome Identical to 60S ribosomal protein L23 (RPL23C) [Arabidopsis Thaliana] (GB:P49690;GB:Q8L8P0;GB:Q9SDB5); similar to 60S ribosomal protein L23 (RPL23A) [Arabidopsis thaliana] (TAIR:AT1G04480.1); similar to 60S ribosomal protein L23 (RPL23B) [Arabidopsis thaliana] (TAIR:AT2G33370.1); similar to ribosomal protein L17 [Castanea sativa…	Law et al., 2012
AT3G04530	258570_at	PPCK2; kinase/ protein serine/threonine kinase	Law et al., 2012
AT3G04750	258817_at	pentatricopeptide (PPR) repeat-containing protein	Law et al., 2012
AT3G04800	259084_at	ATTIM23-3 (Arabidopsis thaliana translocase inner membrane subunit 23-3); P-P-bond-hydrolysis-driven protein transmembrane transporter	Law et al., 2012
AT3G05290	259306_at	mitochondrial substrate carrier family protein	Law et al., 2012
AT3G05780	258740_at	Lon protease, putative Identical to Putative Lon protease homolog 3, mitochondrial precursor (LON) [Arabidopsis Thaliana] (GB:Q9M9L8); similar to LON_ARA_ARA (Lon protease homolog gene), ATP binding / ATP-dependent peptidase/ serine-type peptidase [Arabidopsis thaliana] (TAIR:AT5G26860.1); similar to Lon protease, putative [Arabidopsis thaliana] (TAIR:AT3G05790.1); similar to hypothetical protein…	Law et al., 2012
AT3G05790	258741_at	Lon protease, putative Identical to Putative Lon protease homolog 4, mitochondrial precursor (LON) [Arabidopsis Thaliana] (GB:Q9M9L7); similar to LON_ARA_ARA (Lon protease homolog gene), ATP binding / ATP-dependent peptidase/ serine-type peptidase [Arabidopsis thaliana] (TAIR:AT5G26860.1); similar to Lon protease, putative [Arabidopsis thaliana] (TAIR:AT3G05780.1); similar to putative ATP-depende…	Law et al., 2012
AT3G06040	258466_at	50S ribosomal protein L12	Law et al., 2012
AT3G06050	258469_at	ATPRXIIF/PRXIIF (PEROXIREDOXIN IIF); antioxidant/ peroxidase	Law et al., 2012
AT3G06200	256401_at	guanylate kinase, putative similar to GK-1 (GUANYLATE KINASE 1), guanylate kinase [Arabidopsis thaliana] (TAIR:AT2G41880.1); similar to unnamed protein product [Vitis vinifera] (GB:CAO71080.1); contains InterPro domain Guanylate kinase (InterPro:IPR008144); contains InterPro domain Guanylate kinase/L-type calcium channel region (InterPro:IPR008145)	Law et al., 2012
AT3G06310	258881_at		Law et al., 2012
AT3G06320	249975_s_at	50S ribosomal protein L33	Law et al., 2012
AT3G06483	258902_at	PDK (PYRUVATE DEHYDROGENASE KINASE); ATP binding / pyruvate dehydrogenase (acetyl-transferring) kinase	Law et al., 2012
AT3G06650	258515_at	Symbols: ACLB-1 | ACLB-1; ATP citrate synthase | chr3:2079033-2083291 REVERSE	Law et al., 2012
AT3G06850	258527_at	DIN3/LTA1 (DARK INDUCIBLE 3); alpha-ketoacid dehydrogenase dihydrolipoamide branched chain acyltransferase similar to dihydrolipoamide S-acetyltransferase, putative [Arabidopsis thaliana] (TAIR:AT1G54220.2); similar to dihydrolipoamide S-acetyltransferase, putative [Arabidopsis thaliana] (TAIR:AT1G54220.1); similar to unnamed protein product [Vitis vinifera] (GB:CAO44807.1); contains InterPro dom…	Law et al., 2012
AT3G07420	259022_at	NS2 (asparaginyl-tRNA synthetase 2) Encodes an asparaginyl-tRNA synthetase. Identical to Asparaginyl-tRNA synthetase, cytoplasmic 2 (SYNC2) [Arabidopsis Thaliana] (GB:Q9SW95;GB:O48594;GB:Q8GZ48;GB:Q9SRS4); similar to SYNC1 (EMBRYO DEFECTIVE 2755), ATP binding / aminoacyl-tRNA ligase/ asparagine-tRNA ligase/ aspartate-tRNA ligase/ nucleic acid binding / nucleotide binding [Arabidopsis thaliana] (T…	Law et al., 2012
AT3G07480	259016_at	electron carrier/ iron-sulfur cluster binding	Law et al., 2012
AT3G07770	259248_at	ATP binding similar to CR88 (EMBRYO DEFECTIVE 1956), ATP binding [Arabidopsis thaliana] (TAIR:AT2G04030.2); similar to CR88 (EMBRYO DEFECTIVE 1956), ATP binding [Arabidopsis thaliana] (TAIR:AT2G04030.1); similar to hypothetical protein [Vitis vinifera] (GB:CAN79988.1); similar to unnamed protein product [Vitis vinifera] (GB:CAO41190.1); similar to hypothetical protein OsJ_034872 [Oryza sativa (ja…	Law et al., 2012
AT3G08580	258680_at	AAC1 (ADP/ATP CARRIER 1); ATP:ADP antiporter/ binding	Law et al., 2012
AT3G08590	258679_at	2,3-biphosphoglycerate-independent phosphoglycerate mutase, putative / phosphoglyceromutase, putative	Law et al., 2012
AT3G08610	258681_at		Law et al., 2012
AT3G08820	258991_at	pentatricopeptide (PPR) repeat-containing protein	Law et al., 2012
AT3G08950	258987_at	Involved in COX biogenesis / electron transport SCO1/SenC family protein	Law et al., 2012
AT3G08980	259199_at	signal peptidase I family protein	Law et al., 2012
AT3G09700	258716_at	DNAJ heat shock N-terminal domain-containing protein	Law et al., 2012
AT3G09810	258655_at	isocitrate dehydrogenase, putative / NAD+ isocitrate dehydrogenase, putative	Law et al., 2012
AT3G10140	258934_at	Encodes a gene involved in plant mitochondrial recombination surveillance. Disruption of this gene in combination with a mutation in MSH1 results in extensive rearrangement of the mitochondrial genome and dramatic changes in plant growth.	Law et al., 2012
AT3G10160	258927_at	Encodes a protein with tetrahydrofolylpolyglutamate synthase activity that is located in the mitochondrial matrix. One of the three folylpolyglutamate synthetase isoforms (FPGSs): FPGS1 (At5g05980, plastidic), FPGS2 (At3g10160, mitochondrial) and FPGS3 (At3g55630, cytosolic).	Law et al., 2012
AT3G10260	259154_at	reticulon family protein similar to reticulon family protein (RTNLB6) [Arabidopsis thaliana] (TAIR:AT3G61560.1); similar to unnamed protein product [Vitis vinifera] (GB:CAO69968.1); contains InterPro domain Reticulon; (InterPro:IPR003388)	Law et al., 2012
AT3G10270	259138_s_at	Protein targeting to mitochondria is influenced by UTR sequences.	Law et al., 2012
AT3G10370	259146_at	glycerol-3-phosphate dehydrogenase, putative mitochondrial FAD-dependent glycerol-3-phosphate dehydrogenase. possibly involved in storage lipid catabolism and glycerol assimilation, and in glycerol-3-phosphate shuttle which transports reducing power from cytosol to mitochondrion. similar to unnamed protein product [Vitis vinifera] (GB:CAO68906.1); similar to predicted protein [Physcomitrella pate…	Law et al., 2012
AT3G10690	258966_at	DNA GYRASE A (GYRA); FUNCTIONS IN: DNA topoisomerase activity, catalytic activity, ATP binding; INVOLVED IN: DNA topological change, DNA metabolic process; LOCATED IN: mitochondrion, chloroplast, nucleoid; EXPRESSED IN: 22 plant structures; EXPRESSED DURING: 13 growth stages; CONTAINS InterPro DOMAIN/s: DNA gyrase, subunit A (InterPro:IPR005743), DNA topoisomerase, type IIA, subunit A/C-terminal …	Law et al., 2012
AT3G10860	258772_at	ubiquinone-binding protein	Law et al., 2012
AT3G10920	256439_at	MSD1 (MANGANESE SUPEROXIDE DISMUTASE 1); manganese superoxide dismutase	Law et al., 2012
AT3G10930	256442_at	similar to unknown protein [Arabidopsis thaliana] (TAIR:AT5G05300.1)	Law et al., 2012
AT3G11460	259285_at	pentatricopeptide (PPR) repeat-containing protein	Law et al., 2012
AT3G11670	259070_at	DGD1 (DIGALACTOSYL DIACYLGLYCEROL DEFICIENT 1); galactolipid galactosyltransferase/ transferase, transferring glycosyl groups Responsible for the final assembly of galactolipids in photosynthetic membranes. Provides stability to the PS I core complex (e.g. subunits PsaD, PsaE). Identical to Digalactosyldiacylglycerol synthase 1, chloroplast precursor (DGD1) [Arabidopsis Thaliana] (GB:Q9S7D1;GB:Q3…	Law et al., 2012
AT3G12260	256267_at		Law et al., 2012
AT3G12370	256234_at	50S ribosomal protein L10	Law et al., 2012
AT3G12580	256245_at	HSP70 (heat shock protein 70); ATP binding similar to heat shock cognate 70 kDa protein 3 (HSC70-3) (HSP70-3) [Arabidopsis thaliana] (TAIR:AT3G09440.1); similar to heat shock cognate 70 kDa protein 2 (HSC70-2) (HSP70-2) [Arabidopsis thaliana] (TAIR:AT5G02490.1); similar to HSC70-1 (heat shock cognate 70 kDa protein 1), ATP binding [Arabidopsis thaliana] (TAIR:AT5G02500.1); similar to heat shock p…	Law et al., 2012
AT3G12650	257707_at	similar to unnamed protein product [Vitis vinifera] (GB:CAO15069.1)	Law et al., 2012
AT3G12780	257699_at	PGK1 (PHOSPHOGLYCERATE KINASE 1); phosphoglycerate kinase nuclear phosphoglycerate kinase (PGK1) similar to phosphoglycerate kinase, putative [Arabidopsis thaliana] (TAIR:AT1G56190.2); similar to phosphoglycerate kinase, putative [Arabidopsis thaliana] (TAIR:AT1G56190.1); similar to chloroplast phosphoglycerate kinase [Populus nigra] (GB:BAA33803.1); similar to hypothetical protein [Vitis vinifer…	Law et al., 2012
AT3G12830	257690_at	auxin-responsive family protein	Law et al., 2012
AT3G13110	257194_at	AtSerat2;2 (SERINE ACETYLTRANSFERASE 1); serine O-acetyltransferase Encodes a mitochondrial serine O-acetyltransferase involved in sulfur assimilation and cysteine biosynthesis. Expressed in the vascular system. Identical to Serine acetyltransferase 3, mitochondrial precursor (SAT3) [Arabidopsis Thaliana] (GB:Q39218;GB:Q42532;GB:Q43739;GB:Q43740;GB:Q7DLZ8;GB:Q7DM01); similar to AtSerat2,1 (SERINE…	Law et al., 2012
AT3G13120	257190_at	30S ribosomal protein S10	Law et al., 2012
AT3G13160	257193_at	pentatricopeptide (PPR) repeat-containing protein	Law et al., 2012
AT3G13470	256983_at	chaperonin, putative similar to CPN60B (CHAPERONIN 60 BETA), ATP binding / protein binding / unfolded protein binding [Arabidopsis thaliana] (TAIR:AT1G55490.1); similar to CPN60B (CHAPERONIN 60 BETA), ATP binding / protein binding / unfolded protein binding [Arabidopsis thaliana] (TAIR:AT1G55490.2); similar to ATP binding / protein binding / unfolded protein binding [Arabidopsis thaliana] (TAIR:A…	Law et al., 2012
AT3G13490	256963_at	OVA5 (OVULE ABORTION 5); ATP binding / aminoacyl-tRNA ligase similar to lysyl-tRNA synthetase, putative / lysine--tRNA ligase, putative [Arabidopsis thaliana] (TAIR:AT3G11710.1); similar to unnamed protein product [Vitis vinifera] (GB:CAO22096.1); similar to hypothetical protein [Vitis vinifera] (GB:CAN72569.1); similar to predicted protein [Physcomitrella patens subsp. patens] (GB:EDQ53728.1); c…	Law et al., 2012
AT3G13550	256954_at	FUS9 (FUSCA 9); ubiquitin-protein ligase Encodes a protein similar to ubiquitin-conjugating enzyme (E2) variant proteins (UEV); lacks catalytic cysteine residue found in ubiquitin-conjugating enzyme E2. Represses photomorphogenesis and induces skotomorphogenesis in the dark. Identical to Constitutive photomorphogenesis protein 10 (COP10) [Arabidopsis Thaliana] (GB:Q9LJD7); similar to UBC29 (UBIQU…	Law et al., 2012
AT3G13590	256646_at	DC1 domain-containing protein similar to DC1 domain-containing protein [Arabidopsis thaliana] (TAIR:AT5G42280.1); similar to DC1 domain-containing protein [Brassica oleracea] (GB:ABD65623.1); contains InterPro domain Protein kinase C, phorbol ester/diacylglycerol binding; (InterPro:IPR002219); contains InterPro domain C1-like (InterPro:IPR011424); contains InterPro domain Zinc finger, PHD-type; (…	Law et al., 2012
AT3G13770	256775_at	pentatricopeptide (PPR) repeat-containing protein	Law et al., 2012
AT3G13860	257608_at	chaperonin, putative	Law et al., 2012
AT3G13880	257607_at	pentatricopeptide (PPR) repeat-containing protein	Law et al., 2012
AT3G13930	258208_at	, putative | chr3:4595876-4600469 FORWARD	Law et al., 2012
AT3G14270	258361_at	phosphatidylinositol-4-phosphate 5-kinase family protein Encodes a FYVE domain protein containing the following domains: FYVE + Chaperonin + PIP5K. similar to 1-phosphatidylinositol-4-phosphate 5-kinase/ zinc ion binding [Arabidopsis thaliana] (TAIR:AT4G33240.1); similar to unknown protein [Arabidopsis thaliana] (TAIR:AT4G33240.2); similar to phosphatidylinositol-4-phosphate 5-kinase family prote…	Law et al., 2012
AT3G14400	258372_at	UBP25 (UBIQUITIN-SPECIFIC PROTEASE 25); ubiquitin-specific protease Encodes a ubiquitin-specific protease. Identical to Ubiquitin carboxyl-terminal hydrolase 25 (UBP25) [Arabidopsis Thaliana] (GB:Q9FPS2;GB:Q8VZF5;GB:Q9LUK9); similar to UBP23 (UBIQUITIN-SPECIFIC PROTEASE 23), ubiquitin-specific protease [Arabidopsis thaliana] (TAIR:AT5G57990.1); similar to unnamed protein product [Vitis vinifera] …	Law et al., 2012
AT3G14580	258088_at	pentatricopeptide (PPR) repeat-containing protein	Law et al., 2012
AT3G14930	257219_at	HEME1; uroporphyrinogen decarboxylase	Law et al., 2012
AT3G14940	257217_at	ATPPC3 (PHOSPHOENOLPYRUVATE CARBOXYLASE 3); phosphoenolpyruvate carboxylase	Law et al., 2012
AT3G15000	257218_at	Identical to Uncharacterized mitochondrial protein At3g15000 [Arabidopsis Thaliana] (GB:Q9LKA5); similar to plastid developmental protein DAG, putative [Arabidopsis thaliana] (TAIR:AT3G06790.2); similar to unnamed protein product [Vitis vinifera] (GB:CAO39382.1)	Law et al., 2012
AT3G15020	257213_at	malate dehydrogenase (NAD), mitochondrial, putative | chr3:5056068-5058248 FORWARD	Law et al., 2012
AT3G15140	256858_at	Polynucleotidyl transferase	Law et al., 2012
AT3G15352	257058_at		Law et al., 2012
AT3G15590	257291_at	DNA-binding protein, putative similar to DNA-binding protein, putative	Law et al., 2012
AT3G15640	258274_at	cytochrome c oxidase family protein	Law et al., 2012
AT3G15660	258273_at	glutaredoxin family protein	Law et al., 2012
AT3G16010	258334_at	pentatricopeptide (PPR) repeat-containing protein	Law et al., 2012
AT3G16230	258053_at	RNA binding / catalytic similar to unknown protein [Arabidopsis thaliana] (TAIR:AT3G16220.1); similar to unnamed protein product [Vitis vinifera] (GB:CAO45862.1); contains InterPro domain RNA ligase/cyclic nucleotide phosphodiesterase; (InterPro:IPR009097); contains InterPro domain K Homology; (InterPro:IPR004087); contains InterPro domain K Homology, type 1; (InterPro:IPR004088); contains InterP…	Law et al., 2012
AT3G16480	259326_at	MPPALPHA (mitochondrial processing peptidase alpha subunit); metalloendopeptidase	Law et al., 2012
AT3G16550	257231_at	DEGP12; serine-type peptidase/ trypsin Encodes a putative DegP protease. Identical to Putative protease Do-like 12, mitochondrial precursor (DEGP12) [Arabidopsis Thaliana] (GB:Q9LK70); similar to DEGP11 (DEGP PROTEASE 11), serine-type peptidase/ trypsin [Arabidopsis thaliana] (TAIR:AT3G16540.1); similar to unnamed protein product [Vitis vinifera] (GB:CAO15604.1); contains InterPro domain Peptidas…	Law et al., 2012
AT3G16700	258379_at	fumarylacetoacetate hydrolase family protein similar to fumarylacetoacetate hydrolase family protein [Arabidopsis thaliana] (TAIR:AT4G15940.1); similar to unknown [Populus trichocarpa] (GB:ABK96107.1); contains InterPro domain Fumarylacetoacetase, C-terminal-related; (InterPro:IPR011234); contains InterPro domain Fumarylacetoacetase, C-terminal-like; (InterPro:IPR002529)	Law et al., 2012
AT3G16890	257928_at	pentatricopeptide (PPR) repeat-containing protein similar to EMB2745 (EMBRYO DEFECTIVE 2745	Law et al., 2012
AT3G16950	257895_at	Symbols: LPD1, ptlpd1 | LPD1 (LIPOAMIDE DEHYDROGENASE 1); dihydrolipoyl dehydrogenase | chr3:5786385-5790525 REVERSE	Law et al., 2012
AT3G17170	257891_at	30S ribosomal protein S6	Law et al., 2012
AT3G17240	258439_at	mtLPD2 | ; ATP binding / dihydrolipoyl dehydrogenase | chr3:5889872-5892252 REVERSE	Law et al., 2012
AT3G17465	258404_at	RPL3P (ribosomal protein large subunit 3P); structural constituent of ribosome encodes a putative L3 ribosomal protein targeted to the plastid. Identical to 50S ribosomal protein L3-2, chloroplast precursor (RPL3B) [Arabidopsis Thaliana] (GB:Q9LRN8;GB:Q93WN7); similar to ribosomal protein L3 family protein [Arabidopsis thaliana] (TAIR:AT2G43030.1); similar to unknown [Populus trichocarpa] (GB:ABK…	Law et al., 2012
AT3G17910	258164_at	SURF1 (SURFEIT 1)	Law et al., 2012
AT3G18040	258123_at	MPK9 (MAP KINASE 9); MAP kinase MAP KINASE 9 Identical to Mitogen-activated protein kinase 9 (MPK9) [Arabidopsis Thaliana] (GB:Q9LV37;GB:Q9MB22); similar to ATMPK8 (ARABIDOPSIS THALIANA MAP KINASE 8), MAP kinase [Arabidopsis thaliana] (TAIR:AT1G18150.2); similar to ATMPK8 (ARABIDOPSIS THALIANA MAP KINASE 8), MAP kinase [Arabidopsis thaliana] (TAIR:AT1G18150.1); similar to ATMPK15 (ARABIDOPSIS THA…	Law et al., 2012
AT3G18410	260767_s_at		Law et al., 2012
AT3G18760	257755_at	30S ribosomal protein S6	Law et al., 2012
AT3G18880	256654_at	30S ribosomal protein S17	Law et al., 2012
AT3G18970	256919_at	pentatricopeptide (PPR) repeat-containing protein	Law et al., 2012
AT3G19170	257033_at	ATPREP1/ATZNMP (PRESEQUENCE PROTEASE 1); metalloendopeptidase	Law et al., 2012
AT3G19440	258009_at	pseudouridine synthase family protein similar to pseudouridine synthase family protein [Arabidopsis thaliana] (TAIR:AT1G78910.1); similar to hypothetical protein OsI_029312 [Oryza sativa (indica cultivar-group)] (GB:EAZ08080.1); contains InterPro domain Pseudouridine synthase; (InterPro:IPR006145)	Law et al., 2012
AT3G19480	258025_at	D-3-phosphoglycerate dehydrogenase, putative / 3-PGDH, putative similar to PGDH (3-PHOSPHOGLYCERATE DEHYDROGENASE), phosphoglycerate dehydrogenase [Arabidopsis thaliana] (TAIR:AT1G17745.1); similar to EDA9 (embryo sac development arrest 9), NAD binding / amino acid binding / binding / catalytic/ cofactor binding / oxidoreductase, acting on the CH-OH group of donors, NAD or NADP as acceptor / phos…	Law et al., 2012
AT3G20000	256628_at	TOM40 (translocase of the outer mitochondrial membrane 40); voltage-gated anion channel	Law et al., 2012
AT3G20040	257124_at	ATHXK4; ATP binding / fructokinase/ glucokinase/ hexokinase	Law et al., 2012
AT3G20230	257132_at	50S ribosomal protein L18	Law et al., 2012
AT3G20240	257131_at	Mitochondrial substrate carrier family protein; FUNCTIONS IN: binding, transporter activity; INVOLVED IN: transport, mitochondrial transport, transmembrane transport; LOCATED IN: mitochondrial inner membrane, membrane; EXPRESSED IN: 19 plant structures; EXPRESSED DURING: 12 growth stages; CONTAINS InterPro DOMAIN/s: Mitochondrial carrier protein (InterPro:IPR002067), Mitochondrial substrate carri…	Law et al., 2012
AT3G20620	257084_at	F-box family protein-related similar to hypothetical protein [Vitis vinifera] (GB:CAN80943.1); contains InterPro domain F-box associated type 1 (InterPro:IPR006527)	Law et al., 2012
AT3G20970	256807_AT	Encodes a protein containing the NFU domain that may be involved in iron-sulfur cluster assembly. Part of a five member gene family, more closely related to NFU5 than to NFU1,2, and 3. Targeted to the mitochondrion.	Law et al., 2012
AT3G21390	256819_at	Mitochondrial substrate carrier family protein; FUNCTIONS IN: binding, transporter activity; INVOLVED IN: transport, mitochondrial transport, transmembrane transport; LOCATED IN: mitochondrial inner membrane, membrane; EXPRESSED IN: 22 plant structures; EXPRESSED DURING: 15 growth stages; CONTAINS InterPro DOMAIN/s: Mitochondrial carrier protein (InterPro:IPR002067), Mitochondrial substrate carri…	Law et al., 2012
AT3G21720	257947_at	Symbols: ICL | ICL (ISOCITRATE LYASE); catalytic/ isocitrate lyase | chr3:7652487-7656011 REVERSE	Law et al., 2012
AT3G22200	256765_at	POP2 (POLLEN-PISTIL INCOMPATIBILITY 2); 4-aminobutyrate transaminase Genetically redundant with POP3;mediates pollen tube guidance. Double mutants are self sterile; gamma-aminobutyrate transaminase subunit precursor; nuclear gene for mitochondrial product. Encodes gamma-aminobutyrate transaminase that uses pyruvate instead of alpha-ketoglutarate as cosubstrate. Mutations in POP2/HER1 render roots…	Law et al., 2012
AT3G22300	258454_at	RPS10 (RIBOSOMAL PROTEIN S10); structural constituent of ribosome Nuclear-encoded gene for mitochondrial ribosomal small subunit protein S10 Identical to 40S ribosomal protein S10, mitochondrial precursor (RPS10) [Arabidopsis Thaliana] (GB:P42797;GB:Q9LUW7); similar to PMH1 (PUTATIVE MITOCHONDRIAL RNA HELICASE 1), ATP-dependent helicase [Arabidopsis thaliana] (TAIR:AT3G22310.1); similar to riboso…	Law et al., 2012
AT3G22330	258449_s_at	DEAD-box protein required for efficient group II intron splicing in mitochondria potential function as RNA chaperone required for formation or maintenance of complex RNA secondary structures of introns rather than a direct role in splicing	Law et al., 2012
AT3G22360	258451_at	AOX1B (alternative oxidase 1B); alternative oxidase	Law et al., 2012
AT3G22370	258452_at	AOX1A (alternative oxidase 1A); alternative oxidase	Law et al., 2012
AT3G22450	258447_at	structural constituent of ribosome similar to structural constituent of ribosome [Arabidopsis thaliana] (TAIR:AT1G08845.1); similar to unnamed protein product [Vitis vinifera] (GB:CAO71172.1); contains InterPro domain Ribosomal protein L18/L5; (InterPro:IPR005484)	Law et al., 2012
AT3G22670	258317_at	pentatricopeptide (PPR) repeat-containing protein	Law et al., 2012
AT3G22960	256836_at	PKP-ALPHA; pyruvate kinase	Law et al., 2012
AT3G23700	257172_at	30s ribosomal protain S1	Law et al., 2012
AT3G23830	256890_at	GR-RBP4/GRP4 (GLYCINE-RICH RNA-BINDING PROTEIN 4); RNA binding / double-stranded DNA binding / single-stranded DNA binding	Law et al., 2012
AT3G23990	256905_at	HSP60 (Heat shock protein 60); ATP binding / protein binding / unfolded protein binding	Law et al., 2012
AT3G24000	256906_at	pentatricopeptide (PPR) repeat-containing protein	Law et al., 2012
AT3G24200	257240_at	flavin-dependent hydroxylase (UbiF)	Law et al., 2012
AT3G24320	257164_at	Promotes re-arrangements of mitochondrial genome. Mutations affects mitochondrial gene expression, and impairs mitochondrial function. Dual targeting of the protein to mitochondria and chloroplasts caused by alternative translation initiation.	Law et al., 2012
AT3G24515	258137_at	UBC37 (UBIQUITIN-CONJUGATING ENZYME 37); ubiquitin-protein ligase similar to UBC11 (ubiquitin-conjugating enzyme 11), ubiquitin-protein ligase [Arabidopsis thaliana] (TAIR:AT3G08690.1); similar to unnamed protein product [Vitis vinifera] (GB:CAO65533.1); contains InterPro domain Ubiquitin-conjugating enzyme, E2; (InterPro:IPR000608); contains InterPro domain Ubiquitin-conjugating enzyme/RWD-like …	Law et al., 2012
AT3G25060	257103_at	pentatricopeptide (PPR) repeat-containing protein	Law et al., 2012
AT3G25120	257818_at	mitochondrial import inner membrane translocase subunit Tim17/Tim22/Tim23 family protein	Law et al., 2012
AT3G25140	257816_at	GAUT8/QUA1 (GALACTURONOSYLTRANSFERASE 8, QUASIMODO1); polygalacturonate 4-alpha-galacturonosyltransferase/ transferase, transferring glycosyl groups / transferase, transferring hexosyl groups Quasimodo1, encodes a glycosyltransferase, involved in homogalacturonan biosynthesis; mutant shows cell adhesion defect and lower wall uronic acid content. Identical to Glycosyltransferase QUASIMODO1 (QUA1) …	Law et al., 2012
AT3G25740	257646_at	MAP1B (METHIONINE AMINOPEPTIDASE 1C); metalloexopeptidase Encodes a plastid localized methionine aminopeptidase. Formerly called MAP1C, now called MAP1B. Identical to Methionine aminopeptidase 1C, chloroplast/mitochondrial precursor (MAP1C) [Arabidopsis Thaliana] (GB:Q9FV51;GB:Q9LS05); similar to MAP1C (METHIONINE AMINOPEPTIDASE 1B), metalloexopeptidase [Arabidopsis thaliana] (TAIR:AT1G13270.1); …	Law et al., 2012
AT3G25960	258065_at	pyruvate kinase, putative	Law et al., 2012
AT3G26560	257310_at	ATP-dependent RNA helicase, putative Identical to Probable pre-mRNA-splicing factor ATP-dependent RNA helicase [Arabidopsis Thaliana] (GB:Q38953;GB:Q9LRV0); similar to MEE29 (maternal effect embryo arrest 29), ATP-dependent RNA helicase [Arabidopsis thaliana] (TAIR:AT2G35340.1); similar to RNA helicase, putative [Arabidopsis thaliana] (TAIR:AT4G16680.1); similar to EMB2733/ESP3 (EMBRYO DEFECTIVE …	Law et al., 2012
AT3G27070	257810_at	TOM20-1 (TRANSLOCASE OUTER MEMBRANE 20-1)	Law et al., 2012
AT3G27080	257792_at	TOM20-3 (TRANSLOCASE OF OUTER MEMBRANE 20 KDA SUBUNIT 3); P-P-bond-hydrolysis-driven protein transmembrane transporter	Law et al., 2012
AT3G27240	257148_at	cytochrome c1, putative	Law et al., 2012
AT3G27280	257149_at	Part of protein complexes that are necessary for proficient mitochondrial function or biogenesis, thereby supporting cell division and differentiation in apical tissues	Law et al., 2012
AT3G27380	257713_at	Succinate dehydrogenase subunit 2	Law et al., 2012
AT3G27560	257972_at	ATN1; kinase/ protein serine/threonine/tyrosine kinase encodes a protein with kinase domains, including catalytic domains for serine/threonine as well as tyrosine kinases. a member of multi-gene family and is expressed in all tissues examined. similar to protein kinase, putative [Arabidopsis thaliana] (TAIR:AT5G40540.1); similar to flag-tagged protein kinase domain of putative mitogen-activated p…	Law et al., 2012
AT3G27620	258235_at	AOX1C (alternative oxidase 1C); alternative oxidase	Law et al., 2012
AT3G27930	256851_at	Unknown b-barrel	Law et al., 2012
AT3G28520	256594_at	AAA-type ATPase family protein similar to AAA-type ATPase family protein [Arabidopsis thaliana] (TAIR:AT3G28540.2); similar to AAA-type ATPase family protein [Arabidopsis thaliana] (TAIR:AT3G28540.1); similar to hypothetical protein [Vitis vinifera] (GB:CAN79616.1); contains InterPro domain AAA+ ATPase, core; (InterPro:IPR003593); contains InterPro domain AAA ATPase, core; (InterPro:IPR003959)	Law et al., 2012
AT3G28600	256991_at	ATP binding / ATPase similar to ATP binding / ATPase [Arabidopsis thaliana] (TAIR:AT3G28610.1); similar to AAA-type ATPase family protein [Arabidopsis thaliana] (TAIR:AT5G40000.1); similar to unnamed protein product [Vitis vinifera] (GB:CAO14845.1); contains InterPro domain AAA+ ATPase, core; (InterPro:IPR003593); contains InterPro domain AAA ATPase, core; (InterPro:IPR003959)	Law et al., 2012
AT3G29370	256743_at	similar to unknown protein [Arabidopsis thaliana] (TAIR:AT5G39240.1)	Law et al., 2012
AT3G29800	245225_at	AAA-type ATPase family	Law et al., 2012
AT3G44330	252680_at	similar to hypothetical protein OsJ_024705 [Oryza sativa (japonica cultivar-group)] (GB:EAZ41222.1); similar to Os08g0102100 [Oryza sativa (japonica cultivar-group)] (GB:NP_001060766.1); similar to unnamed protein product [Vitis vinifera] (GB:CAO48702.1); contains InterPro domain Nicastrin; (InterPro:IPR008710); contains InterPro domain Nicalin (InterPro:IPR016574)	Law et al., 2012
AT3G44370	252682_at	binding similar to OXA1 family protein [Arabidopsis thaliana] (TAIR:AT1G65080.1); similar to hypothetical protein OsJ_019466 [Oryza sativa (japonica cultivar-group)] (GB:EAZ35983.1); contains InterPro domain Tetratricopeptide-like helical; (InterPro:IPR011990); contains InterPro domain 60 kDa inner membrane insertion protein; (InterPro:IPR001708); contains InterPro domain Tetratricopeptide region…	Law et al., 2012
AT3G45300	252570_at	IVD (ISOVALERYL-COA-DEHYDROGENASE) Encodes isovaleryl-coenzyme a dehydrogenase. Identical to Isovaleryl-CoA dehydrogenase, mitochondrial precursor (IVD) [Arabidopsis Thaliana] (GB:Q9SWG0;GB:Q8W4G7;GB:Q9XFT2); similar to ACX4 (ACYL-COA OXIDASE 4), oxidoreductase [Arabidopsis thaliana] (TAIR:AT3G51840.1); similar to unnamed protein product [Vitis vinifera] (GB:CAO21816.1); similar to isovaleryl-CoA…	Law et al., 2012
AT3G45770	252542_at	oxidoreductase, zinc-binding dehydrogenase family protein	Law et al., 2012
AT3G46020	252559_at	RNA-binding protein, putative similar to RNA recognition motif (RRM)-containing protein [Arabidopsis thaliana] (TAIR:AT5G59860.1); similar to RNA-binding region RNP-1 (RNA recognition motif) [Medicago truncatula] (GB:ABN06003.1); contains InterPro domain RNA recognition motif, RNP-1; (InterPro:IPR000504); contains InterPro domain Nucleotide-binding, alpha-beta plait; (InterPro:IPR012677)	Law et al., 2012
AT3G46100	252516_at	ATHRS1 (HISTIDYL-TRNA SYNTHETASE 1); histidine-tRNA ligase histidyl-tRNA synthetase similar to ATP binding / aminoacyl-tRNA ligase/ histidine-tRNA ligase/ nucleotide binding [Arabidopsis thaliana] (TAIR:AT5G03406.1); similar to unnamed protein product [Vitis vinifera] (GB:CAO18198.1); contains InterPro domain Aminoacyl-tRNA synthetase, class II (G, H, P and S); (InterPro:IPR002314); contains Inte…	Law et al., 2012
AT3G46430	252524_at	similar to unknown protein [Arabidopsis thaliana] (TAIR:AT5G59613.1); similar to mitochondrial ATP synthase 6 KD subunit [Oryza sativa (japonica cultivar-group)] (GB:BAB21526.1)	Law et al., 2012
AT3G46560	252479_at	TIM9 (EMBRYO DEFECTIVE 2474); P-P-bond-hydrolysis-driven protein transmembrane transporter	Law et al., 2012
AT3G47450	252410_at	ATNOA1/ATNOS1/NOA1/NOS1 (NO ASSOCIATED 1); nitric-oxide synthase Encodes a distinct nitric oxide synthase that regulates growth and hormonal signaling in plants. NOS1 also attenuates oxidative stress and reactive oxygen species (ROS). Located in mitochondrion it also seems to be involved in regulating leaf senescence and cell death. AtNOS1 is involved in nitric oxide biosynthesis in response to A…	Law et al., 2012
AT3G47520	252407_at	Symbols: MDH | MDH (MALATE DEHYDROGENASE); L-malate dehydrogenase/ binding / catalytic/ malate dehydrogenase/ oxidoreductase/ oxidoreductase, acting on the CH-OH group of donors, NAD or NADP as acceptor | chr3:17513274-17515041 FORWARD	Law et al., 2012
AT3G47833	252389_at	Succinate dehydrogenase subunit 7	Law et al., 2012
AT3G47840	252386_at	pentatricopeptide (PPR) repeat-containing protein	Law et al., 2012
AT3G47930	252376_at	ATGLDH (L-GALACTONO-1,4-LACTONE DEHYDOROGENASE); FAD binding / catalytic/ oxidoreductase	Law et al., 2012
AT3G48000	252372_at	ALDH2B4 (ALDEHYDE DEHYDROGENASE 2); 3-chloroallyl aldehyde dehydrogenase/ aldehyde dehydrogenase (NAD) putative (NAD+) aldehyde dehydrogenase (At3g48000) mRNA, Identical to Aldehyde dehydrogenase 2B4, mitochondrial precursor (ALDH2B4) [Arabidopsis Thaliana] (GB:Q9SU63;GB:Q42090); similar to ALDH2B7 (Aldehyde dehydrogenase 2B7), 3-chloroallyl aldehyde dehydrogenase/ aldehyde dehydrogenase (NAD) [A…	Law et al., 2012
AT3G48110	252404_at	EDD1 (EMBRYO-DEFECTIVE-DEVELOPMENT 1) glycine-tRNA ligase Identical to Glycyl-tRNA synthetase 2, chloroplast/mitochondrial precursor (GLYRS-2) [Arabidopsis Thaliana] (GB:Q8L785;GB:O23150;GB:Q9SU73); similar to hypothetical protein OsI_020544 [Oryza sativa (indica cultivar-group)] (GB:EAY99311.1); similar to predicted protein [Physcomitrella patens subsp. patens] (GB:EDQ54079.1); similar to hypoth…	Law et al., 2012
AT3G48250	252355_at	pentatricopeptide (PPR) repeat-containing protein	Law et al., 2012
AT3G48680	252326_at		Law et al., 2012
AT3G48730	252318_at	GSA2 (GLUTAMATE-1-SEMIALDEHYDE-2,1-AMINOMUTASE); glutamate-1-semialdehyde 2,1-aminomutase	Law et al., 2012
AT3G48850	252334_at	phosphate transporter 3;2 (PHT3;2); FUNCTIONS IN: binding; INVOLVED IN: transport, transmembrane transport; LOCATED IN: mitochondrial inner membrane, chloroplast, membrane; EXPRESSED IN: stem, sepal, stamen; EXPRESSED DURING: 4 anthesis; CONTAINS InterPro DOMAIN/s: Mitochondrial substrate carrier (InterPro:IPR001993), Mitochondrial substrate/solute carrier (InterPro:IPR018108); BEST Arabidopsis t…	Law et al., 2012
AT3G49080	252287_at	30S ribosomal protein S9	Law et al., 2012
AT3G49160	252300_at	pyruvate kinase family protein	Law et al., 2012
AT3G49240	252305_at	EMB1796 (EMBRYO DEFECTIVE 1796); binding similar to GRP23 (GLUTAMINE-RICH PROTEIN23)	Law et al., 2012
AT3G50520	252169_at	phosphoglycerate/bisphosphoglycerate mutase family protein	Law et al., 2012
AT3G50930	252131_at	BCS1 AAA-type ATPase family protein	Law et al., 2012
AT3G51790	246309_at	ATG1 (G1p-related protein) putative transmembrane protein G1p (AtG1) mRNA, complete similar to hypothetical protein [Vitis vinifera] (GB:CAN61824.1); contains InterPro domain CcmE/CycJ protein; (InterPro:IPR004329); contains InterPro domain Nucleic acid-binding, OB-fold (InterPro:IPR012340)	Law et al., 2012
AT3G51870	246303_at	Mitochondrial substrate carrier family protein; FUNCTIONS IN: binding, transporter activity; INVOLVED IN: transport, response to nematode; LOCATED IN: mitochondrial inner membrane, chloroplast, chloroplast envelope; EXPRESSED IN: 23 plant structures; EXPRESSED DURING: 15 growth stages; CONTAINS InterPro DOMAIN/s: Mitochondrial carrier protein (InterPro:IPR002067), Mitochondrial substrate carrier …	Law et al., 2012
AT3G52200	256682_at	LTA3 | LTA3; ATP binding / dihydrolipoyllysine-residue acetyltransferase | chr3:19360206-19366387 FORWARD	Law et al., 2012
AT3G52300	256679_at	ATP synthase d subunit	Law et al., 2012
AT3G52570	252051_at	similar to hydrolase, alpha/beta fold family protein [Arabidopsis thaliana] (TAIR:AT4G10030.1); similar to unnamed protein product [Vitis vinifera] (GB:CAO15880.1); contains domain PTHR10992:SF17 (PTHR10992:SF17); contains domain PTHR10992 (PTHR10992); contains domain SSF53474 (SSF53474); contains domain G3DSA:3.40.50.1820 (G3DSA:3.40.50.1820)	Law et al., 2012
AT3G52730	252012_at	8 kDa subunit	Law et al., 2012
AT3G52930	252022_at	fructose-bisphosphate aldolase, putative	Law et al., 2012
AT3G53360	251965_at	pentatricopeptide (PPR) repeat-containing protein	Law et al., 2012
AT3G53910	251913_at	malate dehydrogenase-related | chr3:19959856-19960446 REVERSE	Law et al., 2012
AT3G53940	251915_at	Mitochondrial substrate carrier family protein; FUNCTIONS IN: binding, transporter activity; INVOLVED IN: transport, mitochondrial transport, transmembrane transport; LOCATED IN: mitochondrial inner membrane, membrane; EXPRESSED IN: 8 plant structures; EXPRESSED DURING: 4 anthesis, F mature embryo stage, petal differentiation and expansion stage, E expanded cotyledon stage, D bilateral stage; CON…	Law et al., 2012
AT3G54090	251935_at	pfkB-type carbohydrate kinase family protein	Law et al., 2012
AT3G54110	251902_at	PUMP1 (PLANT UNCOUPLING MITOCHONDRIAL PROTEIN 1); binding / oxidative phosphorylation uncoupler	Law et al., 2012
AT3G54660	251860_at	GR (GLUTATHIONE REDUCTASE); glutathione-disulfide reductase	Law et al., 2012
AT3G54980	251841_at	pentatricopeptide (PPR) repeat-containing protein	Law et al., 2012
AT3G55010	251830_at	ATPURM/PUR5; phosphoribosylformylglycinamidine cyclo-ligase encoding phosphoribosylformylglycinamidine cyclo-ligase (syn. AIR synthetase)that phosphorylates 5-phosphoribosyl-N-formylglycinamidine (FGAM) to form 5-aminoimidazole ribonucleotide (AIR) Identical to Phosphoribosylformylglycinamidine cyclo-ligase, chloroplast precursor (PUR5) [Arabidopsis Thaliana] (GB:Q05728;GB:Q9M2W5;GB:Q9SV49); simi…	Law et al., 2012
AT3G55250	251810_at	similar to unnamed protein product [Vitis vinifera] (GB:CAO14780.1)	Law et al., 2012
AT3G55400	251807_at	OVA1 (OVULE ABORTION 1); ATP binding / aminoacyl-tRNA ligase similar to methionine--tRNA ligase, putative / methionyl-tRNA synthetase, putative / MetRS, putative [Arabidopsis thaliana] (TAIR:AT4G13780.1); similar to predicted protein [Physcomitrella patens subsp. patens] (GB:EDQ70973.1); similar to Putative methionyl-tRNA synthetase [Oryza sativa (japonica cultivar-group)] (GB:AAN77311.1); simila…	Law et al., 2012
AT3G55410	251787_at	2-oxoglutarate dehydrogenase E1 component, putative / oxoglutarate decarboxylase, putative / alpha-ketoglutaric dehydrogenase, putative | chr3:20541435-20546034 FORWARD	Law et al., 2012
AT3G55440	251801_at	ATCTIMC, TPI | TPI (TRIOSEPHOSPHATE ISOMERASE); triose-phosphate isomerase	Law et al., 2012
AT3G55605	251760_at	mitochondrial glycoprotein family protein / MAM33 family protein similar to mitochondrial glycoprotein family protein / MAM33 family protein [Arabidopsis thaliana] (TAIR:AT2G39795.1); similar to unnamed protein product [Vitis vinifera] (GB:CAO69135.1); contains InterPro domain Mitochondrial glycoprotein; (InterPro:IPR003428)	Law et al., 2012
AT3G55630	251759_at	Encodes one of the three folylpolyglutamate synthetase isoforms (FPGSs): FPGS1 (At5g05980, plastidic), FPGS2 (At3g10160, mitochondrial) and FPGS3 (At3g55630, cytosolic).	Law et al., 2012
AT3G55640	251757_at	Mitochondrial substrate carrier family protein; FUNCTIONS IN: binding, transporter activity; INVOLVED IN: transport, mitochondrial transport, transmembrane transport; LOCATED IN: mitochondrial inner membrane, plasma membrane; EXPRESSED IN: 22 plant structures; EXPRESSED DURING: 13 growth stages; CONTAINS InterPro DOMAIN/s: Mitochondrial carrier protein (InterPro:IPR002067), Mitochondrial substrat…	Law et al., 2012
AT3G55650	251777_s_at	,AT3G55810 pyruvate kinase, putative	Law et al., 2012
AT3G56300	251728_at	tRNA synthetase class I (C) family protein similar to tRNA synthetase class I (C) family protein [Arabidopsis thaliana] (TAIR:AT5G38830.1); similar to unnamed protein product [Vitis vinifera] (GB:CAO42791.1); contains InterPro domain Cysteinyl-tRNA synthetase, class Ia, N-terminal; (InterPro:IPR015803); contains InterPro domain Cysteinyl-tRNA synthetase, class Ia; (InterPro:IPR002308); contains I…	Law et al., 2012
AT3G56430	251685_at	similar to unknown protein [Arabidopsis thaliana] (TAIR:AT2G40800.1); similar to unnamed protein product [Vitis vinifera] (GB:CAO41325.1); contains InterPro domain Mitochondrial import inner membrane translocase, subunit Tim21 (InterPro:IPR013261)	Law et al., 2012
AT3G56830	246347_at	similar to unknown protein [Arabidopsis thaliana] (TAIR:AT1G65420.1); similar to unnamed protein product [Vitis vinifera] (GB:CAO24523.1); contains InterPro domain Protein of unknown function DUF565 (InterPro:IPR007572)	Law et al., 2012
AT3G57090	251659_at	BIGYIN; binding similar to binding [Arabidopsis thaliana] (TAIR:AT5G12390.1); similar to unnamed protein product [Vitis vinifera] (GB:CAO63076.1); contains InterPro domain Tetratricopeptide-like helical; (InterPro:IPR011990); contains InterPro domain Tetratricopeptide repeat 11 Fission 1 protein (InterPro:IPR016543)	Law et al., 2012
AT3G57190	251670_at	peptide chain release factor, putative similar to HCF109 (HIGH CHLOROPHYLL FLUORESCENT 109), translation release factor [Arabidopsis thaliana] (TAIR:AT5G36170.2); similar to HCF109 (HIGH CHLOROPHYLL FLUORESCENT 109), translation release factor [Arabidopsis thaliana] (TAIR:AT5G36170.1); similar to hypothetical protein [Vitis vinifera] (GB:CAN74766.1); contains InterPro domain PCRF (InterPro:IPR005…	Law et al., 2012
AT3G57785	251602_at		Law et al., 2012
AT3G58140	251573_at	phenylalanyl-tRNA synthetase class IIc family protein similar to phenylalanyl-tRNA synthetase, putative / phenylalanine--tRNA ligase, putative [Arabidopsis thaliana] (TAIR:AT4G39280.1); similar to Os12g0533700 [Oryza sativa (japonica cultivar-group)] (GB:NP_001066926.1); similar to phenylalanyl-tRNA synthetase class IIc family protein, putative, expressed [Oryza sativa (japonica cultivar-group)] …	Law et al., 2012
AT3G58610	251536_at	ketol-acid reductoisomerase Identical to Ketol-acid reductoisomerase, chloroplast precursor [Arabidopsis Thaliana] (GB:Q05758;GB:Q42559); similar to Ketol-acid reductoisomerase, chloroplast precursor (Acetohydroxy-acid reductoisomerase) (Alpha-keto-beta-hydroxylacil reductoisomerase) (GB:O82043); similar to acetohydroxy acid isomeroreductase [Pisum sativum] (GB:CAB61890.1); similar to hypothetica…	Law et al., 2012
AT3G58740	251540_at	Citrate synthase	Law et al., 2012
AT3G58750	251541_at	Citrate synthase	Law et al., 2012
AT3G58840	251556_at	unknown protein	Law et al., 2012
AT3G59280	251492_at	TXR1 (THAXTOMIN A RESISTANT 1)	Law et al., 2012
AT3G59480	251491_at	pfkB-type carbohydrate kinase family protein	Law et al., 2012
AT3G59650	251483_at	mitochondrial ribosomal protein L51/S25/CI-B8 family protein similar to Unknown protein [Oryza sativa (japonica cultivar-group)] (GB:AAN77300.1); contains InterPro domain Mitochondrial ribosome (InterPro:IPR007741)	Law et al., 2012
AT3G59760	251487_at	OASC (O-ACETYLSERINE (THIOL) LYASE ISOFORM C); cysteine synthase Arabidopsis thaliana O-acetylserine (thiol) lyase (OAS-TL) isoform oasC Identical to Cysteine synthase, mitochondrial precursor (OASC) [Arabidopsis Thaliana] (GB:Q43725;GB:Q8L4A2;GB:Q9M1Z8;GB:Q9M440); similar to OASB (O-ACETYLSERINE (THIOL) LYASE B), cysteine synthase [Arabidopsis thaliana] (TAIR:AT2G43750.1); similar to plastidic c…	Law et al., 2012
AT3G59820	251432_at	calcium-binding mitochondrial protein-related	Law et al., 2012
AT3G59970	267187_s_at	methylenetetrahydrofolate reductase MTHFR1 mRNA, complete	Law et al., 2012
AT3G60050	251451_s_at	pentatricopeptide (PPR) repeat-containing protein	Law et al., 2012
AT3G60100	251455_at	Symbols: CSY5 | CSY5 (citrate synthase 5); citrate (SI)-synthase/ transferase, transferring acyl groups, acyl groups converted into alkyl on transfer | chr3:22192730-22196447 FORWARD	Law et al., 2012
AT3G60190	251429_at	ADL4/ADLP2/DRP1E/EDR3 (DYNAMIN-LIKE PROTEIN 4); GTP binding / GTPase At3g60190 encodes Arabidopsis dynamin-related protein 1E, DRP1E, also known as EDR3, ADL4 and ADL1E, which is 624 amino acid residues long, has a predicted mass of 69.8 kDa and a pI of 7.5. Dynamin-related protein 1E belongs to a plant-specific subclass of dynamin-related proteins (DRP1), consisting of five members in Arabidopsi…	Law et al., 2012
AT3G60980	251346_at	pentatricopeptide (PPR) repeat-containing protein similar to GRP23 (GLUTAMINE-RICH PROTEIN23),	Law et al., 2012
AT3G61360	251313_at	pentatricopeptide (PPR) repeat-containing protein	Law et al., 2012
AT3G61440	251322_at	ATCYSC1 (BETA-SUBSTITUTED ALA SYNTHASE 3;1); L-3-cyanoalanine synthase/ cysteine synthase Encodes a cysteine synthase isomer AtcysC1. The isomer is however less effective in cysteine biosynthesis. It is involved in beta-cyanoalanine biosynthesis, an intermediate of cyanide detoxification pathway. similar to OASC (O-ACETYLSERINE (THIOL) LYASE ISOFORM C), cysteine synthase [Arabidopsis thaliana] (T…	Law et al., 2012
AT3G61530	251320_at	PANB2; 3-methyl-2-oxobutanoate hydroxymethyltransferase similar to KPHMT1/PANB1 (KETOPANTOATE HYDROXYMETHYLTRANSFERASE 1), 3-methyl-2-oxobutanoate hydroxymethyltransferase [Arabidopsis thaliana] (TAIR:AT2G46110.1); similar to unnamed protein product [Vitis vinifera] (GB:CAO39648.1); contains InterPro domain Ketopantoate hydroxymethyltransferase; (InterPro:IPR003700); contains InterPro domain Pyru…	Law et al., 2012
AT3G62400	251220_at	unknown	Law et al., 2012
AT3G62540	251211_s_at	pentatricopeptide (PPR) repeat-containing protein	Law et al., 2012
AT3G62790	251186_at		Law et al., 2012
AT3G62920	251194_at	similar to hypothetical protein [Vitis vinifera] (GB:CAN74119.1)	Law et al., 2012
AT3G63150	251158_at	GTP-binding protein-related	Law et al., 2012
AT3G63490	251120_at	50S ribosomal protein L1	Law et al., 2012
AT4G00530	255680_at	unknown protein	Law et al., 2012
AT4G00570	255683_at	malate oxidoreductase, putative | chr4:242515-246771 REVERSE	Law et al., 2012
AT4G00585	255633_at		Law et al., 2012
AT4G00860	255629_at	ATOZI1 (ARABIDOPSIS THALIANA OZONE-INDUCED PROTEIN 1) putative pathogenesis-related protein whose transcript level is induced in response to ozone and pathogenic Pseudomonas strains. similar to ozone-responsive stress-related protein, putative [Arabidopsis thaliana] (TAIR:AT1G01170.2); similar to ozone-responsive stress-related protein, putative [Arabidopsis thaliana] (TAIR:AT1G01170.1); similar …	Law et al., 2012
AT4G01100	255570_at	adenine nucleotide transporter 1 (ADNT1); FUNCTIONS IN: binding, ADP transmembrane transporter activity, ATP transmembrane transporter activity, AMP transmembrane transporter activity; INVOLVED IN: in 6 processes; LOCATED IN: mitochondrion, mitochondrial inner membrane, plasma membrane, plastid, membrane; EXPRESSED IN: 27 plant structures; EXPRESSED DURING: 15 growth stages; CONTAINS InterPro DOM…	Law et al., 2012
AT4G01400	255573_at	pentatricopeptide (PPR) repeat-containing protein	Law et al., 2012
AT4G01660	255594_at	ABC transporter	Law et al., 2012
AT4G01990	255557_at	pentatricopeptide (PPR) repeat-containing protein	Law et al., 2012
AT4G02580	255442_at		Law et al., 2012
AT4G02750	255446_at	pentatricopeptide (PPR) repeat-containing protein	Law et al., 2012
AT4G02820	255449_at	pentatricopeptide (PPR) repeat-containing protein	Law et al., 2012
AT4G02930	255455_at	elongation factor Tu, putative / EF-Tu, putative Identical to Elongation factor Tu, mitochondrial precursor (TUFA) [Arabidopsis Thaliana] (GB:Q9ZT91;GB:Q39206); similar to AtRABE1b/AtRab8D (Arabidopsis Rab GTPase homolog E1b), translation elongation factor [Arabidopsis thaliana] (TAIR:AT4G20360.1); similar to translational elongation factor EF-TuM [Zea mays] (GB:AAG32661.1); similar to hypothetic…	Law et al., 2012
AT4G03205	255402_at	HEMF2; coproporphyrinogen oxidase	Law et al., 2012
AT4G03240	255420_at	Encodes AtFH, a frataxin homolog. Frataxin is required for the biogenesis of mitochondria in different organisms. AtFH knock-out mutants are lethal. Required for full activity of mitochondrial Fe-S proteins. Deficiency of AtFH induces oxidative stress.	Law et al., 2012
AT4G04040	255365_at	MEE51 (maternal effect embryo arrest 51); diphosphate-fructose-6-phosphate 1-phosphotransferase	Law et al., 2012
AT4G04080	255369_AT	Encodes a mitochondrial protein similar to E.coli IscU. In bacteria, IscU is a scaffold protein accepting sulfur and iron to build a transient Fe-S cluster,which is subsequently transferred to a target apoprotein.	Law et al., 2012
AT4G04190	255318_at	unknown plant specific	Law et al., 2012
AT4G04220	255319_at	disease resistance family protein	Law et al., 2012
AT4G04320	255327_at	Malonyl CoA decarboxylase	Law et al., 2012
AT4G05020	255259_at	NDB2 (NAD(P)H DEHYDROGENASE B2); disulfide oxidoreductase	Law et al., 2012
AT4G05340	255222_at	ATP binding	Law et al., 2012
AT4G05450	255233_AT	mitochondrial ferredoxin 1 (MFDX1); FUNCTIONS IN: electron carrier activity, iron-sulfur cluster binding, 2 iron, 2 sulfur cluster binding; INVOLVED IN: pollen tube development; EXPRESSED IN: 22 plant structures; EXPRESSED DURING: 13 growth stages; CONTAINS InterPro DOMAIN/s: Ferredoxin (InterPro:IPR001041), Adrenodoxin (InterPro:IPR001055), Beta-grasp fold, ferredoxin-type (InterPro:IPR012675), …	Law et al., 2012
AT4G05590	255243_at	similar to unknown protein [Arabidopsis thaliana] (TAIR:AT4G22310.1); similar to unknown [Populus trichocarpa] (GB:ABK93494.1); contains InterPro domain Protein of unknown function UPF0041 (InterPro:IPR005336)	Law et al., 2012
AT4G07670	255216_s_at	protease-associated (PA) domain-containing protein; CONTAINS InterPro DOMAIN/s: Protease-associated PA (InterPro:IPR003137); BEST Arabidopsis thaliana protein match is: Peptidase M28 family protein (TAIR:AT5G19740.1); Has 1547 Blast hits to 1542 proteins in 265 species: Archae - 2; Bacteria - 277; Metazoa - 551; Fungi - 328; Plants - 113; Viruses - 0; Other Eukaryotes - 276 (source: NCBI BLink).	Law et al., 2012
AT4G08390	255142_at	SAPX; L-ascorbate peroxidase	Law et al., 2012
AT4G09520	255033_at	catalytic/ metal ion binding / phosphoglycerate mutase	Law et al., 2012
AT4G10040	255011_at	CYTC-2 (CYTOCHROME C-2); electron carrier	Law et al., 2012
AT4G10260	255806_at	pfkB-type carbohydrate kinase family protein	Law et al., 2012
AT4G10750	254937_at	HpcH/HpaI aldolase family protein similar to ALL1 (ALDOLASE LIKE), carbon-carbon lyase/ catalytic [Arabidopsis thaliana] (TAIR:AT4G24080.1); similar to unnamed protein product [Vitis vinifera] (GB:CAO62931.1); contains InterPro domain HpcH/HpaI aldolase; (InterPro:IPR005000); contains InterPro domain Pyruvate/Phosphoenolpyruvate kinase, catalytic core; (InterPro:IPR015813)	Law et al., 2012
AT4G11010	254958_at	NDPK3 (NUCLEOSIDE DIPHOSPHATE KINASE 3); ATP binding / nucleoside diphosphate kinase	Law et al., 2012
AT4G11120	254932_at	translation elongation factor Ts (EF-Ts), putative similar to EMB2726 (EMBRYO DEFECTIVE 2726), translation elongation factor [Arabidopsis thaliana] (TAIR:AT4G29060.1); similar to ethylene-responsive elongation factor EF-Ts precursor [Lycopersicon esculentum] (GB:AAD46403.1); contains InterPro domain Translation elongation factor EFTs/EF1B; (InterPro:IPR001816); contains InterPro domain UBA-like (…	Law et al., 2012
AT4G11440	254929_at	Mitochondrial substrate carrier family protein; FUNCTIONS IN: binding; INVOLVED IN: transport, mitochondrial transport, transmembrane transport; LOCATED IN: mitochondrial inner membrane, membrane; EXPRESSED IN: shoot apex, embryo, seed; EXPRESSED DURING: E expanded cotyledon stage, D bilateral stage; CONTAINS InterPro DOMAIN/s: Mitochondrial substrate carrier (InterPro:IPR001993), Mitochondrial s…	Law et al., 2012
AT4G11600	254890_at	ATGPX6 (GLUTATHIONE PEROXIDASE 6); glutathione peroxidase	Law et al., 2012
AT4G12340	254814_at	unknown	Law et al., 2012
AT4G12590	254830_at	similar to hypothetical protein [Vitis vinifera] (GB:CAN72892.1); contains InterPro domain Protein of unknown function DUF850, transmembrane eukaryotic (InterPro:IPR008568)	Law et al., 2012
AT4G13430	254742_at	Symbols: IIL1 | IIL1 (ISOPROPYL MALATE ISOMERASE LARGE SUBUNIT 1); 4 iron, 4 sulfur cluster binding / hydro-lyase/ lyase | chr4:7803933-7807871 REVERSE	Law et al., 2012
AT4G13850	254684_at	ATGRP2 (GLYCINE-RICH RNA-BINDING PROTEIN 2); RNA binding / double-stranded DNA binding / single-stranded DNA binding Encodes a glycine-rich RNA-binding protein. Gene expression is induced by cold. Identical to Glycine-rich RNA-binding protein 2, mitochondrial precursor (GRP2) [Arabidopsis Thaliana] (GB:Q9SVM8;GB:Q39105;GB:Q41988); similar to GR-RBP4/GRP4 (GLYCINE-RICH RNA-BINDING PROTEIN 4), RNA …	Law et al., 2012
AT4G14170	245595_at	pentatricopeptide (PPR) repeat-containing protein	Law et al., 2012
AT4G14230	245600_at	CBS domain-containing protein-related similar to unknown protein [Arabidopsis thaliana] (TAIR:AT4G14240.1); similar to unnamed protein product [Vitis vinifera] (GB:CAO71090.1); contains InterPro domain Cystathionine beta-synthase, core (InterPro:IPR000644); contains InterPro domain Protein of unknown function DUF21 (InterPro:IPR002550)	Law et al., 2012
AT4G14695	245571_at	similar to unknown protein [Arabidopsis thaliana] (TAIR:AT4G22310.1); similar to unknown [Populus trichocarpa] (GB:ABK93494.1); contains InterPro domain Protein of unknown function UPF0041 (InterPro:IPR005336)	Law et al., 2012
AT4G14790	245578_at	DExH box RNA helicase	Law et al., 2012
AT4G14850	245582_at	Encodes a pentatricopeptide (PPR) protein that binds single-stranded RNA. The N-terminal portion of the protein can localize to the mitochondria. Mutations in this gene make plants less sensitive to inhibitors of the MEP and MVA pathways of isoprenoid biosynthesis and increase the activity of HMG CoA reductase	Law et al., 2012
AT4G15010	245298_at	Mitochondrial substrate carrier family protein; FUNCTIONS IN: binding; INVOLVED IN: transport, mitochondrial transport, transmembrane transport; LOCATED IN: endomembrane system, mitochondrial inner membrane, membrane; EXPRESSED IN: 19 plant structures; EXPRESSED DURING: 8 growth stages; CONTAINS InterPro DOMAIN/s: Mitochondrial substrate carrier (InterPro:IPR001993), Mitochondrial substrate/solut…	Law et al., 2012
AT4G15030	245588_at	CONTAINS InterPro DOMAIN/s: Folate-sensitive fragile site protein Fra10Ac1 (InterPro:IPR019129)	Law et al., 2012
AT4G15530	245528_at	Symbols: PPDK | PPDK (pyruvate orthophosphate dikinase); kinase/ pyruvate, phosphate dikinase | chr4:8864828-8870801 REVERSE	Law et al., 2012
AT4G15640	245502_at	similar to unknown protein [Arabidopsis thaliana] (TAIR:AT3G21465.1); similar to unnamed protein product [Vitis vinifera] (GB:CAO71016.1)	Law et al., 2012
AT4G15940	245332_at	fumarylacetoacetate hydrolase family protein similar to fumarylacetoacetate hydrolase family protein [Arabidopsis thaliana] (TAIR:AT3G16700.1); similar to unknown [Populus trichocarpa] (GB:ABK96107.1); contains InterPro domain Fumarylacetoacetase, C-terminal-related; (InterPro:IPR011234); contains InterPro domain Fumarylacetoacetase, C-terminal-like; (InterPro:IPR002529)	Law et al., 2012
AT4G16450	245394_at		Law et al., 2012
AT4G16800	245446_at	ATP-dependent caseinolytic (Clp) protease/crotonase family protein; FUNCTIONS IN: enoyl-CoA hydratase activity, catalytic activity; INVOLVED IN: fatty acid metabolic process, metabolic process; LOCATED IN: mitochondrion; EXPRESSED IN: 23 plant structures; EXPRESSED DURING: 13 growth stages; CONTAINS InterPro DOMAIN/s: Enoyl-CoA hydratase/isomerase, conserved site (InterPro:IPR018376), Crotonase, …	Law et al., 2012
AT4G17300	245413_at	NS1 (OVULE ABORTION 8) Asparaginyl-tRNA synthetase protein involved in amino acid activation/protein synthesis. Identical to Asparaginyl-tRNA synthetase, chloroplast/mitochondrial precursor (SYNO) [Arabidopsis Thaliana] (GB:O48593;GB:O23573); similar to SYNC3, ATP binding / aminoacyl-tRNA ligase/ asparagine-tRNA ligase/ aspartate-tRNA ligase/ nucleic acid binding / nucleotide binding [Arabidopsis…	Law et al., 2012
AT4G17360	245417_at	encodes one of the two putative formyltetrahydrofolate deformylase. Located in the mitochondrion. Involved in photorespiratory tetrahydrofolate cycle.	Law et al., 2012
AT4G17560	245357_at	50S ribosomal protein L19	Law et al., 2012
AT4G17740	245263_at	C-terminal processing protease, putative similar to peptidase S41 family protein [Arabidopsis thaliana] (TAIR:AT3G57680.1); similar to hypothetical protein [Vitis vinifera] (GB:CAN62705.1); similar to unnamed protein product [Vitis vinifera] (GB:CAO71509.1); similar to C-terminal processing protease, putative [Brassica oleracea] (GB:ABD65160.1); contains InterPro domain PDZ/DHR/GLGF; (InterPro:IP…	Law et al., 2012
AT4G18460	254676_at	D-Tyr-tRNA(Tyr) deacylase family protein similar to unnamed protein product [Vitis vinifera] (GB:CAO66365.1); contains InterPro domain D-tyrosyl-tRNA(Tyr) deacylase; (InterPro:IPR003732)	Law et al., 2012
AT4G19220	254556_at	pentatricopeptide (PPR) repeat-containing protein	Law et al., 2012
AT4G20090	254498_at	EMB1025 (EMBRYO DEFECTIVE 1025) similar to pentatricopeptide (PPR) repeat-containing protein	Law et al., 2012
AT4G20150	254462_at		Law et al., 2012
AT4G20830	254432_at	FAD-binding domain-containing protein Identical to Reticuline oxidase-like protein precursor [Arabidopsis Thaliana] (GB:Q9SVG4;GB:Q3E9Y2;GB:Q8H7B5); similar to FAD-binding domain-containing protein [Arabidopsis thaliana] (TAIR:AT4G20840.1); similar to electron carrier [Arabidopsis thaliana] (TAIR:AT1G11770.1); similar to unnamed protein product [Vitis vinifera] (GB:CAO42591.1); contains InterPro …	Law et al., 2012
AT4G21090	254451_AT	MITOCHONDRIAL FERREDOXIN 2 (MFDX2); FUNCTIONS IN: electron carrier activity, iron-sulfur cluster binding, 2 iron, 2 sulfur cluster binding; LOCATED IN: mitochondrion; EXPRESSED IN: 22 plant structures; EXPRESSED DURING: 13 growth stages; CONTAINS InterPro DOMAIN/s: Ferredoxin (InterPro:IPR001041), Adrenodoxin (InterPro:IPR001055), Beta-grasp fold, ferredoxin-type (InterPro:IPR012675), Adrenodoxin…	Law et al., 2012
AT4G21150	254456_at	ribophorin II (RPN2) family protein similar to unnamed protein product [Vitis vinifera] (GB:CAO40612.1); similar to hypothetical protein [Vitis vinifera] (GB:CAN64864.1); similar to Os01g0911200 [Oryza sativa (japonica cultivar-group)] (GB:NP_001045159.1); contains InterPro domain Ribophorin II; (InterPro:IPR008814)	Law et al., 2012
AT4G21170	254457_at	pentatricopeptide (PPR) repeat-containing protein	Law et al., 2012
AT4G21190	254427_at	EMB1417 (EMBRYO DEFECTIVE 1417) similar to pentatricopeptide (PPR) repeat-containing protein	Law et al., 2012
AT4G21300	254401_at	pentatricopeptide (PPR) repeat-containing protein	Law et al., 2012
AT4G21490	254419_at	NDB3; NADH dehydrogenase	Law et al., 2012
AT4G22220	254357_AT	Encodes a mitochondrial protein similar to E.coli IscU. In bacteria, IscU is a scaffold protein accepting sulfur and iron to build a transient Fe-S cluster,which is subsequently transferred to a target apoprotein.	Law et al., 2012
AT4G22310	254358_at	similar to unknown protein [Arabidopsis thaliana] (TAIR:AT4G14695.1); similar to unknown [Populus trichocarpa] (GB:ABK93494.1); contains InterPro domain Protein of unknown function UPF0041 (InterPro:IPR005336)	Law et al., 2012
AT4G23660	254230_at	UbiA prenyltransfer-ase	Law et al., 2012
AT4G23885	254190_at	similar to unknown protein [Arabidopsis thaliana] (TAIR:AT5G24165.1); similar to unnamed protein product [Vitis vinifera] (GB:CAO69543.1)	Law et al., 2012
AT4G23900	254191_at	nucleoside diphosphate kinase 4 (NDK4) Identical to Nucleoside diphosphate kinase IV, chloroplast/mitochondrial precursor (NDK4) [Arabidopsis Thaliana] (GB:Q8LAH8;GB:Q9T0A5); similar to NDPK3 (NUCLEOSIDE DIPHOSPHATE KINASE 3), ATP binding / nucleoside diphosphate kinase [Arabidopsis thaliana] (TAIR:AT4G11010.1); similar to putative nucleoside diphosphate kinase III [Thlaspi caerulescens] (GB:AAY1…	Law et al., 2012
AT4G24190	254166_at	SHD (SHEPHERD); ATP binding encodes an ortholog of GRP94, an ER-resident HSP90-like protein and is involved in regulation of meristem size and organization. Single and double mutant analyses suggest that SHD may be required for the correct folding and/or complex formation of CLV proteins. Lines carrying recessive mutations in this locus exhibits expanded shoot meristems, disorganized root meriste…	Law et al., 2012
AT4G24280	254148_at	CPHSC70-1 (chloroplast heat shock protein 70-1); ATP binding / unfolded protein binding similar to MTHSC70-1 (mitochondrial heat shock protein 70-1), ATP binding / unfolded protein binding [Arabidopsis thaliana] (TAIR:AT4G37910.1); similar to mtHSC70-2 (HEAT SHOCK PROTEIN 70), ATP binding / unfolded protein binding [Arabidopsis thaliana] (TAIR:AT5G09590.1); similar to cpHSC70-2 (HEAT SHOCK PROTEI…	Law et al., 2012
AT4G24380	254158_at	INVOLVED IN: 10-formyltetrahydrofolate biosynthetic process, folic acid and derivative biosynthetic process; EXPRESSED IN: 24 plant structures; EXPRESSED DURING: 15 growth stages; CONTAINS InterPro DOMAIN/s: Serine hydrolase (InterPro:IPR005645); BEST Arabidopsis thaliana protein match is: alpha/beta-Hydrolases superfamily protein (TAIR:AT5G65400.1); Has 30201 Blast hits to 17322 proteins in 780 …	Law et al., 2012
AT4G24570	254120_at	Encodes one of the mitochondrial dicarboxylate carriers (DIC): DIC1 (AT2G22500), DIC2 (AT4G24570), DIC3 (AT5G09470).	Law et al., 2012
AT4G24620	254141_at	PGI1 (PHOSPHOGLUCOSE ISOMERASE 1); glucose-6-phosphate isomerase	Law et al., 2012
AT4G25100	254098_at	FSD1 (FE SUPEROXIDE DISMUTASE 1); iron superoxide dismutase Fe-superoxide dismutase Identical to Superoxide dismutase [Fe], chloroplast precursor (SODB) [Arabidopsis Thaliana] (GB:P21276;GB:Q9FE21;GB:Q9SW16); similar to FSD2 (FE SUPEROXIDE DISMUTASE 2), iron superoxide dismutase [Arabidopsis thaliana] (TAIR:AT5G51100.1); similar to superoxide dismutase [Raphanus sativus] (GB:AAC15842.1); contains…	Law et al., 2012
AT4G25200	254059_at	ATHSP23.6-MITO (MITOCHONDRION-LOCALIZED SMALL HEAT SHOCK PROTEIN 23.6) AtHSP23.6-mito mRNA, nuclear gene encoding mitochondrial Identical to Heat shock 22 kDa protein, mitochondrial precursor (HSP23.6) [Arabidopsis Thaliana] (GB:Q96331); similar to 23.5 kDa mitochondrial small heat shock protein (HSP23.5-M) [Arabidopsis thaliana] (TAIR:AT5G51440.1); similar to hypothetical protein [Vitis vinifera…	Law et al., 2012
AT4G26180	254018_at	Mitochondrial substrate carrier family protein; FUNCTIONS IN: binding, transporter activity; INVOLVED IN: transport, mitochondrial transport, transmembrane transport; LOCATED IN: mitochondrial inner membrane, membrane; EXPRESSED IN: 9 plant structures; EXPRESSED DURING: M germinated pollen stage, 4 anthesis, petal differentiation and expansion stage, E expanded cotyledon stage, D bilateral stage;…	Law et al., 2012
AT4G26210	253986_at	mitochondrial ATP synthase g subunit family protein	Law et al., 2012
AT4G26270	253987_at	PFK3 (PHOSPHOFRUCTOKINASE 3); 6-phosphofructokinase	Law et al., 2012
AT4G26310	253988_at	elongation factor P (EF-P) family protein similar to elongation factor P (EF-P) family protein [Arabidopsis thaliana] (TAIR:AT3G08740.1); similar to putative translation elongation factor P [Oryza sativa (japonica cultivar-group)] (GB:AAP21425.1); contains InterPro domain Translation elongation factor P/YeiP, central; (InterPro:IPR001059); contains InterPro domain Translation protein SH3-like (In…	Law et al., 2012
AT4G26390	254009_at	pyruvate kinase, putative	Law et al., 2012
AT4G26500	253972_AT	Sulfur acceptor that interacts with and activates the cysteine desulfurases, AtSufS in plastids and AtNifS1 in mitochondria, and both activations are vital during embryogenesis. Dual localization in mitochondria and chloroplasts. Involved in Fe-S cluster biogenesis in mitochondria and plastids. Expressed in all major tissues, with higher expression in green parts. Its expression is light-dependen…	Law et al., 2012
AT4G26520	253966_at	fructose-bisphosphate aldolase, cytoplasmic	Law et al., 2012
AT4G26670	253981_at	mitochondrial import inner membrane translocase subunit Tim17/Tim22/Tim23 family protein	Law et al., 2012
AT4G26680	253979_at	pentatricopeptide (PPR) repeat-containing protein similar to UDP-glucoronosyl/UDP-glucosyl transferase family protein	Law et al., 2012
AT4G26780	253949_at	AR192; adenyl-nucleotide exchange factor/ chaperone binding / protein binding / protein homodimerization	Law et al., 2012
AT4G26910	253950_at	2-oxoacid dehydrogenase family protein	Law et al., 2012
AT4G26970	253954_at	aconitate hydratase/ copper ion binding | chr4:13542918-13548629 FORWARD	Law et al., 2012
AT4G27350	253919_at	similar to unknown protein [Arabidopsis thaliana] (TAIR:AT5G54240.1); similar to unnamed protein product [Vitis vinifera] (GB:CAO39196.1); contains InterPro domain Protein of unknown function DUF1223 (InterPro:IPR010634)	Law et al., 2012
AT4G27880	253838_at	seven in absentia (SINA) family protein Identical to E3 ubiquitin-protein ligase SINAT4 (SINAT4) [Arabidopsis Thaliana] (GB:Q9STN8); similar to seven in absentia (SINA) family protein [Arabidopsis thaliana] (TAIR:AT3G61790.1); similar to unknown [Populus trichocarpa] (GB:ABK94975.1); contains InterPro domain Seven in absentia protein; (InterPro:IPR004162); contains InterPro domain SIAH-type (Inte…	Law et al., 2012
AT4G27940	253824_at	manganese tracking factor for mitochondrial SOD2 (MTM1); FUNCTIONS IN: binding; INVOLVED IN: transport, mitochondrial transport, transmembrane transport; LOCATED IN: mitochondrial inner membrane, membrane; EXPRESSED IN: 19 plant structures; EXPRESSED DURING: 9 growth stages; CONTAINS InterPro DOMAIN/s: Mitochondrial substrate carrier (InterPro:IPR001993), Mitochondrial substrate/solute carrier (I…	Law et al., 2012
AT4G28220	253810_at	NDB1 (NAD(P)H DEHYDROGENASE B1); NADH dehydrogenase/ disulfide oxidoreductase	Law et al., 2012
AT4G28390	253776_at	AAC3 (ADP/ATP CARRIER 3); ATP:ADP antiporter/ binding	Law et al., 2012
AT4G28510	263375_s_at	prohibitin 1 (Atphb1)	Law et al., 2012
AT4G29130	253705_at	HXK1 (HEXOKINASE 1); ATP binding / fructokinase/ glucokinase/ hexokinase	Law et al., 2012
AT4G29220	253709_at	PFK1 (PHOSPHOFRUCTOKINASE 1); 6-phosphofructokinase	Law et al., 2012
AT4G29480	253730_at	mitochondrial ATP synthase g subunit family protein	Law et al., 2012
AT4G29540	253674_at	bacterial transferase hexapeptide repeat-containing protein	Law et al., 2012
AT4G30000	253669_at	Dihydropterin pyrophosphokinase / Dihydropteroate synthase; FUNCTIONS IN: 2-amino-4-hydroxy-6-hydroxymethyldihydropteridine diphosphokinase activity, dihydropteroate synthase activity; INVOLVED IN: pteridine and derivative metabolic process, cellular metabolic process, folic acid and derivative biosynthetic process; EXPRESSED IN: 21 plant structures; EXPRESSED DURING: 13 growth stages; CONTAINS I…	Law et al., 2012
AT4G30010	253670_at	ATP synthase f subunit	Law et al., 2012
AT4G30490	253630_at	AFG1-like ATPase family protein similar to AFG1-like ATPase family protein [Arabidopsis thaliana] (TAIR:AT4G28070.2); similar to AFG1-like ATPase family protein [Arabidopsis thaliana] (TAIR:AT4G28070.1); similar to unknown [Populus trichocarpa] (GB:ABK95418.1); similar to hypothetical protein [Vitis vinifera] (GB:CAN65875.1); similar to unnamed protein product [Vitis vinifera] (GB:CAO66595.1); co…	Law et al., 2012
AT4G30500	253636_at	similar to unknown protein [Arabidopsis thaliana] (TAIR:AT2G23940.1); similar to unnamed protein product [Vitis vinifera] (GB:CAO22157.1); contains InterPro domain Protein of unknown function DUF788 (InterPro:IPR008506)	Law et al., 2012
AT4G30700	253584_at	pentatricopeptide (PPR) repeat-containing protein	Law et al., 2012
AT4G30930	253549_at	NFD1 (NUCLEAR FUSION DEFECTIVE 1); structural constituent of ribosome Identical to 50S ribosomal protein L21, mitochondrial precursor (RPL21M) [Arabidopsis Thaliana] (GB:Q8L9A0;GB:O65556;GB:Q9B7N7); similar to 50S ribosomal protein L21, chloroplast / CL21 (RPL21) [Arabidopsis thaliana] (TAIR:AT1G35680.1); similar to unnamed protein product [Vitis vinifera] (GB:CAO46958.1); contains InterPro domai…	Law et al., 2012
AT4G31210	253566_at	DNA topoisomerase family protein	Law et al., 2012
AT4G31810	253492_at	ATP-dependent caseinolytic (Clp) protease/crotonase family protein; FUNCTIONS IN: 3-hydroxyisobutyryl-CoA hydrolase activity, catalytic activity; INVOLVED IN: fatty acid beta-oxidation, metabolic process; LOCATED IN: mitochondrion; EXPRESSED IN: 22 plant structures; EXPRESSED DURING: 12 growth stages; CONTAINS InterPro DOMAIN/s: Crotonase, core (InterPro:IPR001753); BEST Arabidopsis thaliana prot…	Law et al., 2012
AT4G32360	253479_at	NADP adrenodoxin-like ferredoxin reductase similar to GLT1 (NADH-dependent glutamate synthase 1 gene) [Arabidopsis thaliana] (TAIR:AT5G53460.1); similar to unnamed protein product [Vitis vinifera] (GB:CAO65491.1); contains InterPro domain Pyridine nucleotide-disulphide oxidoreductase, class I; (InterPro:IPR001100); contains InterPro domain FAD-dependent pyridine nucleotide-disulphide oxidoreducta…	Law et al., 2012
AT4G32400	253435_at	Encodes a dual targeted mitochondrial and plastidial nucleotide uniport carrier protein required to export newly synthesized adenylates into the cytosol.á	Law et al., 2012
AT4G32430	253430_at	pentatricopeptide (PPR) repeat-containing protein	Law et al., 2012
AT4G32450	253432_at	pentatricopeptide (PPR) repeat-containing protein	Law et al., 2012
AT4G32470	253436_at	14 kDa subunit	Law et al., 2012
AT4G32520	253438_at	SHM3 (SERINE HYDROXYMETHYLTRANSFERASE 3); catalytic/ glycine hydroxymethyltransferase/ pyridoxal phosphate binding	Law et al., 2012
AT4G32840	253404_at	PFK6 (PHOSPHOFRUCTOKINASE 6); 6-phosphofructokinase	Law et al., 2012
AT4G32915	253384_at	glutamyl-tRNA(Gln) amidotransferase similar to unnamed protein product [Vitis vinifera] (GB:CAO43760.1); contains InterPro domain Glu-tRNAGln amidotransferase, C subunit; (InterPro:IPR003837)	Law et al., 2012
AT4G33010	253387_at	AtGLDP1 (Arabidopsis thaliana glycine decarboxylase P-protein 1); catalytic/ glycine dehydrogenase (decarboxylating)/ pyridoxal phosphate binding	Law et al., 2012
AT4G33100	253361_at	Identical to Uncharacterized protein At4g33100 [Arabidopsis Thaliana] (GB:Q9SMZ9;GB:Q680I9); similar to hypothetical protein OsI_030027 [Oryza sativa (indica cultivar-group)] (GB:EAZ08795.1); similar to Os09g0361700 [Oryza sativa (japonica cultivar-group)] (GB:NP_001062985.1); similar to hypothetical protein OsJ_027938 [Oryza sativa (japonica cultivar-group)] (GB:EAZ44455.1); contains InterPro do…	Law et al., 2012
AT4G33140	253374_at	similar to unnamed protein product [Vitis vinifera] (GB:CAO65164.1); contains domain SSF56784 (SSF56784); contains domain PD105831 (PD105831)	Law et al., 2012
AT4G33650	253306_at	ADL2 (ARABIDOPSIS DYNAMIN-LIKE 2); GTP binding / GTPase Encodes a protein with high sequence similarity to the dynamin superfamily. Among those members ADL2 was most closely related to Dnm1p of yeast and likely a member of the Vps1p subfamily. Widely expressed in various tissues with highest expression in flower tissues. Chloroplast localized. Identical to Dynamin-related protein 3A (DRP3A) [Arab…	Law et al., 2012
AT4G33760	253295_at	tRNA synthetase class II (D, K and N) family protein similar to OVA5 (OVULE ABORTION 5), ATP binding / aminoacyl-tRNA ligase [Arabidopsis thaliana] (TAIR:AT3G13490.1); similar to hypothetical protein OsJ_000409 [Oryza sativa (japonica cultivar-group)] (GB:EAZ10584.1); similar to predicted protein [Physcomitrella patens subsp. patens] (GB:EDQ81588.1); similar to unnamed protein product [Vitis vini…	Law et al., 2012
AT4G33990	253319_at	EMB2758 (EMBRYO DEFECTIVE 2758) similar to pentatricopeptide (PPR) repeat-containing protein	Law et al., 2012
AT4G34030	253279_at	MCCB (3-METHYLCROTONYL-COA CARBOXYLASE); biotin carboxylase MCC-B is involved in leucine degradation in mitochondria. The active protein is a dimer of MCC-A and MCC-B. MCC-A is biotinylated whereas MCC-B is not. Identical to Methylcrotonoyl-CoA carboxylase beta chain, mitochondrial precursor (MCCB) [Arabidopsis Thaliana] (GB:Q9LDD8;GB:O49501;GB:Q94F35); similar to putative methylcrotonyl-CoA carb…	Law et al., 2012
AT4G34200	253274_at	EDA9 (embryo sac development arrest 9); NAD binding / amino acid binding / binding / catalytic/ cofactor binding / oxidoreductase, acting on the CH-OH group of donors, NAD or NADP as acceptor / phosphoglycerate dehydrogenase similar to PGDH (3-PHOSPHOGLYCERATE DEHYDROGENASE), phosphoglycerate dehydrogenase [Arabidopsis thaliana] (TAIR:AT1G17745.1); similar to D-3-phosphoglycerate dehydrogenase, p…	Law et al., 2012
AT4G34570	263601_s_at	Encodes a bifunctional dihydrofolate reductase - thymidylate synthase gene. This is unique in Arabidopsis and protozoa. Other organisms have independent genes for this function.	Law et al., 2012
AT4G34620	253201_at	30S ribosomal protein S16	Law et al., 2012
AT4G34700	253230_at		Law et al., 2012
AT4G35000	253223_at	APX3 (ASCORBATE PEROXIDASE 3); L-ascorbate peroxidase	Law et al., 2012
AT4G35260	253196_at	Symbols: IDH1 | IDH1 (ISOCITRATE DEHYDROGENASE 1); isocitrate dehydrogenase (NAD+)/ oxidoreductase, acting on the CH-OH group of donors, NAD or NADP as acceptor | chr4:16774195-16776325 REVERSE	Law et al., 2012
AT4G35490	253138_at	50S ribosomal protein L11	Law et al., 2012
AT4G35650	253149_at	isocitrate dehydrogenase, putative / NAD+ isocitrate dehydrogenase, putative	Law et al., 2012
AT4G35730	253156_at	similar to unknown protein [Arabidopsis thaliana] (TAIR:AT1G34220.2); similar to unnamed protein product [Vitis vinifera] (GB:CAO23719.1); contains InterPro domain Protein of unknown function DUF292, eukaryotic (InterPro:IPR005061)	Law et al., 2012
AT4G35830	253135_at	aconitate hydratase, cytoplasmic / citrate hydro-lyase / aconitase (ACO) | chr4:16972598-16978057 REVERSE	Law et al., 2012
AT4G35850	253116_at	pentatricopeptide (PPR) repeat-containing protein	Law et al., 2012
AT4G35970	253112_at	APX5; L-ascorbate peroxidase/ peroxidase	Law et al., 2012
AT4G36400	246162_at	FAD linked oxidase family protein similar to FAD linked oxidase family protein [Arabidopsis thaliana] (TAIR:AT5G06580.1); similar to putative actin interacting protein [Oryza sativa (japonica cultivar-group)] (GB:BAC79943.1); similar to hypothetical protein OsJ_022439 [Oryza sativa (japonica cultivar-group)] (GB:EAZ38956.1); similar to unnamed protein product [Vitis vinifera] (GB:CAO48288.1); con…	Law et al., 2012
AT4G36580	246282_at	AAA-type ATPase family protein similar to AAA-type ATPase family protein [Arabidopsis thaliana] (TAIR:AT5G16930.1); similar to AAA-type ATPase family protein [Arabidopsis thaliana] (TAIR:AT2G18330.1); similar to ATPase [Arabidopsis thaliana] (TAIR:AT3G03060.1); similar to Os02g0706500 [Oryza sativa (japonica cultivar-group)] (GB:NP_001047871.1); similar to unnamed protein product [Vitis vinifera]…	Law et al., 2012
AT4G36680	246249_at	pentatricopeptide (PPR) repeat-containing protein	Law et al., 2012
AT4G37480	253094_at	DNAJ heat shock N-terminal domain-containing protein similar to DNAJ heat shock family protein [Arabidopsis thaliana] (TAIR:AT3G17830.1); similar to unnamed protein product [Vitis vinifera] (GB:CAO71974.1); contains InterPro domain Heat shock protein DnaJ, N-terminal; (InterPro:IPR001623); contains InterPro domain Molecular chaperone, heat shock protein, Hsp40, DnaJ (InterPro:IPR015609)	Law et al., 2012
AT4G37660	253058_at	50S ribosomal protein L12	Law et al., 2012
AT4G37830	253072_at	Cytochrome c oxidase subunit 6a	Law et al., 2012
AT4G37840	253069_at	HKL3 (HEXOKINASE-LIKE 3); ATP binding / fructokinase/ glucokinase/ hexokinase	Law et al., 2012
AT4G37870	253041_at	Symbols: PCK1, PEPCK | PCK1 (PHOSPHOENOLPYRUVATE CARBOXYKINASE 1); ATP binding / phosphoenolpyruvate carboxykinase (ATP)/ phosphoenolpyruvate carboxykinase/ purine nucleotide binding | chr4:17802694-17806539 REVERSE	Law et al., 2012
AT4G37910	253013_at	MTHSC70-1 (mitochondrial heat shock protein 70-1); ATP binding / unfolded protein binding similar to mtHSC70-2 (HEAT SHOCK PROTEIN 70), ATP binding / unfolded protein binding [Arabidopsis thaliana] (TAIR:AT5G09590.1); similar to CPHSC70-1 (chloroplast heat shock protein 70-1), ATP binding / unfolded protein binding [Arabidopsis thaliana] (TAIR:AT4G24280.1); similar to cpHSC70-2 (HEAT SHOCK PROTEI…	Law et al., 2012
AT4G37930	253009_at	Encodes a protein with mitochondrial serine hydroxymethyltransferase activity, which functions in the photorespiratory pathway, catalyzes the conversion of serine and tetrahydrofolate to glycine and 5,10-methylene tetrahydrofolate. Involved in controlling cell damage caused by abiotic stress, such as high light and salt and the hypersensitive defense response of plants.	Law et al., 2012
AT4G38020	253020_at	tRNA/rRNA methyltransferase (SpoU) family protein similar to unnamed protein product [Vitis vinifera] (GB:CAO23060.1); contains InterPro domain tRNA/rRNA methyltransferase, SpoU; (InterPro:IPR001537)	Law et al., 2012
AT4G38870	252966_at	F-box family protein Identical to Putative F-box protein At4g38870 [Arabidopsis Thaliana] (GB:Q9T0J4); similar to F-box family protein [Arabidopsis thaliana] (TAIR:AT2G21930.1); similar to hypothetical protein [Vitis vinifera] (GB:CAN60954.1); contains InterPro domain F-box associated type 3 (InterPro:IPR013187); contains InterPro domain Cyclin-like F-box (InterPro:IPR001810); contains InterPro d…	Law et al., 2012
AT4G39460	252878_at	SAMC1/SAMT1 (S-ADENOSYLMETHIONINE CARRIER 1); S-adenosylmethionine transmembrane transporter/ binding	Law et al., 2012
AT4G39530	252899_at	pentatricopeptide (PPR) repeat-containing protein	Law et al., 2012
AT4G39660	252855_at	Alanine/Glyoxylate aminotransferase	Law et al., 2012
AT4G39690	252856_at	similar to unknown [Populus trichocarpa] (GB:ABK94999.1); contains domain PTHR15415 (PTHR15415)	Law et al., 2012
AT4G39740	252864_at	electron transport SCO1/SenC family protein	Law et al., 2012
AT4G39880	252850_at	50S ribosomal protein L23	Law et al., 2012
AT5G01340	251090_at	Mitochondrial substrate carrier family protein; FUNCTIONS IN: transporter activity, binding; INVOLVED IN: transport, mitochondrial transport, transmembrane transport; LOCATED IN: mitochondrial inner membrane, membrane; EXPRESSED IN: 23 plant structures; EXPRESSED DURING: 15 growth stages; CONTAINS InterPro DOMAIN/s: Mitochondrial substrate carrier (InterPro:IPR001993), Mitochondrial substrate/sol…	Law et al., 2012
AT5G01500	251106_at	mitochondrial substrate carrier family protein	Law et al., 2012
AT5G03030	250934_at	DNAJ heat shock N-terminal domain-containing protein	Law et al., 2012
AT5G03290	250929_at	isocitrate dehydrogenase, putative / NAD+ isocitrate dehydrogenase, putative	Law et al., 2012
AT5G03455	250923_at	yeast cell cycle CDC25 homolog	Law et al., 2012
AT5G03690	250917_at	fructose-bisphosphate aldolase, putative	Law et al., 2012
AT5G03770	250913_at	3-deoxy-D-manno-octulosonic acid transferase-related similar to unnamed protein product [Vitis vinifera] (GB:CAO15996.1); contains InterPro domain Three-deoxy-D-manno-octulosonic-acid transferase, N-terminal; (InterPro:IPR007507)	Law et al., 2012
AT5G03860	250868_at	Symbols: MLS | MLS (MALATE SYNTHASE); malate synthase | chr5:1032103-1034570 REVERSE	Law et al., 2012
AT5G03905	250866_AT	Iron-sulphur cluster biosynthesis family protein; FUNCTIONS IN: iron-sulfur cluster binding, structural molecule activity; INVOLVED IN: iron-sulfur cluster assembly; EXPRESSED IN: 24 plant structures; EXPRESSED DURING: 15 growth stages; CONTAINS InterPro DOMAIN/s: FeS cluster biogenesis (InterPro:IPR000361), FeS cluster insertion	Law et al., 2012
AT5G04050	250878_at	maturase related RNA-directed DNA polymerase (reverse transcriptase); FUNCTIONS IN: RNA binding, RNA-directed DNA polymerase activity; INVOLVED IN: RNA-dependent DNA replication, RNA splicing	Law et al., 2012
AT5G04120	245689_at	phosphoglycerate/bisphosphoglycerate mutase family protein	Law et al., 2012
AT5G04130	259138_s_at	DNA GYRASE B2 (GYRB2); FUNCTIONS IN: DNA topoisomerase activity, DNA topoisomerase (ATP-hydrolyzing) activity, DNA binding, ATP binding; INVOLVED IN: DNA topological change, DNA metabolic process; LOCATED IN: mitochondrion; CONTAINS InterPro DOMAIN/s: DNA topoisomerase, type IIA, conserved site (InterPro:IPR018522), DNA topoisomerase, type IIA, subunit B (InterPro:IPR000565), DNA topoisomerase, t…	Law et al., 2012
AT5G04140	245701_at	Encodes a gene whose sequence is similar to ferredoxin dependent glutamate synthase (Fd-GOGAT). Expression in leaves is induced by light and sucrose. Proposed to be involved in photorespiration and nitrogen assimilation.	Law et al., 2012
AT5G04670	250852_at	similar to nucleic acid binding [Arabidopsis thaliana] (TAIR:AT4G32620.1); similar to unnamed protein product [Vitis vinifera] (GB:CAO46523.1); contains domain PTHR14898 (PTHR14898)	Law et al., 2012
AT5G04750	250863_at	ATP synthase inhibitor protein	Law et al., 2012
AT5G05370	250800_at	ubiquinol-cytochrome C reductase complex ubiquinone-binding protein, putative / ubiquinol-cytochrome C reductase complex 8.2 kDa protein, putative	Law et al., 2012
AT5G05520	250792_at	outer membrane OMP85 family protein	Law et al., 2012
AT5G05980	250757_at	Encodes one of the three folylpolyglutamate synthetase isoforms (FPGSs): FPGS1 (At5g05980, plastidic), FPGS2 (At3g10160, mitochondrial) and FPGS3 (At3g55630, cytosolic).	Law et al., 2012
AT5G06400	250725_at	pentatricopeptide (PPR) repeat-containing protein	Law et al., 2012
AT5G06410	250726_at	DNAJ heat shock N-terminal domain-containing protein; FUNCTIONS IN: heat shock protein binding, chaperone binding; INVOLVED IN: protein folding; EXPRESSED IN: 22 plant structures; EXPRESSED DURING: 13 growth stages; CONTAINS InterPro DOMAIN/s: Heat shock cognate protein B, C-terminal oligomerisation (InterPro:IPR009073), Heat shock protein DnaJ, N-terminal (InterPro:IPR001623), Co-chaperone Hsc20…	Law et al., 2012
AT5G06440	250728_at	similar to unknown protein [Arabidopsis thaliana] (TAIR:AT3G11720.2); similar to unknown protein [Arabidopsis thaliana] (TAIR:AT3G11720.1); similar to unnamed protein product [Vitis vinifera] (GB:CAO39900.1); contains domain Bet v1-like (SSF55961)	Law et al., 2012
AT5G06540	250678_at	pentatricopeptide (PPR) repeat-containing protein	Law et al., 2012
AT5G06580	250691_at	FAD linked oxidase family protein Encodes a protein with glycolate dehydrogenase activity, which was shown to complement various subunits of the E. coli glycolate oxidase complex. It has not been ruled out that the enzyme might be involved in other catalytic activities in vivo. similar to FAD linked oxidase family protein [Arabidopsis thaliana] (TAIR:AT4G36400.2); similar to FAD linked oxidase fa…	Law et al., 2012
AT5G06810	250698_at	mitochondrial transcription termination factor-related / mTERF-related	Law et al., 2012
AT5G07320	250623_at	Mitochondrial substrate carrier family protein; FUNCTIONS IN: binding, calcium ion binding; INVOLVED IN: transport, transmembrane transport; LOCATED IN: mitochondrial inner membrane, membrane; EXPRESSED IN: 23 plant structures; EXPRESSED DURING: 15 growth stages; CONTAINS InterPro DOMAIN/s: EF-Hand 1, calcium-binding site (InterPro:IPR018247), Mitochondrial substrate carrier (InterPro:IPR001993),…	Law et al., 2012
AT5G07440	250580_at	GDH2 (GLUTAMATE DEHYDROGENASE 2); oxidoreductase Encodes the alpha-subunit of the glutamate dehydrogenase. The enzyme is almost exclusively found in the mitochondria of stem and leaf companion cells. Identical to Glutamate dehydrogenase 2 (GDH2) [Arabidopsis Thaliana] (GB:Q38946); similar to glutamate dehydrogenase, putative [Arabidopsis thaliana] (TAIR:AT3G03910.1); similar to GDH1 (GLUTAMATE DE…	Law et al., 2012
AT5G08040	250562_at	TOM5 (MITOCHONDRIAL IMPORT RECEPTOR SUBUNIT TOM5 HOMOLOG)	Law et al., 2012
AT5G08060	250564_at	similar to unknown [Populus trichocarpa] (GB:ABK93975.1)	Law et al., 2012
AT5G08300	246035_at	succinyl-CoA ligase (GDP-forming) alpha-chain, mitochondrial, putative / succinyl-CoA synthetase, alpha chain, putative / SCS-alpha, putative | chr5:2667412-2669923 FORWARD	Law et al., 2012
AT5G08310	246052_at	pentatricopeptide (PPR) repeat-containing protein	Law et al., 2012
AT5G08490	250521_at	pentatricopeptide (PPR) repeat-containing protein	Law et al., 2012
AT5G08530	250534_at		Law et al., 2012
AT5G08570	250526_at	pyruvate kinase, putative	Law et al., 2012
AT5G08690	245715_s_at	ATP binding / hydrogen ion transporting ATP synthase, rotational mechanism	Law et al., 2012
AT5G08740	245716_at	NDC1 (NAD(P)H DEHYDROGENASE C1); NADH dehydrogenase	Law et al., 2012
AT5G09300	245884_at	2-oxoisovalerate dehydrogenase, putative / 3-methyl-2-oxobutanoate dehydrogenase, putative / branched-chain alpha-keto acid dehydrogenase E1 alpha subunit, putative similar to 2-oxoisovalerate dehydrogenase, putative / 3-methyl-2-oxobutanoate dehydrogenase, putative / branched-chain alpha-keto acid dehydrogenase E1 alpha subunit, putative [Arabidopsis thaliana] (TAIR:AT1G21400.1); similar to Os12…	Law et al., 2012
AT5G09420	245879_at	ATTOC64-V/MTOM64 (ARABIDOPSIS THALIANA TRANSLOCON AT THE OUTER MEMBRANE OF CHLOROPLASTS 64-V); amidase	Law et al., 2012
AT5G09450	245888_at	pentatricopeptide (PPR) repeat-containing protein	Law et al., 2012
AT5G09470	245882_at	Encodes one of the mitochondrial dicarboxylate carriers (DIC): DIC1 (AT2G22500), DIC2 (AT4G24570), DIC3 (AT5G09470).	Law et al., 2012
AT5G09570	250515_at	similar to unknown protein [Arabidopsis thaliana] (TAIR:AT5G64400.1); similar to unknown [Populus trichocarpa] (GB:ABK94558.1); contains InterPro domain CHCH (InterPro:IPR010625)	Law et al., 2012
AT5G09590	250502_at	mtHSC70-2 (HEAT SHOCK PROTEIN 70); ATP binding / unfolded protein binding heat shock protein 70 (Hsc70-5); nuclear similar to MTHSC70-1 (mitochondrial heat shock protein 70-1), ATP binding / unfolded protein binding [Arabidopsis thaliana] (TAIR:AT4G37910.1); similar to CPHSC70-1 (chloroplast heat shock protein 70-1), ATP binding / unfolded protein binding [Arabidopsis thaliana] (TAIR:AT4G24280.1)…	Law et al., 2012
AT5G09600	253470_s_at	Succinate dehydrogenase subunit 3	Law et al., 2012
AT5G09770	250495_at	50S ribosomal protein L17	Law et al., 2012
AT5G09840	250504_at	similar to unknown protein [Arabidopsis thaliana] (TAIR:AT5G64710.1); similar to unnamed protein product [Vitis vinifera] (GB:CAO14463.1); contains InterPro domain Protein of unknown function DUF537 (InterPro:IPR007491)	Law et al., 2012
AT5G09950	250508_at	pentatricopeptide (PPR) repeat-containing protein	Law et al., 2012
AT5G10700	246015_at	protein tyrosine phosphatase similar to unnamed protein product [Vitis vinifera] (GB:CAO43922.1); contains InterPro domain Protein-tyrosine phosphatase, low molecular weight; (InterPro:IPR000106)	Law et al., 2012
AT5G10860	250409_at	CBS domain-containing protein Identical to Uncharacterized protein At5g10860, mitochondrial precursor [Arabidopsis Thaliana] (GB:Q9LEV3); similar to unknown protein [Arabidopsis thaliana] (TAIR:AT1G47271.1); similar to unnamed protein product [Vitis vinifera] (GB:CAO21273.1); contains InterPro domain Cystathionine beta-synthase, core (InterPro:IPR000644)	Law et al., 2012
AT5G11310	250388_at	pentatricopeptide (PPR) repeat-containing protein	Law et al., 2012
AT5G11670	250339_at	Symbols: ATNADP-ME2 | ATNADP-ME2 (NADP-malic enzyme 2); malate dehydrogenase (oxaloacetate-decarboxylating) (NADP+)/ malic enzyme/ oxidoreductase, acting on NADH or NADPH, NAD or NADP as acceptor | chr5:3754249-3758242 FORWARD	Law et al., 2012
AT5G11690	250333_at	ATTIM17-3 (Arabidopsis thaliana translocase inner membrane subunit 17-3); P-P-bond-hydrolysis-driven protein transmembrane transporter	Law et al., 2012
AT5G11770	250334_at		Law et al., 2012
AT5G12100	250303_at	pentatricopeptide (PPR) repeat-containing protein	Law et al., 2012
AT5G12290	245206_at	similar to expressed protein [Oryza sativa (japonica cultivar-group)] (GB:ABF96236.1); contains InterPro domain Nuclear control of ATP synthase 2 (InterPro:IPR013946)	Law et al., 2012
AT5G13050	245983_at	5-Formyltetrahydrofolate cycloligase (5-CHO-THF cycloligase - AT5G13050.1) regulates/influences under photorespiratory conditions the activity of another gene product, i.e. serine hydroxymethyltransferase (SHMT) due to accumulating amounts of 5-Formyltetrahydrofolate	Law et al., 2012
AT5G13230	250280_at	pentatricopeptide (PPR) repeat-containing protein	Law et al., 2012
AT5G13420	250234_at	transaldolase, putative similar to unnamed protein product [Vitis vinifera] (GB:CAO68704.1); contains InterPro domain Transaldolase, bacterial/plant type (InterPro:IPR014634); contains InterPro domain Transaldolase subfamily; (InterPro:IPR004732); contains InterPro domain Transaldolase; (InterPro:IPR001585); contains InterPro domain Aldolase-type TIM barrel; (InterPro:IPR013785)	Law et al., 2012
AT5G13440	250235_s_at		Law et al., 2012
AT5G13450	250236_at	ATP synthase OSCP subunit	Law et al., 2012
AT5G13490	245854_at	AAC2 (ADP/ATP CARRIER 2); ATP:ADP antiporter/ binding	Law et al., 2012
AT5G13610	250250_at	similar to unknown protein [Arabidopsis thaliana] (TAIR:AT1G69380.1); similar to unnamed protein product [Vitis vinifera] (GB:CAO69016.1); contains InterPro domain Protein of unknown function DUF155 (InterPro:IPR003734)	Law et al., 2012
AT5G14040	250206_at	phosphate transporter 3;1 (PHT3;1); FUNCTIONS IN: binding; INVOLVED IN: transport, transmembrane transport; LOCATED IN: in 6 components; EXPRESSED IN: 27 plant structures; EXPRESSED DURING: 16 growth stages; CONTAINS InterPro DOMAIN/s: Mitochondrial substrate carrier (InterPro:IPR001993), Mitochondrial substrate/solute carrier (InterPro:IPR018108); BEST Arabidopsis thaliana protein match is: phos…	Law et al., 2012
AT5G14105	250225_at		Law et al., 2012
AT5G14210	250220_at	leucine-rich repeat transmembrane protein kinase, putative similar to leucine-rich repeat transmembrane protein kinase, putative [Arabidopsis thaliana] (TAIR:AT3G03770.1); similar to hypothetical protein [Vitis vinifera] (GB:CAN69961.1); similar to unnamed protein product [Vitis vinifera] (GB:CAO14590.1); contains InterPro domain Protein kinase, core; (InterPro:IPR000719); contains InterPro domai…	Law et al., 2012
AT5G14220	250221_at	HEMG2/MEE61 (maternal effect embryo arrest 61); oxidoreductase/ protoporphyrinogen oxidase	Law et al., 2012
AT5G14300	250171_at	prohibitin 5 (PHB5); CONTAINS InterPro DOMAIN/s: Prohibitin (InterPro:IPR000163), Band 7 protein (InterPro:IPR001107); BEST Arabidopsis thaliana protein match is: prohibitin 4 (TAIR:AT3G27280.1); Has 2683 Blast hits to 2683 proteins in 797 species: Archae - 146; Bacteria - 1077; Metazoa - 455; Fungi - 281; Plants - 201; Viruses - 7; Other Eukaryotes - 516 (source: NCBI BLink).	Law et al., 2012
AT5G14590	250197_at	isocitrate dehydrogenase, putative / NADP+ isocitrate dehydrogenase, putative | chr5:4703298-4706738 REVERSE	Law et al., 2012
AT5G14660	250146_at	PDF1B (PEPTIDE DEFORMYLASE 1B); peptide deformylase encodes a peptide deformylase-like protein Identical to Peptide deformylase, chloroplast precursor (PDF1B) [Arabidopsis Thaliana] (GB:Q9FUZ2;GB:Q8LEH0;GB:Q949U8;GB:Q9LYJ4); similar to PDF1A (PEPTIDE DEFORMYLASE 1A), peptide deformylase [Arabidopsis thaliana] (TAIR:AT1G15390.1); similar to unnamed protein product [Vitis vinifera] (GB:CAO14750.1);…	Law et al., 2012
AT5G14770	246586_at	pentatricopeptide (PPR) repeat-containing protein	Law et al., 2012
AT5G14780	246595_at	FDH (FORMATE DEHYDROGENASE); NAD binding / binding / catalytic/ cofactor binding / oxidoreductase, acting on the CH-OH group of donors, NAD or NADP as acceptor Encodes a NAD-dependent formate dehydrogenase. Identical to Formate dehydrogenase, mitochondrial precursor (FDH1) [Arabidopsis Thaliana] (GB:Q9S7E4); similar to PGDH (3-PHOSPHOGLYCERATE DEHYDROGENASE), phosphoglycerate dehydrogenase [Arabi…	Law et al., 2012
AT5G15090	246546_at	porin, putative / voltage-dependent anion-selective channel protein, putative	Law et al., 2012
AT5G15280	250164_at	pentatricopeptide (PPR) repeat-containing protein	Law et al., 2012
AT5G15320	250168_at	ATP synthase e subunit	Law et al., 2012
AT5G15340	250169_at	pentatricopeptide (PPR) repeat-containing protein	Law et al., 2012
AT5G15640	246528_at	Mitochondrial substrate carrier family protein; FUNCTIONS IN: binding; INVOLVED IN: transport, mitochondrial transport, transmembrane transport; LOCATED IN: mitochondrion, mitochondrial inner membrane; EXPRESSED IN: 24 plant structures; EXPRESSED DURING: 15 growth stages; CONTAINS InterPro DOMAIN/s: Mitochondrial carrier protein (InterPro:IPR002067), Mitochondrial substrate carrier (InterPro:IPR0…	Law et al., 2012
AT5G15700	246514_at	Nucleus encoded plastid RNA polymerase. Localized in mitochondria and chloroplast.	Law et al., 2012
AT5G15810	246521_at	N2,N2-dimethylguanosine tRNA methyltransferase family protein Identical to Probable N [Arabidopsis Thaliana] (GB:Q9LFU5); similar to RNA binding / tRNA (guanine-N2-)-methyltransferase [Arabidopsis thaliana] (TAIR:AT3G02320.1); similar to hypothetical protein [Cleome spinosa] (GB:ABD96899.1); similar to hypothetical protein [Vitis vinifera] (GB:CAN65976.1); similar to hypothetical protein [Cleome …	Law et al., 2012
AT5G15980	246478_at	pentatricopeptide (PPR) repeat-containing protein	Law et al., 2012
AT5G16060	246479_at	similar to hypothetical protein [Cleome spinosa] (GB:ABD96913.1); contains domain PD069074 (PD069074)	Law et al., 2012
AT5G16200	246495_at	50S ribosomal protein L35	Law et al., 2012
AT5G16420	250115_at	pentatricopeptide (PPR) repeat-containing protein similar to MEE40 (maternal effect embryo arrest 40)	Law et al., 2012
AT5G16640	250106_at	pentatricopeptide (PPR) repeat-containing protein	Law et al., 2012
AT5G16715	246509_at	EMB2247 (EMBRYO DEFECTIVE 2247); ATP binding / aminoacyl-tRNA ligase similar to TWN2 (TWIN 2), ATP binding / aminoacyl-tRNA ligase [Arabidopsis thaliana] (TAIR:AT1G14610.1); similar to putative valyl-tRNA synthetase [Oryza sativa (japonica cultivar-group)] (GB:BAC83606.1); similar to hypothetical protein OsJ_022272 [Oryza sativa (japonica cultivar-group)] (GB:EAZ38789.1); similar to hypothetical …	Law et al., 2012
AT5G16870	246420_at	aminoacyl-tRNA hydrolase	Law et al., 2012
AT5G17310	250074_at	UTP--glucose-1-phosphate uridylyltransferase, putative / UDP-glucose pyrophosphorylase, putative / UGPase, putative	Law et al., 2012
AT5G17400	246427_at	ADP, ATP carrier protein, mitochondrial, putative / ADP/ATP translocase, putative / adenine nucleotide translocator, putative	Law et al., 2012
AT5G17530	246412_at	phosphoglucosamine mutase family protein	Law et al., 2012
AT5G17660	250056_at	methyltransferase similar to unnamed protein product [Vitis vinifera] (GB:CAO17868.1); contains InterPro domain Conserved hypothetical protein CHP00091; (InterPro:IPR004395); contains InterPro domain Putative methyltransferase (InterPro:IPR003358)	Law et al., 2012
AT5G17770	250055_at	NADH:cytochrome B5 Reductase	Law et al., 2012
AT5G18070	250015_at	DRT101 (DNA-DAMAGE-REPAIR/TOLERATION 101); intramolecular transferase, phosphotransferases encodes a novel protein involved in DNA repair from UV damage. Isolated by functional complementation of E. coli UV-sensitive mutants (UVR genes). Identical to Phosphoacetylglucosamine mutase (DRT101) [Arabidopsis Thaliana] (GB:P57750;GB:Q05211); similar to unnamed protein product [Vitis vinifera] (GB:CAO64…	Law et al., 2012
AT5G18170	250032_at	GDH1 (GLUTAMATE DEHYDROGENASE 1); oxidoreductase encodes the beta-subunit of the glutamate dehydrogenase. The enzyme is almost exclusively found in the mitochondria of stem and leaf companion cells. Identical to Glutamate dehydrogenase 1 (GDH1) [Arabidopsis Thaliana] (GB:Q43314); similar to GDH2 (GLUTAMATE DEHYDROGENASE 2), oxidoreductase [Arabidopsis thaliana] (TAIR:AT5G07440.1); similar to glut…	Law et al., 2012
AT5G18250	250027_at	similar to unknown protein [Arabidopsis thaliana] (TAIR:AT3G04040.1); similar to unnamed protein product [Vitis vinifera] (GB:CAO23501.1)	Law et al., 2012
AT5G18390	250040_at	pentatricopeptide (PPR) repeat-containing protein	Law et al., 2012
AT5G18400	249984_AT	Cytokine-induced anti-apoptosis inhibitor 1, Fe-S biogenesis; CONTAINS InterPro DOMAIN/s: Protein of unknown function DUF689 (InterPro:IPR007785); BEST Arabidopsis thaliana protein match is: Cytokine-induced anti-apoptosis inhibitor 1, Fe-S biogenesis (TAIR:AT5G18362.1); Has 30201 Blast hits to 17322 proteins in 780 species: Archae - 12; Bacteria - 1396; Metazoa - 17338; Fungi - 3422; Plants - 50…	Law et al., 2012
AT5G18800	249959_at		Law et al., 2012
AT5G18920	249954_at	similar to Os05g0404300 [Oryza sativa (japonica cultivar-group)] (GB:NP_001055502.1); similar to unnamed protein product [Vitis vinifera] (GB:CAO71063.1)	Law et al., 2012
AT5G18950	249952_at	pentatricopeptide (PPR) repeat-containing protein	Law et al., 2012
AT5G19760	245939_at	dicarboxylate/tricarboxylate carrier (DTC)	Law et al., 2012
AT5G19950	246151_at	similar to unknown protein [Arabidopsis thaliana] (TAIR:AT5G63540.2); similar to unknown protein [Arabidopsis thaliana] (TAIR:AT5G63540.1); similar to unknown protein [Oryza sativa (japonica cultivar-group)] (GB:BAD67825.1); contains InterPro domain Region of unknown function DUF1767 (InterPro:IPR013894)	Law et al., 2012
AT5G20040	246152_at	ATIPT9 (Arabidopsis thaliana isopentenyltransferase 9); ATP binding / tRNA isopentenyltransferase Encodes tRNA isopentenyltransferase AtIPT9. similar to ATIPT5 (Arabidopsis thaliana isopentenyltransferase 5), transferase, transferring alkyl or aryl (other than methyl) groups [Arabidopsis thaliana] (TAIR:AT5G19040.1); similar to unnamed protein product [Vitis vinifera] (GB:CAO39375.1); contains In…	Law et al., 2012
AT5G20080	246157_at	NADH-cytochrome b5 reductase, putative Identical to NADH-cytochrome b5 reductase-like protein [Arabidopsis Thaliana] (GB:P83291;GB:Q8LBD3); similar to ATCBR (NADH:CYTOCHROME B5 REDUCTASE 1) [Arabidopsis thaliana] (TAIR:AT5G17770.1); similar to unnamed protein product [Vitis vinifera] (GB:CAO65634.1); contains InterPro domain Flavoprotein pyridine nucleotide cytochrome reductase; (InterPro:IPR0017…	Law et al., 2012
AT5G20090	246156_at	similar to unknown protein [Arabidopsis thaliana] (TAIR:AT4G14695.1); similar to unknown protein [Arabidopsis thaliana] (TAIR:AT4G22310.1); similar to hypothetical protein [Vitis vinifera] (GB:CAN75662.1); contains InterPro domain Protein of unknown function UPF0041 (InterPro:IPR005336)	Law et al., 2012
AT5G20180	246073_at	50S ribosomal protein L36	Law et al., 2012
AT5G20520	246090_at	WAV2 (WAVY GROWTH 2)	Law et al., 2012
AT5G20720	246003_at	CPN20 (CHAPERONIN 20); calmodulin binding Encodes a chloroplast co-chaperonin with similarity to CPN21 from spinach, E.coli GroES. Identical to 20 kDa chaperonin, chloroplast precursor (CPN21) [Arabidopsis Thaliana] (GB:O65282;GB:Q9TNN2); similar to CPN10 (CHAPERONIN 10) [Arabidopsis thaliana] (TAIR:AT1G14980.1); similar to cp10-like protein [Gossypium hirsutum] (GB:AAM77651.1); contains InterPro…	Law et al., 2012
AT5G20980	246185_at	ATMS3 (METHIONINE SYNTHASE 3); 5-methyltetrahydropteroyltriglutamate-homocysteine S-methyltransferase/ methionine synthase encodes a plastidic methionine synthase, involved in methionine de novo synthesis in the chloroplast similar to AtMS2 (Arabidopsis thaliana methionine synthase 2) [Arabidopsis thaliana] (TAIR:AT3G03780.3); similar to ATCIMS (COBALAMIN-INDEPENDENT METHIONINE SYNTHASE) [Arabido…	Law et al., 2012
AT5G22620	249899_at	phosphoglycerate/bisphosphoglycerate mutase family protein	Law et al., 2012
AT5G23060	249876_at	similar to unknown protein [Arabidopsis thaliana] (TAIR:AT3G59780.1); similar to extracellular Ca2+ sensing receptor [Glycine max] (GB:ABY57763.1); contains InterPro domain Rhodanese-like (InterPro:IPR001763)	Law et al., 2012
AT5G23140	249873_at	CLPP2 (Clp protease proteolytic subunit 2); endopeptidase Clp One of several nuclear-encoded ClpPs (caseinolytic protease). Contains a highly conserved catalytic triad of Ser-type proteases (Ser-His-Asp). The name reflects nomenclature described in Adam et. al (2001). Identical to ATP-dependent Clp protease proteolytic subunit 2, mitochondrial precursor (CLPP2) [Arabidopsis Thaliana] (GB:Q9FN42);…	Law et al., 2012
AT5G23250	249828_at	succinyl-CoA ligase (GDP-forming) alpha-chain, mitochondrial, putative / succinyl-CoA synthetase, alpha chain, putative / SCS-alpha, putative | chr5:7830360-7832843 FORWARD	Law et al., 2012
AT5G23300	249830_at	PYRD (PYRIMIDINE D); dihydroorotate dehydrogenase dihydroorotate dehydrogenase, catalyses fourth step of pyrimidine biosynthesis Identical to Dihydroorotate dehydrogenase, mitochondrial precursor (PYRD) [Arabidopsis Thaliana] (GB:P32746;GB:Q9FMX1); similar to dihydroorotate dehydrogenase [Oryza sativa (japonica cultivar-group)] (GB:BAB11988.1); similar to Os04g0676300 [Oryza sativa (japonica cult…	Law et al., 2012
AT5G23600	245131_s_at	tRNA 2'phosphotransferase, putative similar to EMB1067 (EMBRYO DEFECTIVE 1067), tRNA 2'-phosphotransferase [Arabidopsis thaliana] (TAIR:AT2G45330.2); similar to EMB1067 (EMBRYO DEFECTIVE 1067), tRNA 2'-phosphotransferase [Arabidopsis thaliana] (TAIR:AT2G45330.1); similar to unnamed protein product [Vitis vinifera] (GB:CAO24541.1); contains InterPro domain Phosphotransferase KptA/Tpt1; (InterPro:I…	Law et al., 2012
AT5G24650	249751_at	mitochondrial import inner membrane translocase subunit Tim17/Tim22/Tim23 family protein	Law et al., 2012
AT5G24840	246965_at	methyltransferase Identical to Probable tRNA [Arabidopsis Thaliana] (GB:Q8GXB7); similar to methyltransferase [Arabidopsis thaliana] (TAIR:AT5G17660.1); similar to unnamed protein product [Vitis vinifera] (GB:CAO43956.1); contains InterPro domain Conserved hypothetical protein CHP00091; (InterPro:IPR004395); contains InterPro domain Putative methyltransferase (InterPro:IPR003358)	Law et al., 2012
AT5G25450	246944_at	ubiquinol-cytochrome C reductase complex 14 kDa protein, putative	Law et al., 2012
AT5G25880	246915_at	Symbols: ATNADP-ME3 | ATNADP-ME3 (NADP-malic enzyme 3); malate dehydrogenase (oxaloacetate-decarboxylating) (NADP+)/ malic enzyme/ oxidoreductase, acting on NADH or NADPH, NAD or NADP as acceptor | chr5:9024549-9028377 FORWARD	Law et al., 2012
AT5G25940	246863_at	early nodulin-related similar to hypothetical protein OsJ_005787 [Oryza sativa (japonica cultivar-group)] (GB:EAZ22304.1); contains InterPro domain Early nodulin 93 ENOD93 protein (InterPro:IPR005050)	Law et al., 2012
AT5G26030	246870_at	FC1 (FERROCHELATASE 1); ferrochelatase	Law et al., 2012
AT5G26200	246854_at	Mitochondrial substrate carrier family protein; FUNCTIONS IN: binding; INVOLVED IN: transport, mitochondrial transport, transmembrane transport; LOCATED IN: mitochondrial inner membrane, membrane; EXPRESSED IN: 7 plant structures; EXPRESSED DURING: 7 growth stages; CONTAINS InterPro DOMAIN/s: Mitochondrial carrier protein (InterPro:IPR002067), Mitochondrial substrate carrier (InterPro:IPR001993),…	Law et al., 2012
AT5G26710	246845_at	glutamate-tRNA ligase, putative / glutamyl-tRNA synthetase, putatuve / GluRS, putative	Law et al., 2012
AT5G26780	246800_at	SHM2 (SERINE HYDROXYMETHYLTRANSFERASE 2); glycine hydroxymethyltransferase Encodes a protein with serine hydroxymethyltransferase activity which is thought to be localized in the mitochondrial matrix. SHM2 expression fails to rescue the conditional lethal phenotype of the shm1-1 mutant, defective in SHM1. similar to SHM1 (SERINE HYDROXYMETHYLTRANSFERASE 1), glycine hydroxymethyltransferase/ poly(…	Law et al., 2012
AT5G26830	246801_at	threonyl-tRNA synthetase / threonine--tRNA ligase (THRRS) Identical to Threonyl-tRNA synthetase, mitochondrial precursor (THRRS) [Arabidopsis Thaliana] (GB:O04630;GB:O81907;GB:Q84TG4;GB:Q94AG0); similar to EMB2761 (EMBRYO DEFECTIVE 2761), threonine-tRNA ligase [Arabidopsis thaliana] (TAIR:AT2G04842.1); similar to predicted protein [Physcomitrella patens subsp. patens] (GB:EDQ50872.1); similar to …	Law et al., 2012
AT5G26860	246850_at	LON_ARA_ARA (Lon protease homolog gene); ATP binding / ATP-dependent peptidase/ serine-type peptidase LON protease homolog (LON_ARA) mRNA, nuclear gene encoding Identical to Lon protease homolog 2, mitochondrial precursor [Arabidopsis Thaliana] (GB:P93655;GB:O04954;GB:Q8RWX1); similar to Lon protease, putative [Arabidopsis thaliana] (TAIR:AT3G05790.1); similar to Lon protease, putative [Arabidops…	Law et al., 2012
AT5G26910	246820_at	similar to unknown protein [Arabidopsis thaliana] (TAIR:AT3G58650.1); similar to unknown protein [Arabidopsis thaliana] (TAIR:AT3G05750.1); similar to unknown protein [Arabidopsis thaliana] (TAIR:AT3G05750.2); similar to unnamed protein product [Vitis vinifera] (GB:CAO17458.1)	Law et al., 2012
AT5G27460	246770_at	pentatricopeptide (PPR) repeat-containing protein	Law et al., 2012
AT5G27520	246779_at	mitochondrial substrate carrier family protein	Law et al., 2012
AT5G27540	246775_at	EMB2473 (EMBRYO DEFECTIVE 2473); GTP binding	Law et al., 2012
AT5G27760	246744_at	hypoxia-responsive family protein similar to hypoxia-responsive family protein [Arabidopsis thaliana] (TAIR:AT3G05550.1); similar to hypoxia-responsive family protein [Citrus sinensis] (GB:AAZ05072.1); contains InterPro domain Hypoxia induced protein conserved region (InterPro:IPR007667)	Law et al., 2012
AT5G27820	246746_at	50S ribosomal protein L18	Law et al., 2012
AT5G28460	246173_s_at	pentatricopeptide (PPR) repeat-containing protein	Law et al., 2012
AT5G34780	260900_s_at	dehydrogenase E1 component family protein	Law et al., 2012
AT5G35630	249710_at	GS2 (GLUTAMINE SYNTHETASE 2); glutamate-ammonia ligase chloroplastic glutamine synthetase Identical to Glutamine synthetase, chloroplast/mitochondrial precursor (GLN2) [Arabidopsis Thaliana] (GB:Q43127); similar to ATGSR1 (Arabidopsis thaliana glutamine synthase clone R1), glutamate-ammonia ligase [Arabidopsis thaliana] (TAIR:AT5G37600.1); similar to Glutamine synthetase, chloroplast precursor (G…	Law et al., 2012
AT5G36950	249641_at	DEGP10 (DEGP PROTEASE 10); serine-type peptidase/ trypsin Encodes a putative DegP protease. Identical to Protease Do-like 10, mitochondrial precursor (DEGP10) [Arabidopsis Thaliana] (GB:Q9FIV6); similar to DEGP3 (DEGP PROTEASE 3), serine-type peptidase/ trypsin [Arabidopsis thaliana] (TAIR:AT1G65630.1); similar to unnamed protein product [Vitis vinifera] (GB:CAO15604.1); similar to hypothetical p…	Law et al., 2012
AT5G37510	249627_at		Law et al., 2012
AT5G38290	249554_at	peptidyl-tRNA hydrolase family protein Identical to Chloroplastic group IIB intron splicing facilitator CRS2-A, chloroplast precursor (CRS2A) [Arabidopsis Thaliana] (GB:Q9FKN4;GB:Q8GX67); similar to peptidyl-tRNA hydrolase family protein [Arabidopsis thaliana] (TAIR:AT5G16140.1); similar to peptidyl-tRNA hydrolase family protein [Arabidopsis thaliana] (TAIR:AT5G16140.2); similar to unnamed protei…	Law et al., 2012
AT5G38710	249527_at	Methylenetetrahydrofolate reductase family protein; FUNCTIONS IN: proline dehydrogenase activity; INVOLVED IN: oxidation reduction, proline catabolic process, glutamate biosynthetic process; EXPRESSED IN: 21 plant structures; EXPRESSED DURING: 12 growth stages; CONTAINS InterPro DOMAIN/s: Proline dehydrogenase (InterPro:IPR002872), Proline oxidase (InterPro:IPR015659); BEST Arabidopsis thaliana p…	Law et al., 2012
AT5G38750	249530_at	asparaginyl-tRNA synthetase family similar to SYNC1 (EMBRYO DEFECTIVE 2755), ATP binding / aminoacyl-tRNA ligase/ asparagine-tRNA ligase/ aspartate-tRNA ligase/ nucleic acid binding / nucleotide binding [Arabidopsis thaliana] (TAIR:AT5G56680.1); similar to unnamed protein product [Vitis vinifera] (GB:CAO65407.1); contains domain Class II aaRS and biotin synthetases (SSF55681)	Law et al., 2012
AT5G39350	249470_at	pentatricopeptide (PPR) repeat-containing protein	Law et al., 2012
AT5G39410	249456_at	binding / catalytic unknown protein	Law et al., 2012
AT5G39710	249464_at	EMB2745 (EMBRYO DEFECTIVE 2745) similar to pentatricopeptide (PPR) repeat-containing protein	Law et al., 2012
AT5G39900	249430_at	GTP binding / translation elongation factor similar to GTP-binding protein LepA, putative [Arabidopsis thaliana] (TAIR:AT5G08650.1); similar to unnamed protein product [Vitis vinifera] (GB:CAO14916.1); similar to predicted protein [Physcomitrella patens subsp. patens] (GB:EDQ74230.1); similar to GFP binding protein [Brachypodium sylvaticum] (GB:ABL85044.1); contains InterPro domain Translation el…	Law et al., 2012
AT5G39960	249434_at	GTP binding	Law et al., 2012
AT5G40080	249424_s_at	50S ribosomal protein L27a	Law et al., 2012
AT5G40650	249343_at	SDH2-2 (succinate dehydrogenase 2-2)	Law et al., 2012
AT5G40660	249342_at	ATP12 protein-related	Law et al., 2012
AT5G40770	249344_at	prohibitin 3	Law et al., 2012
AT5G40810	249324_at	cytochrome c1, putative	Law et al., 2012
AT5G40930	249322_at	TOM20-4 (TRANSLOCASE OF OUTER MEMBRANE 20-4)	Law et al., 2012
AT5G41170	249341_at	pentatricopeptide (PPR) repeat-containing protein	Law et al., 2012
AT5G41350	249308_at	zinc finger (C3HC4-type RING finger) family protein similar to RHB1A (RING-H2 finger B1A), protein binding / zinc ion binding [Arabidopsis thaliana] (TAIR:AT4G00335.1); similar to RHB1A (RING-H2 finger B1A), protein binding / zinc ion binding [Arabidopsis thaliana] (TAIR:AT4G00335.2); similar to unnamed protein product [Vitis vinifera] (GB:CAO65940.1); contains InterPro domain Zinc finger, RING/F…	Law et al., 2012
AT5G41480	249304_at	Encodes a dihydrofolate synthetase based on yeast complementation experiments. This protein is involved in folate biosynthesis.	Law et al., 2012
AT5G41670	249266_at	6-phosphogluconate dehydrogenase family protein similar to 6-phosphogluconate dehydrogenase family protein [Arabidopsis thaliana] (TAIR:AT3G02360.2); similar to 6-phosphogluconate dehydrogenase family protein [Arabidopsis thaliana] (TAIR:AT1G64190.1); similar to 6-phosphogluconate dehydrogenase family protein [Arabidopsis thaliana] (TAIR:AT3G02360.1); similar to predicted protein [Physcomitrella …	Law et al., 2012
AT5G41685	249268_at	mitochondrial import receptor subunit TOM7 / translocase of outer membrane 7 kDa subunit (TOM7.1)	Law et al., 2012
AT5G41970	249238_at	similar to unknown protein [Arabidopsis thaliana] (TAIR:AT3G49320.1); similar to unnamed protein product [Vitis vinifera] (GB:CAO62930.1); contains InterPro domain Metal-dependent protein hydrolase (InterPro:IPR003226)	Law et al., 2012
AT5G42130	249224_at	mitochondrial substrate carrier family protein	Law et al., 2012
AT5G42150	249233_at	electron carrier/ protein disulfide oxidoreductase similar to unnamed protein product [Vitis vinifera] (GB:CAO68204.1); contains InterPro domain Thioredoxin-like fold (InterPro:IPR012336); contains InterPro domain Glutathione S-transferase, C-terminal-like (InterPro:IPR010987); contains InterPro domain Thioredoxin fold (InterPro:IPR012335); contains InterPro domain Glutaredoxin; (InterPro:IPR0021…	Law et al., 2012
AT5G42310	249247_at	pentatricopeptide (PPR) repeat-containing protein	Law et al., 2012
AT5G42390	249218_at	metalloendopeptidase similar to peptidase M16 family protein / insulinase family protein [Arabidopsis thaliana] (TAIR:AT5G56730.1); similar to unnamed protein product [Vitis vinifera] (GB:CAO66322.1); similar to metalloendopeptidase (GB:AAA81472.1); similar to hypothetical protein OsJ_021174 [Oryza sativa (japonica cultivar-group)] (GB:EAZ37691.1); contains InterPro domain Peptidase M16, N-termin…	Law et al., 2012
AT5G42650	249208_at	AOS (ALLENE OXIDE SYNTHASE); hydro-lyase/ oxygen binding Encodes a member of the cytochrome p450 CYP74 gene family that functions as an allene oxide synthase. This enzyme catalyzes dehydration of the hydroperoxide to an unstable allene oxide in the JA biosynthetic pathway. It shows a dual catalytic activity, the major one being a 13-AOS but also expressing a 9-AOS activity. Identical to Cytochrom…	Law et al., 2012
AT5G42740	249163_at	glucose-6-phosphate isomerase, cytosolic	Law et al., 2012
AT5G42980	249176_at	ATTRX3 (thioredoxin H-type 3); thiol-disulfide exchange intermediate encodes a cytosolic thioredoxin that reduces disulfide bridges of target proteins by the reversible formation of a disulfide bridge between two neighboring Cys residues present in the active site. Thioredoxins have been found to regulate a variety of biological reactions in prokaryotic and eukaryotic cells. Identical to Thioredo…	Law et al., 2012
AT5G43150	249134_at	similar to unnamed protein product [Vitis vinifera] (GB:CAO61459.1)	Law et al., 2012
AT5G43430	249158_at	ETFBETA | ; electron carrier | chr5:17453598-17455296 FORWARD	Law et al., 2012
AT5G43780	249112_at	APS4 sulfate adenylyltransferase, ATP sulfurylase similar to APS3 (ATP sulfurylase 2), sulfate adenylyltransferase (ATP) [Arabidopsis thaliana] (TAIR:AT4G14680.1); similar to APS1 (ATP sulfurylase 3) [Arabidopsis thaliana] (TAIR:AT3G22890.1); similar to APS2 (ATP SULFURYLASE PRECURSOR) [Arabidopsis thaliana] (TAIR:AT1G19920.1); similar to ATP sulfurylase [Brassica juncea] (GB:CAA11417.1); similar…	Law et al., 2012
AT5G43970	249076_at	TOM22-V (TRANSLOCASE OUTER MITOCHONDRIAL MEMBRANE 22-V)	Law et al., 2012
AT5G44090	249081_at	calcium-binding EF hand family protein, putative / protein phosphatase 2A 62 kDa B'' regulatory subunit, putative similar to calcium-binding EF hand family protein [Arabidopsis thaliana] (TAIR:AT1G03960.1); similar to calcium-binding EF-hand family protein [Arabidopsis thaliana] (TAIR:AT1G54450.1); similar to calcium-binding EF hand family protein [Arabidopsis thaliana] (TAIR:AT5G28850.2); simila…	Law et al., 2012
AT5G44140	249083_at	prohibitin 7 (PHB7); INVOLVED IN: biological_process unknown; LOCATED IN: mitochondrion, respiratory chain complex I, membrane; EXPRESSED IN: leaf; CONTAINS InterPro DOMAIN/s: Prohibitin (InterPro:IPR000163), Band 7 protein (InterPro:IPR001107); BEST Arabidopsis thaliana protein match is: prohibitin 2 (TAIR:AT1G03860.3); Has 4401 Blast hits to 4399 proteins in 1362 species: Archae - 186; Bacteria…	Law et al., 2012
AT5G46160	248878_at	ribosomal protein L14 family protein / huellenlos paralog (HLP) similar to HLL (HUELLENLOS), structural constituent of ribosome [Arabidopsis thaliana] (TAIR:AT1G17560.1); similar to unnamed protein product [Vitis vinifera] (GB:CAO40344.1); contains InterPro domain Ribosomal protein L14b/L23e; (InterPro:IPR000218); contains InterPro domain Ribosomal protein L14, bacterial-type; (InterPro:IPR005745)	Law et al., 2012
AT5G46460	248874_at	pentatricopeptide (PPR) repeat-containing protein	Law et al., 2012
AT5G46800	248838_at	BOU (A BOUT DE SOUFFLE); binding	Law et al., 2012
AT5G46920	248815_at	Intron maturase, type II family protein; FUNCTIONS IN: RNA binding, RNA-directed DNA polymerase activity; INVOLVED IN: RNA-dependent DNA replication, RNA splicing	Law et al., 2012
AT5G47030	248825_at	ATP synthase delta subunit	Law et al., 2012
AT5G47250	248835_at	disease resistance protein (CC-NBS-LRR class), putative Identical to Probable disease resistance protein At5g47250 [Arabidopsis Thaliana] (GB:Q9LVT4;GB:Q0WVJ2); similar to disease resistance protein (CC-NBS-LRR class), putative [Arabidopsis thaliana] (TAIR:AT1G12280.1); similar to RFL1 [Arabidopsis lyrata] (GB:AAL65637.1); contains InterPro domain Disease resistance protein; (InterPro:IPR000767);…	Law et al., 2012
AT5G47360	248783_at	pentatricopeptide (PPR) repeat-containing protein	Law et al., 2012
AT5G47435	248802_at	encodes one of the two putative formyltetrahydrofolate deformylase. Located in the mitochondrion. Involved in photorespiratory tetrahydrofolate cycle.	Law et al., 2012
AT5G47455	248762_at	Unknown function	Law et al., 2012
AT5G47460	248803_at	pentatricopeptide (PPR) repeat-containing protein	Law et al., 2012
AT5G47570	248760_at		Law et al., 2012
AT5G47580	248766_at	similar to unknown protein [Arabidopsis thaliana] (TAIR:AT4G17250.1); similar to hypothetical protein [Vitis vinifera] (GB:CAN71257.1); similar to hypothetical protein 40.t00008 [Brassica oleracea] (GB:ABD65133.1); similar to unnamed protein product [Vitis vinifera] (GB:CAO16486.1)	Law et al., 2012
AT5G47630	248753_at	MTACP3 (MITOCHONDRIAL ACYL CARRIER PROTEIN 3); acyl carrier Encodes a member of the mitochondrial acyl carrier protein (ACP) family. Its role is currently obscure as it is weakly expressed and has not yet been identified by mitochondrial proteome analysis. similar to mtACP-1 (MITOCHONDRIAL ACYL CARRIER PROTEIN 1), acyl carrier [Arabidopsis thaliana] (TAIR:AT2G44620.1); similar to acyl carrier pro…	Law et al., 2012
AT5G47810	248722_at	PFK2 (PHOSPHOFRUCTOKINASE 2); 6-phosphofructokinase	Law et al., 2012
AT5G47890	248746_at		Law et al., 2012
AT5G48030	248739_at	GFA2 (GAMETOPHYTIC FACTOR 2); heat shock protein binding / unfolded protein binding	Law et al., 2012
AT5G48330	248693_at	regulator of chromosome condensation (RCC1) family protein	Law et al., 2012
AT5G48550	248707_at	F-box family protein-related Identical to F-box protein At5g48550 [Arabidopsis Thaliana] (GB:Q1PDL6;GB:Q9FJL5); similar to F-box family protein [Arabidopsis thaliana] (TAIR:AT1G47730.1); similar to Os09g0448100 [Oryza sativa (japonica cultivar-group)] (GB:NP_001063316.1); contains InterPro domain Cyclin-like F-box (InterPro:IPR001810); contains InterPro domain F-box associated type 1 (InterPro:IP…	Law et al., 2012
AT5G48970	248629_at	Mitochondrial substrate carrier family protein; FUNCTIONS IN: binding; INVOLVED IN: transport, mitochondrial transport, transmembrane transport; LOCATED IN: mitochondrial inner membrane, membrane; EXPRESSED IN: 24 plant structures; EXPRESSED DURING: 15 growth stages; CONTAINS InterPro DOMAIN/s: Mitochondrial carrier protein (InterPro:IPR002067), Mitochondrial substrate carrier (InterPro:IPR001993…	Law et al., 2012
AT5G49030	248634_at	OVA2 (OVULE ABORTION 2); ATP binding / aminoacyl-tRNA ligase similar to isoleucyl-tRNA synthetase, putative / isoleucine--tRNA ligase, putative [Arabidopsis thaliana] (TAIR:AT4G10320.1); similar to hypothetical protein OsJ_008295 [Oryza sativa (japonica cultivar-group)] (GB:EAZ24812.1); similar to unnamed protein product [Vitis vinifera] (GB:CAO70990.1); similar to hypothetical protein OsI_008974…	Law et al., 2012
AT5G49460	248608_at	Symbols: ACLB-2 | ACLB-2 (ATP CITRATE LYASE SUBUNIT B 2); ATP citrate synthase | chr5:20054523-20058464 FORWARD	Law et al., 2012
AT5G49555	248613_at	amine oxidase-related similar to CRTISO (CAROTENOID ISOMERASE), carotenoid isomerase [Arabidopsis thaliana] (TAIR:AT1G06820.1); similar to unnamed protein product [Vitis vinifera] (GB:CAO22845.1); similar to unnamed protein product [Vitis vinifera] (GB:CAO22844.1); similar to predicted protein [Physcomitrella patens subsp. patens] (GB:EDQ57569.1); contains InterPro domain Phytoene dehydrogenase-r…	Law et al., 2012
AT5G50370	248506_at	adenylate kinase, putative Identical to Adenylate kinase 2 (ADK2) [Arabidopsis Thaliana] (GB:Q9FK35;GB:Q8LD90); similar to ADK1 (ADENYLATE KINASE 1), adenylate kinase [Arabidopsis thaliana] (TAIR:AT5G63400.1); similar to Os11g0312400 [Oryza sativa (japonica cultivar-group)] (GB:NP_001067759.1); similar to unknown [Populus trichocarpa] (GB:ABK93572.1); contains InterPro domain Adenylate kinase; (I…	Law et al., 2012
AT5G50810	248473_at	TIM8 (Arabidopsis thaliana translocase inner membrane subunit 8); P-P-bond-hydrolysis-driven protein transmembrane transporter	Law et al., 2012
AT5G50850	248474_at	MAB1 (MACCI-BOU); catalytic/ pyruvate dehydrogenase (acetyl-transferring) | chr5:20689390-20693285 FORWARD	Law et al., 2012
AT5G50920	248480_at	CLPC (HEAT SHOCK PROTEIN 93-V); ATP binding / ATPase Encodes a protein that is similar to ATP-dependent Clp protease ATP-binding subunit / ClpC. Involved in protein import into the chloroplast. May provide ATP source that drives the TIC (Translocon at the Inner envelope membrane of Chloroplasts) translocation machinery. similar to ATCLPC (CASEINOLYTIC PROTEASE C), ATP binding / ATPase [Arabidopsi…	Law et al., 2012
AT5G50950	248461_s_at	fumarate hydratase, putative / fumarase, putative | chr5:20729612-20733516 FORWARD	Law et al., 2012
AT5G51050	248485_at	Mitochondrial substrate carrier family protein; FUNCTIONS IN: binding, calcium ion binding; INVOLVED IN: transport, transmembrane transport; LOCATED IN: mitochondrial inner membrane, membrane; EXPRESSED IN: 23 plant structures; EXPRESSED DURING: 15 growth stages; CONTAINS InterPro DOMAIN/s: EF-Hand 1, calcium-binding site (InterPro:IPR018247), Mitochondrial substrate carrier (InterPro:IPR001993),…	Law et al., 2012
AT5G51440	248434_at	23.5 kDa mitochondrial small heat shock protein (HSP23.5-M) similar to ATHSP23.6-MITO (MITOCHONDRION-LOCALIZED SMALL HEAT SHOCK PROTEIN 23.6) [Arabidopsis thaliana] (TAIR:AT4G25200.1); similar to hypothetical protein [Vitis vinifera] (GB:CAN66697.1); contains InterPro domain HSP20-like chaperone (InterPro:IPR008978); contains InterPro domain Heat shock protein Hsp20 (InterPro:IPR002068)	Law et al., 2012
AT5G51610	248414_at	50S ribosomal protein L11	Law et al., 2012
AT5G51740	248426_at	peptidase M48 family protein similar to unnamed protein product [Vitis vinifera] (GB:CAO49766.1); contains InterPro domain Peptidase M48, Ste24p; (InterPro:IPR001915)	Law et al., 2012
AT5G51820	248380_at	PGM (PHOSPHOGLUCOMUTASE); phosphoglucomutase	Law et al., 2012
AT5G51830	248381_at	pfkB-type carbohydrate kinase family protein	Law et al., 2012
AT5G52060	248393_at	ATBAG1 (ARABIDOPSIS THALIANA BCL-2-ASSOCIATED ATHANOGENE 1); protein binding A member of Arabidopsis BAG (Bcl-2-associated athanogene) proteins, plant homologs of mammalian regulators of apoptosis. Plant BAG proteins are multi-functional and remarkably similar to their animal counterparts, as they regulate apoptotic-like processes ranging from pathogen attack, to abiotic stress, to plant developm…	Law et al., 2012
AT5G52520	248339_at	OVA6/PRORS1 (OVULE ABORTION 6); ATP binding / aminoacyl-tRNA ligase similar to tRNA synthetase class II (G, H, P and S) family protein [Arabidopsis thaliana] (TAIR:AT3G62120.1); similar to tRNA synthetase class II (G, H, P and S) family protein [Arabidopsis thaliana] (TAIR:AT3G62120.2); similar to hypothetical protein [Vitis vinifera] (GB:CAN76962.1); similar to prolyl-tRNA synthetase [Raphanus s…	Law et al., 2012
AT5G52840	248288_at		Law et al., 2012
AT5G52920	248283_at	PKP-BETA1 (PLASTIDIC PYRUVATE KINASE BETA SUBUNIT 1); pyruvate kinase	Law et al., 2012
AT5G53070	248295_at	50S ribosomal protein L9	Law et al., 2012
AT5G53170	248303_at	FTSH11 (FtsH protease 11); ATP-dependent peptidase/ ATPase/ metallopeptidase encodes an FtsH protease that is localized to the chloroplast and the mitochondrion similar to FTSH4 (FtsH protease 4), ATP-dependent peptidase/ ATPase/ metallopeptidase [Arabidopsis thaliana] (TAIR:AT2G26140.1); similar to hypothetical protein [Vitis vinifera] (GB:CAN66870.1); similar to Ftsh-like protease [Pisum sativu…	Law et al., 2012
AT5G53350	248255_at	CLPX (Clp protease regulatory subunit X); ATPase CLP protease regulatory subunit CLPX mRNA, nuclear gene similar to ATP-dependent Clp protease ATP-binding subunit ClpX, putative [Arabidopsis thaliana] (TAIR:AT1G33360.1); similar to hypothetical protein [Vitis vinifera] (GB:CAN75136.1); contains InterPro domain ATPase AAA-2 (InterPro:IPR013093); contains InterPro domain AAA+ ATPase, core; (InterPr…	Law et al., 2012
AT5G53880	248186_at	similar to unknown [Populus trichocarpa] (GB:ABK92577.1)	Law et al., 2012
AT5G53920	248239_at	50S ribosomal protein L11 methyltransferase	Law et al., 2012
AT5G54580	248173_at	RNA recognition motif (RRM)-containing protein	Law et al., 2012
AT5G54600	248174_at	50S ribosomal protein L24	Law et al., 2012
AT5G54770	248128_at	Encodes a thiamine biosynthetic gene that has a dual function in thiamine biosynthesis and mitochondrial DNA damage tolerance. It appears to be involved in producing the thiazole portion of thiamine (vitamin B1). A crystal structure of the protein reveals that it forms a 2-ring homo-octamer.	Law et al., 2012
AT5G54780	248129_at	RAB GTPase activator similar to RAB GTPase activator [Arabidopsis thaliana] (TAIR:AT4G27100.2); similar to RAB GTPase activator [Arabidopsis thaliana] (TAIR:AT4G27100.1); similar to unnamed protein product [Vitis vinifera] (GB:CAO39011.1); contains InterPro domain RabGAP/TBC; (InterPro:IPR000195)	Law et al., 2012
AT5G54950	248137_at	aconitate hydratase-related / citrate hydro-lyase-related / aconitase-related | chr5:22309832-22310242 REVERSE	Law et al., 2012
AT5G55070	248088_at	2-oxoacid dehydrogenase family protein | chr5:22347211-22350817 FORWARD	Law et al., 2012
AT5G55140	248102_at	50S ribosomal protein L30	Law et al., 2012
AT5G55200	248101_at	co-chaperone grpE protein, putative	Law et al., 2012
AT5G55610	248068_at	unknown protein	Law et al., 2012
AT5G55660	248070_at	GTP binding / RNA binding similar to unknown protein [Arabidopsis thaliana] (TAIR:AT4G26630.2); similar to unknown protein [Arabidopsis thaliana] (TAIR:AT4G26630.1); similar to unnamed protein product [Vitis vinifera] (GB:CAO45121.1); contains InterPro domain DEK C terminal (InterPro:IPR014876)	Law et al., 2012
AT5G55740	248075_at	CRR21 (CHLORORESPIRATORY REDUCTION 21) Encodes a member of the E+ subgroup of the PPR protein family, containing the E and E+ motifs following a tandem array of PPR motifs. It also contains an unknown motif consisting of 15 aa, which is highly conserved in some PPR proteins, including CRR4. CRR21 is involved in RNA editing of the site 2 of ndhD (ndhD-2),which encodes a subunit of the NDH complex.…	Law et al., 2012
AT5G56010	248043_s_at	HSP81-3 (Heat shock protein 81-3); ATP binding a member of heat shock protein 90 (HSP90) gene family. Expressed in all tissues and abundant in root apical meristem, pollen and tapetum. Expression is NOT heat-induced but induced by IAA and NaCl. Identical to Heat shock protein 81-3 (HSP81-3) [Arabidopsis Thaliana] (GB:P51818;GB:O03985;GB:Q8VYT8;GB:Q94A60;GB:Q9FKU5); similar to heat shock protein 8…	Law et al., 2012
AT5G56030	248045_at	HSP81-2 (EARLY-RESPONSIVE TO DEHYDRATION 8); ATP binding a member of heat shock protein 90 (HSP90) gene family. Expressed in all tissues and abundant in root apical meristem, pollen and tapetum. Expression is NOT heat-induced but induced by IAA and NaCl. Identical to Heat shock protein 81-2 (HSP81-2) [Arabidopsis Thaliana] (GB:P55737); similar to heat shock protein 81-4 (HSP81-4) [Arabidopsis tha…	Law et al., 2012
AT5G56090	248049_at	Involved in COX biogenesis	Law et al., 2012
AT5G56310	248012_at	pentatricopeptide (PPR) repeat-containing protein	Law et al., 2012
AT5G56350	247989_at	pyruvate kinase, putative	Law et al., 2012
AT5G56450	248023_at	Mitochondrial substrate carrier family protein; FUNCTIONS IN: binding, transporter activity; INVOLVED IN: transport, mitochondrial transport, transmembrane transport; LOCATED IN: mitochondrial inner membrane, membrane; EXPRESSED IN: 23 plant structures; EXPRESSED DURING: 15 growth stages; CONTAINS InterPro DOMAIN/s: Mitochondrial carrier protein (InterPro:IPR002067), Mitochondrial substrate carri…	Law et al., 2012
AT5G56500	248021_at	ATP binding / protein binding / unfolded protein binding similar to CPN60B (CHAPERONIN 60 BETA), ATP binding / protein binding / unfolded protein binding [Arabidopsis thaliana] (TAIR:AT1G55490.1); similar to chaperonin, putative [Arabidopsis thaliana] (TAIR:AT3G13470.1); similar to CPN60B (CHAPERONIN 60 BETA), ATP binding / protein binding / unfolded protein binding [Arabidopsis thaliana] (TAIR:A…	Law et al., 2012
AT5G56630	247983_at	PFK7 (PHOSPHOFRUCTOKINASE 7); 6-phosphofructokinase	Law et al., 2012
AT5G56940	247935_at	30S ribosomal protein S16	Law et al., 2012
AT5G57300	247901_at	ubiquinone biosynthesis methyltransfer-ase (UbiE)	Law et al., 2012
AT5G57440	247908_at	GS1 (GLYCEROL-3-PHOSPHATASE 2); hydrolase a member of haloacid dehalogenase-like hydrolase family similar to GPP1 (GLYCEROL-3-PHOSPHATASE 1), hydrolase [Arabidopsis thaliana] (TAIR:AT4G25840.1); similar to unnamed protein product [Vitis vinifera] (GB:CAO43230.1); contains InterPro domain Haloacid dehalogenase-like hydrolase; (InterPro:IPR005834); contains InterPro domain HAD-superfamily hydrolase…	Law et al., 2012
AT5G57490	247923_at	porin, putative	Law et al., 2012
AT5G57815	247865_at	cytochrome c oxidase subunit 6b, putative	Law et al., 2012
AT5G58070	247851_at	lipocalin, putative similar to temperature-induced lipocalin [Brassica napus] (GB:ABB02398.1); contains InterPro domain Lipocalin-like (InterPro:IPR013208); contains InterPro domain Lipocalin, bacterial and plant; (InterPro:IPR002446); contains InterPro domain Calycin-like (InterPro:IPR011038); contains InterPro domain Calycin; (InterPro:IPR012674)	Law et al., 2012
AT5G58970	247746_at	(UNCOUPLING PROTEIN 2); oxidative phosphorylation uncoupler	Law et al., 2012
AT5G59440	247735_at	thymidylate kinase gene (TMPK), Encodes thymidylate kinase which exists in two isoforms in plants. The longer variant of 263 amino acids with a N-terminal extension that is required for localization to the mitochondrion. The second isoform of 224 residues is localized to the cytoplasm and nucleoplasm. Peak of expression occurs during G1/S phase transition.	Law et al., 2012
AT5G59880	247658_at	ADF3 (ACTIN DEPOLYMERIZING FACTOR 3); actin binding Encodes actin depolymerizing factor 3 (ADF3). Identical to Actin-depolymerizing factor 3 (ADF3) [Arabidopsis Thaliana] (GB:Q9ZSK4); similar to ADF1 (ACTIN DEPOLYMERIZING FACTOR 1) [Arabidopsis thaliana] (TAIR:AT3G46010.1); similar to ADF4 (ACTIN DEPOLYMERIZING FACTOR 4), actin binding [Arabidopsis thaliana] (TAIR:AT5G59890.1); similar to actin-d…	Law et al., 2012
AT5G59900	247701_at	pentatricopeptide (PPR) repeat-containing protein	Law et al., 2012
AT5G60640	247588_at	ATPDIL1-4 (PDI-LIKE 1-4); thiol-disulfide exchange intermediate Encodes a protein disulfide isomerase-like (PDIL) protein, a member of a multigene family within the thioredoxin (TRX) superfamily. similar to ATPDIL1-3 (PDI-LIKE 1-3), thiol-disulfide exchange intermediate [Arabidopsis thaliana] (TAIR:AT3G54960.1); similar to protein disulfide isomerase precursor [Oldenlandia affinis] (GB:ABS11216.1…	Law et al., 2012
AT5G60730	247612_at	anion-transporting ATPase family protein	Law et al., 2012
AT5G60870	247598_at	regulator of chromosome condensation (RCC1) family protein	Law et al., 2012
AT5G60960	247607_at	pentatricopeptide (PPR) repeat-containing protein	Law et al., 2012
AT5G61030	247575_at	GR-RBP3 (glycine-rich RNA-binding protein 3); RNA binding encodes a glycine-rich RNA binding protein. Gene expression is induced by cold. similar to GR-RBP5 (glycine-rich RNA-binding protein 5), RNA binding [Arabidopsis thaliana] (TAIR:AT1G74230.1); similar to unnamed protein product [Vitis vinifera] (GB:CAO64431.1); similar to hypothetical protein [Vitis vinifera] (GB:CAN71872.1); contains Inter…	Law et al., 2012
AT5G61310	247520_at		Law et al., 2012
AT5G61370	247550_at	pentatricopeptide (PPR) repeat-containing protein	Law et al., 2012
AT5G61400	247548_at	pentatricopeptide (PPR) repeat-containing protein	Law et al., 2012
AT5G61580	247534_at	PFK4 (PHOSPHOFRUCTOKINASE 4); 6-phosphofructokinase	Law et al., 2012
AT5G61790	247494_at	calnexin 1 (CNX1) Identical to Calnexin homolog 1 precursor (CNX1) [Arabidopsis Thaliana] (GB:P29402); similar to calnexin, putative [Arabidopsis thaliana] (TAIR:AT5G07340.1); similar to calnexin [Glycine max] (GB:BAD81043.1); similar to putative papillar cell-specific calnexin [Brassica napus] (GB:AAK84429.1); similar to Calnexin homolog precursor (GB:Q39817); contains InterPro domain Calreticul…	Law et al., 2012
AT5G61800	247518_at	pentatricopeptide (PPR) repeat-containing protein	Law et al., 2012
AT5G61810	247498_at	Mitochondrial substrate carrier family protein; FUNCTIONS IN: binding, calcium ion binding; INVOLVED IN: transport, transmembrane transport; LOCATED IN: mitochondrial inner membrane, membrane; EXPRESSED IN: 23 plant structures; EXPRESSED DURING: 14 growth stages; CONTAINS InterPro DOMAIN/s: EF-Hand 1, calcium-binding site (InterPro:IPR018247), Mitochondrial substrate carrier (InterPro:IPR001993),…	Law et al., 2012
AT5G61880	247491_at	signaling molecule-related	Law et al., 2012
AT5G61990	247504_at	pentatricopeptide (PPR) repeat-containing protein	Law et al., 2012
AT5G62050	247460_at	OXA1 (Oxidase assembly 1); P-P-bond-hydrolysis-driven protein transmembrane transporter	Law et al., 2012
AT5G62480	247435_at	ATGSTU9 (GLUTATHIONE S-TRANSFERASE TAU 9); glutathione transferase	Law et al., 2012
AT5G62530	247436_at	ALDH12A1 (Aldehyde dehydrogenase 12A1); 1-pyrroline-5-carboxylate dehydrogenase/ 3-chloroallyl aldehyde dehydrogenase Encodes mitochondrial Delta-pyrroline-5- carboxylate dehydrogenase. Involved in the catabolism of proline to glutamate. Involved in protection from proline toxicity. Induced at pathogen infection sites. P5CDH and SRO5 (an overlapping gene in the sense orientation) generate 24-nt a…	Law et al., 2012
AT5G62575	247434_at		Law et al., 2012
AT5G63400	247382_at	ADK1 (ADENYLATE KINASE 1); adenylate kinase encodes a protein similar to adenylate kinase. Identical to Adenylate kinase 1 (ADK1) [Arabidopsis Thaliana] (GB:O82514;GB:Q9FMW2); similar to adenylate kinase, putative [Arabidopsis thaliana] (TAIR:AT5G50370.1); similar to Os11g0312400 [Oryza sativa (japonica cultivar-group)] (GB:NP_001067759.1); similar to unknown [Populus trichocarpa] (GB:ABK93572.1)…	Law et al., 2012
AT5G63510	247330_at		Law et al., 2012
AT5G63570	247392_at	GSA1 (GLUTAMATE-1-SEMIALDEHYDE-2,1-AMINOMUTASE); glutamate-1-semialdehyde 2,1-aminomutase	Law et al., 2012
AT5G63680	247338_at	pyruvate kinase, putative	Law et al., 2012
AT5G64050	247319_at	ATERS/ERS/OVA3 (OVULE ABORTION 3); glutamate-tRNA ligase Glutamate-tRNA ligase. Targeted to mitochondria and chloroplast. Its inactivation causes developmental arrest of chloroplasts and mitochondria in Nicotiana benthamiana. Identical to Glutamyl-tRNA synthetase [Arabidopsis Thaliana] (GB:Q9FEA2;GB:Q940P6); similar to glutamate-tRNA ligase, putative / glutamyl-tRNA synthetase, putatuve / GluRS, …	Law et al., 2012
AT5G64210	247269_at	AOX2 (alternative oxidase 2); alternative oxidase	Law et al., 2012
AT5G64240	247282_at	ATMC3 (METACASPASE 3); caspase similar to LOL3 (LSD ONE LIKE 3), caspase/ cysteine-type endopeptidase [Arabidopsis thaliana] (TAIR:AT1G02170.1); similar to ICE-like protease p20 domain containing protein, expressed [Oryza sativa (japonica cultivar-group)] (GB:ABG66264.1); contains InterPro domain Peptidase C14, caspase catalytic; (InterPro:IPR011600)	Law et al., 2012
AT5G64400	247285_at	similar to unknown protein [Arabidopsis thaliana] (TAIR:AT5G09570.1); similar to unknown [Populus trichocarpa] (GB:ABK94558.1); contains InterPro domain CHCH (InterPro:IPR010625)	Law et al., 2012
AT5G64650	247247_at	ribosomal protein L17 family protein similar to ribosomal protein L17 family protein [Arabidopsis thaliana] (TAIR:AT5G09770.1); similar to unnamed protein product [Vitis vinifera] (GB:CAO46445.1); contains InterPro domain Ribosomal protein L17; (InterPro:IPR000456)	Law et al., 2012
AT5G64670	247249_at	50S ribosomal protein L15	Law et al., 2012
AT5G64970	247233_at	Mitochondrial substrate carrier family protein; FUNCTIONS IN: binding, transporter activity; INVOLVED IN: transport, mitochondrial transport, transmembrane transport; LOCATED IN: mitochondrion, mitochondrial inner membrane, plastid; EXPRESSED IN: 24 plant structures; EXPRESSED DURING: 13 growth stages; CONTAINS InterPro DOMAIN/s: Mitochondrial carrier protein (InterPro:IPR002067), Mitochondrial s…	Law et al., 2012
AT5G64990	247204_at	AtRABH1a (Arabidopsis Rab GTPase homolog H1a); GTP binding similar to AtRABH1e (Arabidopsis Rab GTPase homolog H1e), GTP binding [Arabidopsis thaliana] (TAIR:AT5G10260.1); similar to unnamed protein product [Vitis vinifera] (GB:CAO66868.1); contains InterPro domain Ras GTPase; (InterPro:IPR001806); contains InterPro domain Ras (InterPro:IPR013753); contains InterPro domain Small GTP-binding prote…	Law et al., 2012
AT5G65165	257742_at		Law et al., 2012
AT5G65450	247184_at	ubiquitin carboxyl-terminal hydrolase family protein / zinc finger (MYND type) family protein Identical to Ubiquitin carboxyl-terminal hydrolase 17 (UBP17) [Arabidopsis Thaliana] (GB:Q9FKP5); similar to UBP16 (UBIQUITIN-SPECIFIC PROTEASE 16), ubiquitin-specific protease [Arabidopsis thaliana] (TAIR:AT4G24560.1); similar to unnamed protein product [Vitis vinifera] (GB:CAO22677.1); contains InterPr…	Law et al., 2012
AT5G65560	247141_at	pentatricopeptide (PPR) repeat-containing protein	Law et al., 2012
AT5G65720	247164_at	ATNFS1/ATNIFS1/NFS1/NIFS1 (ARABIOPSIS THALIANA NITROGEN FIXATION S HOMOLOG 1); cysteine desulfurase/ transaminase cysteine desulfurase whose activity is dependent on AtSufE activation. Identical to Cysteine desulfurase 1, mitochondrial precursor (NIFS) [Arabidopsis Thaliana] (GB:O49543); similar to ATCPNIFS/ATNFS2/ATSUFS/CPNIFS/SUFS (CHLOROPLASTIC NIFS-LIKE CYSTEINE DESULFURASE), cysteine desulfu…	Law et al., 2012
AT5G65750	247155_at	2-oxoglutarate dehydrogenase E1 component, putative / oxoglutarate decarboxylase, putative / alpha-ketoglutaric dehydrogenase, putative | chr5:26303693-26308189 FORWARD	Law et al., 2012
AT5G65780	247158_at	ATBCAT-5; branched-chain-amino-acid transaminase/ catalytic encodes a chloroplast branched-chain amino acid aminotransferase, can complement the yeast leu/iso-leu/val auxotrophy mutant Identical to Branched-chain-amino-acid aminotransferase 5, chloroplast precursor (BCAT5) [Arabidopsis Thaliana] (GB:Q9FYA6;GB:O49539;GB:Q9FLG9); similar to ATBCAT-3/BCAT3 (BRANCHED-CHAIN AMINOTRANSFERASE 3) [Arabid…	Law et al., 2012
AT5G65850	247167_at	F-box family protein Identical to F-box protein At5g65850 [Arabidopsis Thaliana] (GB:Q9FHP3;GB:O49533); similar to F-box family protein [Arabidopsis thaliana] (TAIR:AT2G31470.1); similar to hypothetical protein [Vitis vinifera] (GB:CAN60954.1); contains InterPro domain F-box associated type 3 (InterPro:IPR013187); contains InterPro domain Cyclin-like F-box (InterPro:IPR001810); contains InterPro …	Law et al., 2012
AT5G66380	247092_at	ATFOLT1 (ARABIDOPSIS THALIANA FOLATE TRANSPORTER 1); binding / folic acid transporter	Law et al., 2012
AT5G66500	247099_at	pentatricopeptide (PPR) repeat-containing protein	Law et al., 2012
AT5G66510	247076_at		Law et al., 2012
AT5G66760	247060_at	SDH1-1 (Succinate dehydrogenase 1-1)	Law et al., 2012
AT5G66960	247015_at	prolyl oligopeptidase family protein similar to prolyl oligopeptidase family protein [Arabidopsis thaliana] (TAIR:AT1G69020.1); similar to hypothetical protein OsI_030582 [Oryza sativa (indica cultivar-group)] (GB:EAZ09350.1); similar to unnamed protein product [Vitis vinifera] (GB:CAO45322.1); similar to putative oligopeptidase [Oryza sativa (japonica cultivar-group)] (GB:BAD38028.1); contains I…	Law et al., 2012
AT5G67220	247042_at	nitrogen regulation family protein similar to FAD binding / catalytic/ tRNA dihydrouridine synthase [Arabidopsis thaliana] (TAIR:AT3G49640.1); similar to unnamed protein product [Vitis vinifera] (GB:CAO71905.1); contains InterPro domain Dihydrouridine synthase, DuS; (InterPro:IPR001269); contains InterPro domain Aldolase-type TIM barrel; (InterPro:IPR013785)	Law et al., 2012
AT5G67230	247031_at	glycosyl transferase family 43 protein similar to IRX14 (IRREGULAR XYLEM 14), transferase, transferring glycosyl groups / xylosyltransferase [Arabidopsis thaliana] (TAIR:AT4G36890.1); similar to unnamed protein product [Vitis vinifera] (GB:CAO71907.1); contains InterPro domain Glycosyl transferase, family 43; (InterPro:IPR005027)	Law et al., 2012
AT5G67500	247007_at	porin, putative	Law et al., 2012
AT5G67590	247011_at		Law et al., 2012
ATmG00040	257339_s_at	H+-transporting two-sector ATPase, C subunit family protein	Law et al., 2012
ATMG00060	257337_at		Law et al., 2012
ATMG00070	244943_at		Law et al., 2012
ATMG00080	244944_s_at	50S ribosomal protein L16	Law et al., 2012
ATmG00110	244945_at	CCB206 | Encodes a mitochondria-encoded cytochrome c biogenesis protein.	Law et al., 2012
ATmG00160	244950_at	cytochrome c oxidase subunit 2	Law et al., 2012
ATMG00210	266044_s_at	50S ribosomal protein L5	Law et al., 2012
ATmG00220	266045_s_at	Mitochondrial apocytochrome b (cob) gene encodes a subunit of the ubiquinol-cytochrome c oxidoreductase and is part of a 5 kb transcript	Law et al., 2012
ATMG00270	244953_s_at		Law et al., 2012
ATMG00290	266042_s_at	30S ribosomal protein S4	Law et al., 2012
ATmG00410	266012_s_at	ATPase subunit 6	Law et al., 2012
ATmG00480	265230_s_at	Encodes subunit 8 of the mitochondrial F(O) ATP synthase complex.	Law et al., 2012
ATMG00510	244925_at		Law et al., 2012
ATMG00513	257338_s_at		Law et al., 2012
ATMG00560	265232_s_at	50S ribosomal protein L2	Law et al., 2012
ATMG00580	244929_at		Law et al., 2012
ATmG00640	244901_at	encodes a plant b subunit of mitochondrial ATP synthase based on structural similarity and the presence in the F(0) complex.	Law et al., 2012
ATMG00650	244902_at		Law et al., 2012
ATmG00730	263509_s_at	Encodes cytochrome c oxidase subunit 3	Law et al., 2012
ATmG00900	263510_s_at	CCB256 | cytochrome c biogenesis orf256	Law et al., 2012
ATMG00980	263502_s_at	30S ribosomal protein S12	Law et al., 2012
ATMG00990	244920_s_at		Law et al., 2012
ATmG01190	265228_s_at	ATP synthase alpha chain 1, mitochondrial, putative	Law et al., 2012
ATMG01270	265238_s_at	30S ribosomal protein S7	Law et al., 2012
ATmG01280	265227_s_at	encodes a cytochrome c oxidase subunit II	Law et al., 2012
ATmG01360	257333_at	cytochrome c oxidase subunit 1	Law et al., 2012

## Sheet: Peroxisome
AT1G01710	acyl-CoA thioesterase family protein similar to acyl-CoA thioesterase family protein [Arabidopsis thaliana] (TAIR:AT4G00520.2); similar to unnamed protein product [Vitis vinifera] (GB:CAO39602.1); contains InterPro domain RmlC-like jelly roll fold (InterPro:IPR014710); contains InterPro domain Acyl-CoA thioesterase; (InterPro:IPR003703); contains InterPro domain Cyclic nucleotide-binding (InterPr…	Eubel 2008, Reumann 2009, prediction 2+		Peroxisome protein sources:
At1g01820	PEX11C member of the peroxin11 (PEX11) gene family, integral to peroxisome membrane, controls peroxisome proliferation. similar to PEX11D [Arabidopsis thaliana] (TAIR:AT2G45740.1); similar to PEX11D [Arabidopsis thaliana] (TAIR:AT2G45740.2); similar to PEX11D [Arabidopsis thaliana] (TAIR:AT2G45740.3); similar to unknown [Populus trichocarpa x Populus deltoides] (GB:ABK96573.1); contains InterPro …	Eubel 2008, Reumann 2009, peroxisome 2010		Eubel et al., 2008
At1g03000	PEX6 (PEROXIN6); ATPase Encodes an apparent ATPase similar to yeast and human protein required for peroxisomal biogenesis. May facilitate recycling of PEX5, the peroxisomal matrix protein receptor, and thereby promote peroxisomal matrix protein import. similar to cell division cycle protein 48, putative / CDC48, putative [Arabidopsis thaliana] (TAIR:AT3G53230.1); similar to AAA ATPase, central re…	peroxisome 2010		Reumann et al., 2009
AT1G03350	BSD domain-containing protein similar to BSD domain-containing protein [Arabidopsis thaliana] (TAIR:AT4G13110.1); similar to unnamed protein product [Vitis vinifera] (GB:CAO22467.1); contains InterPro domain BSD (InterPro:IPR005607)	prediction 2+		Lingner et al., 2011
AT1G04050	SUVR1 (Arabidopsis homolog of SU(VAR)3-9 1); histone-lysine N-methyltransferase/ zinc ion binding Encodes SUVR1, one of the four closely related Arabidopsis SUVR proteins that belong to the SU(VAR)3-9 subgroup of SET-domain proteins. Proteins containing the evolutionarily conserved SET domain are involved in regulation of eukaryotic gene expression and chromatin structure through their histone ly…	prediction 2+		Peroxisomes 2010 Reumann lab database
At1g04290	thioesterase family protein similar to thioesterase family protein [Arabidopsis thaliana] (TAIR:AT2G29590.1); similar to At1g04290-like protein [Arabidopsis lyrata] (GB:ABY67535.1); contains InterPro domain Phenylacetic acid degradation-related protein (InterPro:IPR003736); contains InterPro domain Thioesterase superfamily (InterPro:IPR006683)	Eubel 2008		SUBA predictors (2 or more peroxisomal predictions)
At1g04710	acetyl-CoA C-acyltransferase, putative / 3-ketoacyl-CoA thiolase, putative Identical to 3-ketoacyl-CoA thiolase 1, peroxisomal precursor (KAT1) [Arabidopsis Thaliana] (GB:Q8LF48;GB:O23014;GB:Q8LPI4); similar to KAT2/PED1 (PEROXISOME DEFECTIVE 1), acetyl-CoA C-acyltransferase [Arabidopsis thaliana] (TAIR:AT2G33150.1); similar to 3-ketoacyl-CoA thiolase; acetyl-CoA acyltransferase [Cucumis sativus]…	Eubel 2008, Reumann 2009, peroxisome 2010
At1g06290	ACX3 (ACYL-COA OXIDASE 3); acyl-CoA oxidase Encodes an acyl-CoA oxidase with specificity for medium chain fatty acids. Identical to Acyl-coenzyme A oxidase 3, peroxisomal precursor (ACX3) [Arabidopsis Thaliana] (GB:Q9LLH9;GB:Q9C839;GB:Q9LKX5;GB:Q9LMI8;GB:Q9M7X6); similar to ACX6 (ACYL-COA OXIDASE 6), acyl-CoA oxidase [Arabidopsis thaliana] (TAIR:AT1G06310.1); similar to hypothetical protein OsI_0…	Eubel 2008, Reumann 2009, peroxisome 2010
At1g06310	ACX6 (ACYL-COA OXIDASE 6); acyl-CoA oxidase Encodes a putative acyl-CoA oxidase. However, no transcripts have been detected for this gene and no altered phenotypes have been detected in plants mutant for this gene. This suggests that ACX6 does not significantly contribute to seedling beta-oxidation of fatty acids or indole-3-butyric acid in vivo. Identical to Putative acyl-coenzyme A oxidase 3.2,…	peroxisome 2010
AT1G06420	unknown protein	prediction 2+
At1g06460	ACD32.1 (ALPHA-CRYSTALLIN DOMAIN 31.2) ACD32.1 encodes an alpha-crystallin domain containing protein with homology to small heat shock proteins. similar to AT-HSP17.6A (Arabidopsis thaliana heat shock protein 17.6A) [Arabidopsis thaliana] (TAIR:AT5G12030.1); similar to peroxisomal small heat shock protein ACD31.2 [Brassica rapa] (GB:ABV89635.1); contains InterPro domain HSP20-like chaperone (Inte…	Reumann 2009, peroxisome 2010
AT1G09700	HYL1 (HYPONASTIC LEAVES 1) Encodes a nuclear dsRNA binding protein. Involved in mRNA cleavage. The mutant is characterized by shorter stature, delayed flowering, leaf hyponasty, reduced fertility, decreased rate of root growth, and an altered root gravitropic response. It also exhibits less sensitivity to auxin and cytokinin. similar to DRB3 (DSRNA-BINDING PROTEIN 3), double-stranded RNA binding …	prediction 2+
At1g11840	ATGLX1 (GLYOXALASE I HOMOLOG); lactoylglutathione lyase Encodes a glyoxalase I homolog ATGLX1. similar to lactoylglutathione lyase, putative / glyoxalase I, putative [Arabidopsis thaliana] (TAIR:AT1G67280.1); similar to putative lactoylglutathione lyase [Brassica rapa] (GB:BAF81517.1); contains InterPro domain Glyoxalase/bleomycin resistance protein/dioxygenase (InterPro:IPR004360); contains Inte…	peroxisome 2010
AT1G12520	CCS1 (copper chaperone for superoxide dismutase 1); superoxide dismutase copper chaperone Copper/zinc superoxide dismutase copper chaperone. Localized to the chloroplast. Expressed in roots and shoots. Up-regulated in response to copper and senescence. The AtACC activates all three CuZnSOD activities located in three different subcellular compartments. Contains three domains, central, ATX-1 like …	prediction 2+
AT1G12780	UGE1 (UDP-D-GLUCOSE/UDP-D-GALACTOSE 4-EPIMERASE 1); UDP-glucose 4-epimerase/ protein dimerization Encodes a UDP-glucose epimerase that catalyzes the interconversion of the sugar nucleotides UDP-glucose UDP-galactose via a UDP-4-keto-hexose intermediate. Responsive to stress. Identical to UDP-glucose 4-epimerase [Arabidopsis Thaliana] (GB:Q42605;GB:Q9LPX1); similar to UGE3 (UDP-D-GLUCOSE/UDP-D-GAL…	prediction 2+
AT1G13200	F-box family protein Identical to Putative F-box/Kelch-repeat protein At1g13200 [Arabidopsis Thaliana] (GB:Q9SAF4); similar to basic helix-loop-helix (bHLH) family protein / F-box family protein [Arabidopsis thaliana] (TAIR:AT1G12860.1); similar to predicted F-box and bHLH containing protein [Overexpression vector pFC12860OE] (GB:ABK41847.1); contains InterPro domain Cyclin-like F-box (InterPro:I…	prediction 2+
AT1G13440	GAPC-2; glyceraldehyde-3-phosphate dehydrogenase Identical to Glyceraldehyde-3-phosphate dehydrogenase, cytosolic (GAPC) [Arabidopsis Thaliana] (GB:P25858;GB:Q42352;GB:Q9M8W8); similar to GAPC (GLYCERALDEHYDE-3-PHOSPHATE DEHYDROGENASE C SUBUNIT), glyceraldehyde-3-phosphate dehydrogenase [Arabidopsis thaliana] (TAIR:AT3G04120.1); similar to Glyceraldehyde-3-phosphate dehydrogenase, cytosolic (GB:P…	prediction 2+
AT1G13640	phosphatidylinositol 3- and 4-kinase family protein similar to phosphatidylinositol 3- and 4-kinase family protein [Arabidopsis thaliana] (TAIR:AT2G03890.1); similar to phosphatidylinositol 3- and 4-kinase family protein [Arabidopsis thaliana] (TAIR:AT1G26270.1); similar to unnamed protein product [Vitis vinifera] (GB:CAO67941.1); similar to Phosphatidylinositol 3- and 4-kinase, catalytic [Medica…	prediction 2+
AT1G13650	similar to 18S pre-ribosomal assembly protein gar2-related [Arabidopsis thaliana] (TAIR:AT2G03810.4); similar to 18S pre-ribosomal assembly protein gar2-related [Arabidopsis thaliana] (TAIR:AT2G03810.2); similar to 18S pre-ribosomal assembly protein gar2-related [Arabidopsis thaliana] (TAIR:AT2G03810.3); similar to hypothetical protein Tc00.1047053503999.40 [Trypanosoma cruzi strain CL Brener] (G…	prediction 2+
AT1G14930	major latex protein-related / MLP-related similar to major latex protein-related / MLP-related [Arabidopsis thaliana] (TAIR:AT1G14940.1); similar to major latex protein homologue [Datisca glomerata] (GB:CAD33533.1); contains InterPro domain Bet v I allergen; (InterPro:IPR000916)	prediction 2+
AT1G14940	major latex protein-related / MLP-related similar to major latex protein-related / MLP-related [Arabidopsis thaliana] (TAIR:AT1G14930.1); similar to major latex protein [Ficus awkeotsang] (GB:AAQ07269.1); contains InterPro domain Bet v I allergen; (InterPro:IPR000916)	prediction 2+
AT1G14950	major latex protein-related / MLP-related similar to major latex protein-related / MLP-related [Arabidopsis thaliana] (TAIR:AT1G14930.1); similar to major latex protein [Ficus awkeotsang] (GB:AAQ07269.1); contains InterPro domain Bet v I allergen; (InterPro:IPR000916)	prediction 2+
AT1G16730	similar to unknown [Picea sitchensis] (GB:ABK21208.1)	peroxisomes 2010, prediction 2+
At1g19570	DHAR1 (DEHYDROASCORBATE REDUCTASE); glutathione dehydrogenase (ascorbate) similar to DHAR2, glutathione dehydrogenase (ascorbate) [Arabidopsis thaliana] (TAIR:AT1G75270.1); similar to unknown [Populus trichocarpa] (GB:ABK93121.1); contains InterPro domain Thioredoxin-like fold (InterPro:IPR012336); contains InterPro domain Glutathione S-transferase, C-terminal-like (InterPro:IPR010987); contains …	Reumann 2009 GFP, peroxisome 2010
At1g20480	4-coumarate--CoA ligase family protein / 4-coumaroyl-CoA synthase family protein Identical to 4-coumarate--CoA ligase-like 2 (4CLL2) [Arabidopsis Thaliana] (GB:Q84P25;GB:Q9LMV7); similar to OPCL1 (OPC-8:0 COA LIGASE1), 4-coumarate-CoA ligase [Arabidopsis thaliana] (TAIR:AT1G20510.1); similar to hypothetical protein [Vitis vinifera] (GB:CAN74074.1); similar to unnamed protein product [Vitis vinife…	Eubel 2008
At1g20510	OPCL1 (OPC-8:0 COA LIGASE1); 4-coumarate-CoA ligase Identical to 4-coumarate--CoA ligase-like 5 (4CLL5) [Arabidopsis Thaliana] (GB:Q84P21;GB:Q9C5H2;GB:Q9LMV8); similar to 4-coumarate--CoA ligase family protein / 4-coumaroyl-CoA synthase family protein [Arabidopsis thaliana] (TAIR:AT1G20480.1); similar to 4-coumarate--CoA ligase family protein / 4-coumaroyl-CoA synthase family protein [Arabidopsis…	Eubel 2008, Reumann 2009
AT1G20560	AMP-dependent synthetase and ligase family protein similar to AMP-dependent synthetase and ligase family protein [Arabidopsis thaliana] (TAIR:AT2G17650.1); similar to Putative AMP-binding protein [Oryza sativa (japonica cultivar-group)] (GB:AAN05508.1); similar to hypothetical protein OsI_005461 [Oryza sativa (indica cultivar-group)] (GB:EAY84228.1); similar to Os03g0133500 [Oryza sativa (japonic…	Eubel 2008, Reumann 2009, peroxisome 2010, prediction 2+
AT1G20620	CAT3 (CATALASE 3); catalase Catalase, catalyzes the breakdown of hydrogen peroxide (H2O2) into water and oxygen. Identical to Catalase-3 (CAT3) [Arabidopsis Thaliana] (GB:Q42547;GB:Q93VY9;GB:Q9LDS9); similar to CAT1 (CATALASE 1), catalase [Arabidopsis thaliana] (TAIR:AT1G20630.1); similar to CAT2 (CATALASE 2), catalase [Arabidopsis thaliana] (TAIR:AT4G35090.2); similar to CAT2 (CATALASE 2), catal…	Eubel 2008, Reumann 2009, peroxisome 2010, prediction 2+
At1g20630	CAT1 (CATALASE 1); catalase Catalyzes the reduction of hydrogen peroxide using heme group as cofactor. Protects cells from toxicity by H2O2. Identical to Catalase-1 (CAT1) [Arabidopsis Thaliana] (GB:Q96528;GB:O22529;GB:Q9LDS9); similar to CAT2 (CATALASE 2), catalase [Arabidopsis thaliana] (TAIR:AT4G35090.2); similar to CAT2 (CATALASE 2), catalase [Arabidopsis thaliana] (TAIR:AT4G35090.1); similar…	Eubel 2008, Reumann 2009, peroxisome 2010
At1g21770	similar to unknown protein [Arabidopsis thaliana] (TAIR:AT1G77540.1); similar to unnamed protein product [Vitis vinifera] (GB:CAO61877.1); contains InterPro domain Acyl-CoA N-acyltransferase (InterPro:IPR016181)	Reumann 2009 GFP, peroxisome 2010
AT1G23310	GGT1 (ALANINE-2-OXOGLUTARATE AMINOTRANSFERASE 1) Identified by cloning the gene that corresponded to a purified protein having glyoxylate aminotransferase activity. Localized to the peroxisome and thought to be involved in photorespiration/ metabolic salvage pathway. similar to AOAT2 (GLUTAMATE:GLYOXYLATE AMINOTRANSFERASE 2), alanine transaminase [Arabidopsis thaliana] (TAIR:AT1G70580.2); similar…	Eubel 2008, Reumann 2009, peroxisome 2010, prediction 2+
AT1G27340	F-box family protein Identical to F-box only protein 6 (FBX6) [Arabidopsis Thaliana] (GB:Q9FZK1;GB:Q8LEE1); similar to F-box family protein [Arabidopsis thaliana] (TAIR:AT5G15710.1); similar to unnamed protein product [Vitis vinifera] (GB:CAO66155.1); contains InterPro domain Cyclin-like F-box (InterPro:IPR001810); contains InterPro domain Galactose oxidase/kelch, beta-propeller (InterPro:IPR0110…	prediction 2+
AT1G28320	DEG15; endopeptidase Mutants in this gene are defective in the processing of pre-glyoxysomal malate dehydrogenase (pre-gMDH) to gMDH. similar to DEGP1 (DEGP PROTEASE 1), serine-type peptidase [Arabidopsis thaliana] (TAIR:AT3G27925.1); similar to putative protease/hydrolase [Lycopersicon esculentum] (GB:ABH07902.1); similar to unnamed protein product [Vitis vinifera] (GB:CAO66416.1); contains Inte…	Eubel 2008, peroxisome 2010, prediction 2+
At1g29260	PEX7 (peroxin 7) Encodes the peroxisomal targeting signal type 2 receptor that facilitates peroxisomal protein translocation. It recognizes proteins with the PTS2 consensus sequence (RLX5HL or a variant) within the first 30 or so amino acids. RNAi experiments suggest that PEX7 is necessary for the maintenance of glyoxysomal but not leaf peroxisomal function. similar to MSI1 (MULTICOPY SUPRESSOR O…	Eubel 2008, peroxisome 2010
AT1G30230	elongation factor 1-beta / EF-1-beta Identical to Elongation factor 1-delta 1 [Arabidopsis Thaliana] (GB:P48006;GB:Q0WWW7); similar to elongation factor 1-beta, putative / EF-1-beta, putative [Arabidopsis thaliana] (TAIR:AT2G18110.1); similar to putative elongation factor 1-beta [Brassica rapa] (GB:ABK78691.1); contains InterPro domain Translation elongation factor EF1B, beta/delta chains, conser…	prediction 2+
AT1G32300	FAD-binding domain-containing protein similar to FAD-binding domain-containing protein [Arabidopsis thaliana] (TAIR:AT2G46750.1); similar to FAD-binding domain-containing protein [Arabidopsis thaliana] (TAIR:AT2G46760.1); similar to FAD-binding domain-containing protein [Arabidopsis thaliana] (TAIR:AT5G56490.1); similar to unnamed protein product [Vitis vinifera] (GB:CAO24313.1); contains InterPr…	prediction 2+
AT1G33590	disease resistance protein-related / LRR protein-related similar to leucine-rich repeat family protein [Arabidopsis thaliana] (TAIR:AT1G33600.1); similar to disease resistance protein-related / LRR protein-related [Arabidopsis thaliana] (TAIR:AT2G26380.1); similar to unnamed protein product [Vitis vinifera] (GB:CAO44580.1); contains InterPro domain Leucine-rich repeat, N-terminal (InterPro:IPR013…	prediction 2+
AT1G33610	leucine-rich repeat family protein similar to disease resistance protein-related / LRR protein-related [Arabidopsis thaliana] (TAIR:AT1G33590.1); similar to unnamed protein product [Vitis vinifera] (GB:CAO44580.1); contains InterPro domain Leucine-rich repeat, N-terminal (InterPro:IPR013210); contains InterPro domain Leucine-rich repeat; (InterPro:IPR001611); contains InterPro domain Leucine-rich…	prediction 2+
AT1G33670	leucine-rich repeat family protein similar to disease resistance protein-related / LRR protein-related [Arabidopsis thaliana] (TAIR:AT1G33590.1); similar to unnamed protein product [Vitis vinifera] (GB:CAO44580.1); contains InterPro domain Leucine-rich repeat, N-terminal (InterPro:IPR013210); contains InterPro domain Leucine-rich repeat; (InterPro:IPR001611)	prediction 2+
At1g34350	similar to unnamed protein product [Vitis vinifera] (GB:CAO46981.1); contains domain PTHR22593 (PTHR22593); contains domain PTHR22593:SF2 (PTHR22593:SF2)	Eubel 2008
At1g35720	ANNAT1 (ANNEXIN ARABIDOPSIS 1); calcium ion binding / calcium-dependent phospholipid binding Encodes a member of the annexin gene family, a diverse, multigene family of calcium-dependent, membrane-binding proteins. The protein was determined to have peroxidase activity. This activity is thought to be dependent on the presence of post-translational modifications (most likely phosphorylation). The …	Eubel 2008
At1g36580	2,4-dienoyl-CoA reductase-related similar to short-chain dehydrogenase/reductase (SDR) family protein [Arabidopsis thaliana] (TAIR:AT3G12800.1); similar to unnamed protein product [Vitis vinifera] (GB:CAO64912.1); contains InterPro domain Short-chain dehydrogenase/reductase SDR; (InterPro:IPR002198); contains InterPro domain NAD(P)-binding; (InterPro:IPR016040)	Eubel 2008
At1g43770	PHD finger family protein similar to predicted protein [Physcomitrella patens subsp. patens] (GB:EDQ57269.1); contains InterPro domain Zinc finger, PHD-type; (InterPro:IPR001965); contains InterPro domain Zinc finger, FYVE/PHD-type; (InterPro:IPR011011)	Lingner 2011
At1g47750	PEX11A member of the peroxin11 (PEX11) gene family, integral to peroxisome membrane, controls peroxisome proliferation. similar to PEX11B [Arabidopsis thaliana] (TAIR:AT3G47430.1); similar to unnamed protein product [Vitis vinifera] (GB:CAO61205.1); contains InterPro domain Peroxisomal biogenesis factor 11; (InterPro:IPR008733)	Eubel 2008, Reumann 2009, peroxisome 2010
AT1G48320	thioesterase family protein similar to thioesterase family protein [Arabidopsis thaliana] (TAIR:AT5G48950.1); similar to unnamed protein product [Vitis vinifera] (GB:CAO70944.1); contains InterPro domain Phenylacetic acid degradation-related protein (InterPro:IPR003736); contains InterPro domain Thioesterase superfamily (InterPro:IPR006683)	Reumann 2009 GFP, prediction 2+
At1g48635	PEX3/PEX3-2 (PEROXIN 3-2) similar to PEX3-1 (PEROXIN 3-1) [Arabidopsis thaliana] (TAIR:AT3G18160.1); similar to unnamed protein product [Vitis vinifera] (GB:CAO68158.1); contains InterPro domain Peroxin-3; (InterPro:IPR006966)	peroxisome 2010
At1g49350	pfkB-type carbohydrate kinase family protein similar to Carbohydrate kinase, PfkB [Medicago truncatula] (GB:ABC75360.1); contains InterPro domain Carbohydrate/purine kinase (InterPro:IPR011611); contains InterPro domain Carbohydrate/puine kinase, PfkB, conserved site (InterPro:IPR002173); contains InterPro domain Ribokinase; (InterPro:IPR002139)	Eubel 2008, Lingner 2011
AT1G49670	ARP protein (REF) similar to oxidoreductase, zinc-binding dehydrogenase family protein [Arabidopsis thaliana] (TAIR:AT3G56460.1); similar to hypothetical protein OsI_030620 [Oryza sativa (indica cultivar-group)] (GB:EAZ09388.1); similar to unnamed protein product [Vitis vinifera] (GB:CAO47793.1); similar to hypothetical protein OsJ_028486 [Oryza sativa (japonica cultivar-group)] (GB:EAZ45003.1); …	prediction 2+
At1g50510	indigoidine synthase A family protein similar to unnamed protein product [Vitis vinifera] (GB:CAO67294.1); contains InterPro domain Indigoidine synthase A like protein (InterPro:IPR007342)	Eubel 2008
At1g51745	Identical to Uncharacterized protein At1g51745 [Arabidopsis Thaliana] (GB:P59278;GB:Q9C8I2); similar to unknown protein [Arabidopsis thaliana] (TAIR:AT3G21295.1); similar to unnamed protein product [Vitis vinifera] (GB:CAO45735.1); contains InterPro domain PWWP (InterPro:IPR000313)	Lingner 2011
AT1G53850	PAE1 (20S proteasome alpha subunit E1); peptidase Encodes alpha5 subunit of 20s proteosome involved in protein degradation. Identical to Proteasome subunit alpha type-5-A (PAE1) [Arabidopsis Thaliana] (GB:O81149;GB:Q56ZL5); similar to PAE2 (20S proteasome alpha subunit E2), peptidase [Arabidopsis thaliana] (TAIR:AT3G14290.1); similar to Proteasome subunit alpha type-5 (20S proteasome alpha subuni…	prediction 2+
AT1G54340	ICDH; isocitrate dehydrogenase (NADP+) NADP-specific isocitrate dehydrogenase (ICDH) similar to isocitrate dehydrogenase, putative / NADP+ isocitrate dehydrogenase, putative [Arabidopsis thaliana] (TAIR:AT5G14590.1); similar to isocitrate dehydrogenase, putative / NADP+ isocitrate dehydrogenase, putative [Arabidopsis thaliana] (TAIR:AT1G65930.1); similar to NADP-isocitrate dehydrogenase [Citrus l…	Eubel 2008, Reumann 2009, peroxisome 2010, prediction 2+
AT1G54640	F-box family protein-related similar to F-box family protein-related [Arabidopsis thaliana] (TAIR:AT1G32600.1); contains InterPro domain F-box associated type 1 (InterPro:IPR006527)	prediction 2+
At1g55320	ligase similar to acyl-activating enzyme 17 (AAE17) [Arabidopsis thaliana] (TAIR:AT5G23050.1); similar to acyl-activating enzyme 18, putative, expressed [Oryza sativa (japonica cultivar-group)] (GB:ABF99434.1); similar to unnamed protein product [Vitis vinifera] (GB:CAO22055.1); similar to unnamed protein product [Vitis vinifera] (GB:CAO22056.1); contains InterPro domain AMP-dependent synthetase …	peroxisome 2010
AT1G60200	splicing factor PWI domain-containing protein / RNA recognition motif (RRM)-containing protein similar to hypothetical protein OsI_028229 [Oryza sativa (indica cultivar-group)] (GB:EAZ06997.1); contains InterPro domain RNA recognition motif, RNP-1; (InterPro:IPR000504); contains InterPro domain Splicing factor PWI; (InterPro:IPR002483); contains InterPro domain Nucleotide-binding, alpha-beta plai…	prediction 2+
At1g60550	naphthoate synthase, putative / dihydroxynaphthoic acid synthetase, putative / DHNA synthetase, putative similar to enoyl-CoA hydratase/isomerase family protein [Arabidopsis thaliana] (TAIR:AT4G16210.1); similar to hypothetical protein [Vitis vinifera] (GB:CAN74179.1); contains InterPro domain Naphthoate synthase; (InterPro:IPR010198); contains InterPro domain Crotonase, core; (InterPro:IPR001753)	Reumann 2009 GFP, peroxisome 2010
AT1G63520	similar to unknown protein [Arabidopsis thaliana] (TAIR:AT4G11450.1); similar to unnamed protein product [Vitis vinifera] (GB:CAO62824.1); contains InterPro domain Tubby, C-terminal (InterPro:IPR000007)	prediction 2+
AT1G65520	enoyl-CoA hydratase/isomerase family protein similar to enoyl-CoA hydratase/isomerase family protein [Arabidopsis thaliana] (TAIR:AT4G14430.1); similar to hypothetical protein [Vitis vinifera] (GB:CAN82361.1); contains InterPro domain Crotonase, core; (InterPro:IPR001753)	Eubel 2008, Reumann 2009, peroxisome 2010, prediction 2+
AT1G65840	ATPAO4 (POLYAMINE OXIDASE 4); amine oxidase similar to ATPAO2 (POLYAMINE OXIDASE 2), amine oxidase [Arabidopsis thaliana] (TAIR:AT2G43020.1); similar to unnamed protein product [Vitis vinifera] (GB:CAO38729.1); similar to OSJNBb0004A17.1 [Oryza sativa (japonica cultivar-group)] (GB:CAE03599.2); similar to Os04g0671300 [Oryza sativa (japonica cultivar-group)] (GB:NP_001054219.1); contains InterPro…	Eubel 2008, peroxisome 2010, prediction 2+
AT1G65880	BZO1; benzoate-CoA ligase Encodes a benzoate-CoA ligase. Involved in the biosynthesis of benzoyloxyglucosinolate in Arabidopsis seeds. similar to acyl-activating enzyme 11 (AAE11) [Arabidopsis thaliana] (TAIR:AT1G66120.1); similar to AMP-dependent synthetase and ligase family protein [Arabidopsis thaliana] (TAIR:AT1G68270.1); similar to acyl-activating enzyme 12 (AAE12) [Arabidopsis thaliana] (TA…	prediction 2+
AT1G65890	acyl-activating enzyme 12 (AAE12) similar to acyl-activating enzyme 11 (AAE11) [Arabidopsis thaliana] (TAIR:AT1G66120.1); similar to AMP-dependent synthetase and ligase family protein [Arabidopsis thaliana] (TAIR:AT1G68270.1); similar to BZO1, benzoate-CoA ligase [Arabidopsis thaliana] (TAIR:AT1G65880.1); similar to unknown [Populus trichocarpa] (GB:ABK95768.1); similar to hypothetical protein Os…	prediction 2+
AT1G66120	acyl-activating enzyme 11 (AAE11) similar to AMP-dependent synthetase and ligase family protein [Arabidopsis thaliana] (TAIR:AT1G68270.1); similar to acyl-activating enzyme 12 (AAE12) [Arabidopsis thaliana] (TAIR:AT1G65890.1); similar to BZO1, benzoate-CoA ligase [Arabidopsis thaliana] (TAIR:AT1G65880.1); similar to unknown [Populus trichocarpa] (GB:ABK95768.1); similar to unnamed protein product…	prediction 2+
AT1G68010	HPR (HYDROXYPYRUVATE REDUCTASE); glycerate dehydrogenase/ poly(U) binding Encodes hydroxypyruvate reductase. similar to PGDH (3-PHOSPHOGLYCERATE DEHYDROGENASE), phosphoglycerate dehydrogenase [Arabidopsis thaliana] (TAIR:AT1G17745.1); similar to EDA9 (embryo sac development arrest 9), NAD binding / amino acid binding / binding / catalytic/ cofactor binding / oxidoreductase, acting on the CH-OH gr…	prediction 2+
AT1G70580	AOAT2 (GLUTAMATE:GLYOXYLATE AMINOTRANSFERASE 2); alanine transaminase Similar to glutamate-glyoxylate transaminase enzyme encoded by AOAT1 similar to GGT1 (ALANINE-2-OXOGLUTARATE AMINOTRANSFERASE 1) [Arabidopsis thaliana] (TAIR:AT1G23310.2); similar to GGT1 (ALANINE-2-OXOGLUTARATE AMINOTRANSFERASE 1) [Arabidopsis thaliana] (TAIR:AT1G23310.1); similar to AlaT1 [Vitis vinifera] (GB:AAZ43369.1); sim…	Eubel 2008, Reumann 2009, peroxisome 2010, prediction 2+
AT1G73390	similar to unknown protein [Arabidopsis thaliana] (TAIR:AT1G17940.1); similar to unknown [Populus trichocarpa] (GB:ABK95976.1); similar to unnamed protein product [Vitis vinifera] (GB:CAO62047.1); contains InterPro domain BRO1 (InterPro:IPR004328)	prediction 2+
At1g76150	maoC-like dehydratase domain-containing protein similar to predicted protein [Physcomitrella patens subsp. patens] (GB:EDQ71903.1); similar to Os09g0544900 [Oryza sativa (japonica cultivar-group)] (GB:NP_001063833.1); contains InterPro domain MaoC-like dehydratase; (InterPro:IPR002539); contains InterPro domain Fatty acid synthase; (InterPro:IPR003965); contains InterPro domain Short-chain dehydr…	Eubel 2008, Reumann 2009, peroxisome 2010
AT1G76870	similar to transcription factor [Arabidopsis thaliana] (TAIR:AT1G21200.1); similar to unnamed protein product [Vitis vinifera] (GB:CAO43641.1)	prediction 2+
At1g77540	Encodes a H3/H4 histone acetyltransferase. Belongs to the GNAT family, whose many members are involved in histone acetylation and chromatin remodeling, and are important for the regulation of cell growth and development. Identical to Uncharacterized protein At1g77540 [Arabidopsis Thaliana] (GB:Q9CAQ2;GB:Q8LEN2); similar to unknown protein [Arabidopsis thaliana] (TAIR:AT1G21770.1); similar to unna…	Reumann 2009 GFP
AT1G78660	ATGGH1; gamma-glutamyl hydrolase The Arabidopsis protein AtGGH1 is a gamma-glutamyl hydrolase cleaving pentaglutamates to yield di- and triglutamates. The enzyme is involved in the tetrahydrofolate metabolism and located to the vacuole. similar to ATGGH2 (GAMMA-GLUTAMYL HYDROLASE 2), gamma-glutamyl hydrolase [Arabidopsis thaliana] (TAIR:AT1G78680.1); similar to unnamed protein product [Vitis vini…	prediction 2+
At1g79810	TED3 (REVERSAL OF THE DET PHENOTYPE); protein binding / zinc ion binding Dominant suppressor of det1 phenotypes. Encodes a peroxisomal protein essential for Arabidopsis growth. Inserted directly from the cytosol into peroxisomes. Identical to Peroxisome assembly protein 2 (PEX2) [Arabidopsis Thaliana] (GB:Q9CA86;GB:Q8LFI7;GB:Q9M9Z9); similar to unnamed protein product [Vitis vinifera] (GB:CAO4586…	peroxisome 2010
At2g01880	ATPAP7/PAP7 (purple acid phosphatase 7); acid phosphatase/ protein serine/threonine phosphatase similar to ATACP5 (acid phosphatase 5), acid phosphatase/ protein serine/threonine phosphatase [Arabidopsis thaliana] (TAIR:AT3G17790.1); similar to purple acid phosphatase 1 [Solanum tuberosum] (GB:AAT37529.1); contains InterPro domain Metallophosphoesterase; (InterPro:IPR004843)	Lingner 2011
At2g02510	similar to unknown protein [Arabidopsis thaliana] (TAIR:AT1G14450.1); similar to unknown [Populus trichocarpa] (GB:ABK94107.1)	peroxisome 2010
AT2G02840	similar to nucleic acid binding / zinc ion binding [Arabidopsis thaliana] (TAIR:AT2G06904.1)	prediction 2+
AT2G06050	OPR3 (OPDA-REDUCTASE 3); 12-oxophytodienoate reductase Encodes a 12-oxophytodienoate reductase that is required for jasmonate biosynthesis. Mutants are male sterile and defective in pollen dehiscence. Identical to 12-oxophytodienoate reductase 3 (OPR3) [Arabidopsis Thaliana] (GB:Q9FUP0;GB:Q9LLD6;GB:Q9SCY4;GB:Q9XHD2;GB:Q9ZQ01); similar to OPR2 (12-oxophytodienoate reductase 2), 12-oxophytodienoate…	Eubel 2008, Reumann 2009, peroxisome 2010, prediction 2+
At2g07640	D2,D4-dienoyl-CoA reductase-related similar to short-chain dehydrogenase/reductase (SDR) family protein [Arabidopsis thaliana] (TAIR:AT3G12800.1); similar to unnamed protein product [Vitis vinifera] (GB:CAO64912.1); contains InterPro domain Short-chain dehydrogenase/reductase SDR; (InterPro:IPR002198); contains InterPro domain Glucose/ribitol dehydrogenase; (InterPro:IPR002347); contains InterPro…	Eubel 2008
AT2G13360	AGT (ALANINE:GLYOXYLATE AMINOTRANSFERASE) Encodes a peroxisomal photorespiratory enzyme that catalyzes transamination reactions with multiple substrates. It is involved in photorespiration. Identical to Serine--glyoxylate aminotransferase (AGT1) [Arabidopsis Thaliana] (GB:Q56YA5;GB:O81248); similar to aminotransferase 1 [Cucumis melo] (GB:AAL47679.1); similar to aminotransferase 1 [Cucumis melo] …	Eubel 2008, Reumann 2009, peroxisome 2010, prediction 2+
At2g14120	dynamin-like protein 2b (ADL2b) Identical to Dynamin-related protein 3B (DRP3B) [Arabidopsis Thaliana] (GB:Q8LFT2;GB:Q8LPH8;GB:Q8S8A4;GB:Q8S943;GB:Q9SI47); similar to ADL2 (ARABIDOPSIS DYNAMIN-LIKE 2), GTP binding / GTPase [Arabidopsis thaliana] (TAIR:AT4G33650.1); similar to hypothetical protein [Vitis vinifera] (GB:CAN69849.1); similar to unnamed protein product [Vitis vinifera] (GB:CAO64742.1)…	peroxisome 2010
AT2G15660	AGL95; transcription factor similar to AGL48, transcription factor [Arabidopsis thaliana] (TAIR:AT2G40210.1); similar to unnamed protein product [Vitis vinifera] (GB:CAO70947.1); contains InterPro domain Transcription factor, MADS-box; (InterPro:IPR002100)	prediction 2+
At2g17420	NTRA (NADPH-dependent thioredoxin reductase 2) NADPH-dependent thioredoxin reductase, major cytosolic isoform Identical to Thioredoxin reductase 2 (NTR2) [Arabidopsis Thaliana] (GB:Q39242;GB:O22751); similar to NTR1 (NADPH-dependent thioredoxin reductase 1) [Arabidopsis thaliana] (TAIR:AT4G35460.1); similar to unnamed protein product [Vitis vinifera] (GB:CAO68513.1); contains InterPro domain Pyri…	Eubel 2008
AT2G18110	elongation factor 1-beta, putative / EF-1-beta, putative Identical to Elongation factor 1-delta 2 [Arabidopsis Thaliana] (GB:Q9SI20;GB:Q7GA96;GB:Q8LB45); similar to elongation factor 1-beta / EF-1-beta [Arabidopsis thaliana] (TAIR:AT1G30230.1); similar to elongation factor 1-beta / EF-1-beta [Arabidopsis thaliana] (TAIR:AT1G30230.2); similar to putative elongation factor 1-beta [Brassica rapa] (G…	prediction 2+
At2g20800	NDB4 (NAD(P)H DEHYDROGENASE B4); NADH dehydrogenase similar to NDB3, NADH dehydrogenase [Arabidopsis thaliana] (TAIR:AT4G21490.1); similar to NDB1 (NAD(P)H DEHYDROGENASE B1), NADH dehydrogenase/ disulfide oxidoreductase [Arabidopsis thaliana] (TAIR:AT4G28220.1); similar to NDB2 (NAD(P)H DEHYDROGENASE B2), disulfide oxidoreductase [Arabidopsis thaliana] (TAIR:AT4G05020.1); similar to hypothetical …	Eubel 2008
AT2G21500	protein binding / zinc ion binding similar to protein binding / zinc ion binding [Arabidopsis thaliana] (TAIR:AT4G39140.5); similar to protein binding / zinc ion binding [Arabidopsis thaliana] (TAIR:AT4G39140.3); similar to protein binding / zinc ion binding [Arabidopsis thaliana] (TAIR:AT4G39140.4); similar to unnamed protein product [Vitis vinifera] (GB:CAO47581.1); contains InterPro domain Zin…	prediction 2+
AT2G21730	mannitol dehydrogenase, putative similar to mannitol dehydrogenase, putative [Arabidopsis thaliana] (TAIR:AT2G21890.1); similar to putative sinapyl alcohol dehydrogenase [Populus tremula x Populus tremuloides] (GB:AAM95578.1); contains InterPro domain Alcohol dehydrogenase GroES-like (InterPro:IPR013154); contains InterPro domain NAD(P)-binding; (InterPro:IPR016040); contains InterPro domain GroE…	prediction 2+
AT2G21810	CHP-rich zinc finger protein, putative similar to DC1 domain-containing protein [Arabidopsis thaliana] (TAIR:AT2G21830.1); similar to DC1 domain containing protein [Nicotiana tabacum] (GB:BAF80452.1); contains InterPro domain C1-like (InterPro:IPR011424)	prediction 2+
AT2G21890	mannitol dehydrogenase, putative similar to mannitol dehydrogenase, putative [Arabidopsis thaliana] (TAIR:AT2G21730.1); similar to putative sinapyl alcohol dehydrogenase [Populus tremula x Populus tremuloides] (GB:AAM95578.1); contains InterPro domain Alcohol dehydrogenase GroES-like (InterPro:IPR013154); contains InterPro domain NAD(P)-binding; (InterPro:IPR016040); contains InterPro domain GroE…	prediction 2+
AT2G22680	zinc finger (C3HC4-type RING finger) family protein similar to EDA40 (embryo sac development arrest 40), protein binding / ubiquitin-protein ligase/ zinc ion binding [Arabidopsis thaliana] (TAIR:AT4G37890.1); similar to EDA40 (embryo sac development arrest 40), protein binding / ubiquitin-protein ligase/ zinc ion binding [Arabidopsis thaliana] (TAIR:AT4G37890.2); similar to zinc finger protein [M…	prediction 2+
At2g22780	PMDH1 (PEROXISOMAL NAD-MALATE DEHYDROGENASE 1); malate dehydrogenase encodes an peroxisomal NAD-malate dehydrogenase that is involved in fatty acid beta-oxidation through providing NAD to the process of converting fatty acyl CoA to acetyl CoA. Identical to Probable malate dehydrogenase, glyoxysomal precursor [Arabidopsis Thaliana] (GB:O82399); similar to PMDH2 (PEROXISOMAL NAD-MALATE DEHYDROGENAS…	Eubel 2008, Reumann 2009
AT2G24260	basic helix-loop-helix (bHLH) family protein similar to basic helix-loop-helix (bHLH) family protein [Arabidopsis thaliana] (TAIR:AT4G30980.1); similar to unnamed protein product [Vitis vinifera] (GB:CAO66689.1); contains InterPro domain Basic helix-loop-helix dimerisation region bHLH; (InterPro:IPR001092); contains InterPro domain Helix-loop-helix DNA-binding; (InterPro:IPR011598)	prediction 2+
At2g24580	sarcosine oxidase family protein Identical to Probable sarcosine oxidase [Arabidopsis Thaliana] (GB:Q9SJA7); similar to unnamed protein product [Vitis vinifera] (GB:CAO63139.1); contains InterPro domain Sarcosine oxidase, monomeric; (InterPro:IPR006281); contains InterPro domain FAD dependent oxidoreductase; (InterPro:IPR006076)	peroxisome 2010
AT2G26230	uricase / urate oxidase / nodulin 35, putative Identical to Uricase [Arabidopsis Thaliana] (GB:O04420;GB:O64848;GB:Q94A71); similar to uricase [Lotus japonicus] (GB:BAB18538.1); contains InterPro domain Uricase; (InterPro:IPR002042)	Eubel 2008, Reumann 2009, peroxisome 2010, prediction 2+
At2g26350	PEX10 (PEROXIN 10); protein binding / zinc ion binding Zinc-binding peroxisomal integral membrane protein (PEX10). Inserted directly from the cytosol into peroxisomes and is involved in importing proteins into the peroxisome. Required for embryogenesis. Identical to Peroxisome assembly protein 10 (PEX10) [Arabidopsis Thaliana] (GB:Q9SYU4;GB:O65895;GB:Q8LBN2;GB:Q8S8Q5;GB:Q9M400); similar to RMA1 (…	peroxisome 2010
AT2G26740	ATSEH (Arabidopsis thaliana soluble epoxide hydrolase); epoxide hydrolase Encodes a soluble epoxide hydrolase whose expression is induced by auxin and water stress. similar to epoxide hydrolase, putative [Arabidopsis thaliana] (TAIR:AT2G26750.1); similar to soluble epoxide hydrolase [Brassica napus] (GB:CAD30841.1); contains InterPro domain Alpha/beta hydrolase; (InterPro:IPR003089); contains Int…	prediction 2+
AT2G26800	hydroxymethylglutaryl-CoA lyase, putative / 3-hydroxy-3-methylglutarate-CoA lyase, putative / HMG-CoA lyase, putative similar to MAM1 (2-isopropylmalate synthase 3), 2-isopropylmalate synthase [Arabidopsis thaliana] (TAIR:AT5G23010.1); similar to unnamed protein product [Vitis vinifera] (GB:CAO67270.1); contains InterPro domain Pyruvate carboxyltransferase; (InterPro:IPR000891); contains InterPro…	prediction 2+
At2g27490	ATCOAE; ATP binding / dephospho-CoA kinase AT2G27490 encodes dephospho-CoA kinase. The molecular function was shown to phosphorylate the ribosyl moiety forming CoA. similar to unnamed protein product [Vitis vinifera] (GB:CAO39975.1); contains InterPro domain Dephospho-CoA kinase; (InterPro:IPR001977)	Reumann 2009 GFP
AT2G29590	thioesterase family protein similar to thioesterase family protein [Arabidopsis thaliana] (TAIR:AT1G04290.1); similar to unnamed protein product [Vitis vinifera] (GB:CAO21513.1); contains InterPro domain Thioesterase superfamily (InterPro:IPR006683)	Reumann 2009 GFP, prediction 2+
At2g30650	catalytic similar to 3-hydroxyisobutyryl-coenzyme A hydrolase, putative / CoA-thioester hydrolase, putative [Arabidopsis thaliana] (TAIR:AT2G30660.1); similar to unnamed protein product [Vitis vinifera] (GB:CAO62703.1); contains InterPro domain Crotonase, core; (InterPro:IPR001753)	Lingner 2011
AT2G30660	3-hydroxyisobutyryl-coenzyme A hydrolase, putative / CoA-thioester hydrolase, putative similar to CHY1 (BETA-HYDROXYISOBUTYRYL-COA HYDROLASE 1), 3-hydroxyisobutyryl-CoA hydrolase [Arabidopsis thaliana] (TAIR:AT5G65940.1); similar to unnamed protein product [Vitis vinifera] (GB:CAO62703.1); contains InterPro domain Crotonase, core; (InterPro:IPR001753)	Lingner 2011, prediction 2+
AT2G31070	TCP10 (TCP DOMAIN PROTEIN 10); transcription factor similar to TCP4 (TCP FAMILY TRANSCRIPTION FACTOR 4), transcription factor [Arabidopsis thaliana] (TAIR:AT3G15030.2); similar to TCP4 (TCP FAMILY TRANSCRIPTION FACTOR 4), transcription factor [Arabidopsis thaliana] (TAIR:AT3G15030.1); similar to unnamed protein product [Vitis vinifera] (GB:CAO69844.1); contains InterPro domain Transcription facto…	prediction 2+
At2g33150	KAT2/PED1 (PEROXISOME DEFECTIVE 1); acetyl-CoA C-acyltransferase Encodes an organellar (peroxisome, glyoxysome) 3-ketoacyl-CoA thiolase, involved in fatty acid b-oxidation during germination and subsequent seedling growth. Mutants have defects in glyoxysomal fatty acid beta-oxidation. Identical to 3-ketoacyl-CoA thiolase 2, peroxisomal precursor (PED1) [Arabidopsis Thaliana] (GB:Q56WD9;GB:Q93Z35;…	Eubel 2008, Reumann 2009, peroxisome 2010
AT2G33230	flavin-containing monooxygenase, putative / FMO, putative similar to flavin-containing monooxygenase / FMO (YUCCA3) [Arabidopsis thaliana] (TAIR:AT1G04610.1); similar to hypothetical protein [Vitis vinifera] (GB:CAN83595.1); contains InterPro domain FAD-dependent pyridine nucleotide-disulphide oxidoreductase (InterPro:IPR013027); contains InterPro domain Flavin-containing monooxygenase FMO; (Inte…	prediction 2+
AT2G35690	ACX5 (ACYL-COA OXIDASE 5); acyl-CoA oxidase Encodes a putative acyl-CoA oxidase. Expressed uniformly in seedlings and throughout development. Identical to Putative acyl-coenzyme A oxidase 1.2, peroxisomal (ACX1.2) [Arabidopsis Thaliana] (GB:Q9ZQP2); similar to ACX1 (ACYL-COA OXIDASE 1) [Arabidopsis thaliana] (TAIR:AT4G16760.1); similar to peroxisomal acyl-CoA oxidase 1A [Lycopersicon cheesmaniae]…	Eubel 2008, Reumann 2009, peroxisome 2010, prediction 2+
AT2G37650	scarecrow-like transcription factor 9 (SCL9) similar to scarecrow-like transcription factor 14 (SCL14) [Arabidopsis thaliana] (TAIR:AT1G07530.1); similar to unnamed protein product [Vitis vinifera] (GB:CAO15660.1); contains InterPro domain GRAS transcription factor (InterPro:IPR005202)	prediction 2+
AT2G38180	GDSL-motif lipase/hydrolase family protein similar to GDSL-motif lipase/hydrolase family protein [Arabidopsis thaliana] (TAIR:AT3G11210.1); similar to unnamed protein product [Vitis vinifera] (GB:CAO15818.1); contains InterPro domain Esterase, SGNH hydrolase-type, subgroup; (InterPro:IPR013831); contains InterPro domain Lipase, GDSL; (InterPro:IPR001087); contains InterPro domain Esterase, SGNH h…	Eubel 2008, prediction 2+
AT2G38400	AGT3 (ALANINE:GLYOXYLATE AMINOTRANSFERASE 3); alanine-glyoxylate transaminase alanine:glyoxylate aminotransferase 2 homolog (AGT3) mRNA, Identical to Alanine--glyoxylate aminotransferase 2 homolog 2, mitochondrial precursor (AGT3) [Arabidopsis Thaliana] (GB:Q94AL9;GB:O80911); similar to alanine--glyoxylate aminotransferase, putative / beta-alanine-pyruvate aminotransferase, putative / AGT, putati…	prediction 2+
AT2G38760	ANNAT3 (ANNEXIN ARABIDOPSIS 3); calcium ion binding / calcium-dependent phospholipid binding Annexins are calcium binding proteins that are localized in the cytoplasm. When cytosolic Ca2+ increases, they relocate to the plasma membrane. Identical to Annexin D3 (ANN3) [Arabidopsis Thaliana] (GB:Q9SE45;GB:Q9ZVJ7); similar to annexin, putative [Arabidopsis thaliana] (TAIR:AT5G12380.1); similar to un…	prediction 2+
At2g39970	peroxisomal membrane protein (PMP36) similar to ATFOLT1 (ARABIDOPSIS THALIANA FOLATE TRANSPORTER 1), binding / folic acid transporter [Arabidopsis thaliana] (TAIR:AT5G66380.1); similar to unnamed protein product [Vitis vinifera] (GB:CAO69026.1); contains InterPro domain Mitochondrial substrate carrier; (InterPro:IPR001993)	Eubel 2008
At2g41790	peptidase M16 family protein / insulinase family protein similar to peptidase M16 family protein / insulinase family protein [Arabidopsis thaliana] (TAIR:AT3G57470.1); similar to peptidase M16 family protein / insulinase family protein [Arabidopsis thaliana] (TAIR:AT3G57470.2); similar to unnamed protein product [Vitis vinifera] (GB:CAO23585.1); similar to insulin degrading enzyme [Solanum lycope…	Eubel 2008
AT2G42490	copper amine oxidase, putative similar to copper amine oxidase, putative [Arabidopsis thaliana] (TAIR:AT3G43670.1); similar to unnamed protein product [Vitis vinifera] (GB:CAO16112.1); similar to peroxisomal copper-containing amine oxidase [Glycine max] (GB:AAD40979.1); similar to hypothetical protein [Vitis vinifera] (GB:CAN62304.1); contains InterPro domain Copper amine oxidase, N3-terminal; (I…	Eubel 2008, Reumann 2009, peroxisome 2010, prediction 2+
At2g42790	CSY3 (CITRATE SYNTHASE 3); citrate (SI)-synthase Encodes a peroxisomal citrate synthase that is expressed throughout seedling and shoot development. Identical to Citrate synthase 3, peroxisomal precursor (CSY3) [Arabidopsis Thaliana] (GB:Q9SJH7;GB:Q56YQ7); similar to CSY2 (CITRATE SYNTHASE 2), citrate (SI)-synthase [Arabidopsis thaliana] (TAIR:AT3G58750.1); similar to CSY1 (CITRATE SYNTHASE 1), c…	Eubel 2008, Reumann 2009, peroxisome 2010
AT2G43020	ATPAO2 (POLYAMINE OXIDASE 2); amine oxidase similar to ATPAO3 (POLYAMINE OXIDASE 3), oxidoreductase [Arabidopsis thaliana] (TAIR:AT3G59050.1); similar to unnamed protein product [Vitis vinifera] (GB:CAO69965.1); similar to hypothetical protein OsJ_015520 [Oryza sativa (japonica cultivar-group)] (GB:EAZ32037.1); similar to H0215F08.3 [Oryza sativa (indica cultivar-group)] (GB:CAH66792.1); contains…	peroxisomes 2010, prediction 2+
AT2G43220	DC1 domain-containing protein similar to DC1 domain-containing protein [Arabidopsis thaliana] (TAIR:AT4G01910.1); similar to DC1 domain-containing protein [Brassica oleracea] (GB:ABD65623.1); contains InterPro domain Protein kinase C, phorbol ester/diacylglycerol binding; (InterPro:IPR002219); contains InterPro domain C1-like (InterPro:IPR011424); contains InterPro domain Zinc finger, PHD-type; (…	prediction 2+
AT2G44400	DC1 domain-containing protein similar to DC1 domain-containing protein [Arabidopsis thaliana] (TAIR:AT2G27660.1); similar to DC1 domain containing protein [Nicotiana tabacum] (GB:BAF80453.1); contains InterPro domain C1-like (InterPro:IPR011424)	prediction 2+
At2g44490	PEN2 (PENETRATION 2); hydrolase, hydrolyzing O-glycosyl compounds Encodes a glycosyl hydrolase that localizes to peroxisomes and acts as a component of an inducible preinvasion resistance mechanism. Required for mlo resistance. similar to glycosyl hydrolase family 1 protein [Arabidopsis thaliana] (TAIR:AT3G60120.1); similar to beta-glucosidase [Brassica napus] (GB:CAA57913.1); contains InterPro d…	peroxisome 2010
At2g45690	SSE1 (SHRUNKEN SEED 1) Encodes a protein with similarity to yeast Pep16p, a membrane localized protein involved in peroxisome assembly and protein-trafficking. SSE1 mutant seeds do not accumulate oils and dessicated seeds have a shrunken appearance. Involved in protein and oil body biogenesis. SSE is expressed during seed development, reaching the highest peak in mature siliques. Expression in le…	peroxisome 2010
At2g45740	PEX11D member of the peroxin11 (PEX11) gene family, integral to peroxisome membrane, controls peroxisome proliferation. similar to PEX11E [Arabidopsis thaliana] (TAIR:AT3G61070.2); similar to PEX11E [Arabidopsis thaliana] (TAIR:AT3G61070.1); similar to unknown [Populus trichocarpa x Populus deltoides] (GB:ABK96573.1); contains InterPro domain Peroxisomal biogenesis factor 11; (InterPro:IPR008733)	Eubel 2008, Reumann 2009, peroxisome 2010
AT2G47170	ARF1A1c (ADP-RIBOSYLATION FACTOR 1); GTP binding / phospholipase activator/ protein binding Gene encoding ADP-ribosylation factor and similar to other ARFs and ARF-like proteins. Members of this family are known to be essential for vesicle coating and uncoating and functions in GTP-binding. The gene is shown to play a role in cell division, cell expansion and cellulose production using antisense …	prediction 2+
At2g48060	oxidoreductase similar to unnamed protein product [Vitis vinifera] (GB:CAO68575.1); similar to unnamed protein product [Vitis vinifera] (GB:CAO22459.1); contains InterPro domain Cytochrome b/b6, C-terminal; (InterPro:IPR005798)	Lingner 2011
At3g01910	SOX (SULFITE OXIDASE); sulfite oxidase Encodes a homodimeric Mo-enzyme with molybdopterin as organic component of the molybdenum cofactor. It lacks the heme domain that other eukaryotic Mo-enzymes possess and has no redox-active centers other than the molybdenum. SO protein has been found in all parts of the plant. The plant SO combines its enzymatic sulfite oxidation with a subsequent nonenzymat…	Eubel 2008, Reumann 2009, peroxisome 2010
At3g01980	short-chain dehydrogenase/reductase (SDR) family protein similar to short-chain dehydrogenase/reductase (SDR) family protein [Arabidopsis thaliana] (TAIR:AT3G55290.1); similar to short-chain dehydrogenase/reductase (SDR) family protein [Arabidopsis thaliana] (TAIR:AT3G55290.2); similar to unnamed protein product [Vitis vinifera] (GB:CAO49038.1); contains InterPro domain Glucose/ribitol dehydrogen…	Lingner 2011
AT3G02360	6-phosphogluconate dehydrogenase family protein similar to 6-phosphogluconate dehydrogenase family protein [Arabidopsis thaliana] (TAIR:AT5G41670.1); similar to 6-phosphogluconate dehydrogenase family protein [Arabidopsis thaliana] (TAIR:AT1G64190.1); similar to 6-phosphogluconate dehydrogenase family protein [Arabidopsis thaliana] (TAIR:AT5G41670.2); similar to hypothetical protein [Cleome spino…	Eubel 2008, prediction 2+
AT3G02800	phosphoprotein phosphatase similar to tyrosine specific protein phosphatase family protein [Arabidopsis thaliana] (TAIR:AT5G16480.1); similar to Tyrosine specific protein phosphatase and dual specificity protein phosphatase; Putative tyrosine phosphatase [Medicago truncatula] (GB:ABD28384.1); contains InterPro domain Protein-tyrosine phosphatase, SIW14-like (InterPro:IPR004861)	prediction 2+
At3g03490	PEX19-1 (PEROXIN 19-1) similar to PEROXIN 19-2/PEX19-2 [Arabidopsis thaliana] (TAIR:AT5G17550.1); similar to unnamed protein product [Vitis vinifera] (GB:CAO16473.1); contains InterPro domain Pex19 protein; (InterPro:IPR006708)	peroxisome 2010
AT3G04120	GAPC (GLYCERALDEHYDE-3-PHOSPHATE DEHYDROGENASE C SUBUNIT); glyceraldehyde-3-phosphate dehydrogenase encodes cytosolic GADPH (C subunit) involved in the glycolytic pathway but also interacts with H2O2 potentially placing it in a signalling cascade induced by ROS. Identical to Glyceraldehyde-3-phosphate dehydrogenase, cytosolic (GAPC) [Arabidopsis Thaliana] (GB:P25858;GB:Q42352;GB:Q9M8W8); similar …	prediction 2+
At3g04460	APM4/ATPEX12/PEX12 (PEROXIN-12); actin binding RING finger protein involved in peroxisome biogenesis. Identical to Putative peroxisome assembly protein 12 [Arabidopsis Thaliana] (GB:Q9M841); similar to unnamed protein product [Vitis vinifera] (GB:CAO44650.1); contains InterPro domain Pex, N-terminal; (InterPro:IPR006845); contains InterPro domain Adenylate cyclase-associated CAP, N-terminal; (Int…	peroxisome 2010
At3g05290	mitochondrial substrate carrier family protein similar to mitochondrial substrate carrier family protein [Arabidopsis thaliana] (TAIR:AT5G27520.1); similar to mitochondrial FAD carrier [Cucumis melo] (GB:ABR67418.1); contains InterPro domain Mitochondrial substrate carrier; (InterPro:IPR001993); contains InterPro domain Mitochondrial carrier protein; (InterPro:IPR002067)	peroxisome 2010
At3g05970	LACS6 (LONG-CHAIN ACYL-COA SYNTHETASE 6) encode peroxisomal long-chain acyl-CoA synthetase (LACS) isozymes similar to LACS7 (LONG-CHAIN ACYL-COA SYNTHETASE 7) [Arabidopsis thaliana] (TAIR:AT5G27600.1); similar to ACS2 [Ricinus communis] (GB:ABC02881.1); similar to unnamed protein product [Vitis vinifera] (GB:CAO71137.1); similar to AMP-binding protein [Brassica napus] (GB:CAA96522.1); contains In…	Eubel 2008, Reumann 2009, peroxisome 2010
AT3G06520	agenet domain-containing protein similar to agenet domain-containing protein [Arabidopsis thaliana] (TAIR:AT1G09320.1); similar to unnamed protein product [Vitis vinifera] (GB:CAO17405.1); contains InterPro domain Tudor-like, plant (InterPro:IPR014002); contains InterPro domain Agenet; (InterPro:IPR008395)	prediction 2+
AT3G06810	IBR3 (IBA-RESPONSE 3); acyl-CoA dehydrogenase/ oxidoreductase similar to IVD (ISOVALERYL-COA-DEHYDROGENASE) [Arabidopsis thaliana] (TAIR:AT3G45300.1); similar to predicted protein [Physcomitrella patens subsp. patens] (GB:EDQ76603.1); similar to hypothetical protein OsI_026352 [Oryza sativa (indica cultivar-group)] (GB:EAZ05120.1); similar to hypothetical protein OsJ_024552 [Oryza sativa (japonic…	prediction 2+
AT3G06860	MFP2 (MULTIFUNCTIONAL PROTEIN); enoyl-CoA hydratase Encodes a multifunctional protein. Involved in peroxisomal fatty acid beta oxidation. Loss-of-function mutant lacks hydroxyacyl-CoA dehydrogenase activity and have reduced levels of long-chain enoyl-CoA hydratase activity. The mutant has fewer but larger peroxisomes. similar to AIM1 (ABNORMAL INFLORESCENCE MERISTEM), enoyl-CoA hydratase [Arabido…	Eubel 2008, Reumann 2009, peroxisome 2010, prediction 2+
At3g07560	APM2/PEX13 (ABERRANT PEROXISOME MORPHOLOGY 2); protein binding Encodes peroxin 13 (PEX13) involved in protein transport into peroxisomes. similar to unknown [Populus trichocarpa] (GB:ABK93770.1)	peroxisome 2010
AT3G07680	emp24/gp25L/p24 family protein similar to emp24/gp25L/p24 protein-related [Arabidopsis thaliana] (TAIR:AT3G22845.1); similar to unknown [Populus trichocarpa] (GB:ABK92934.1); contains InterPro domain emp24/gp25L/p24; (InterPro:IPR000348); contains InterPro domain GOLD (InterPro:IPR009038)	prediction 2+
AT3G08560	VHA-E2 (VACUOLAR H+-ATPASE SUBUNIT E ISOFORM 2); hydrogen-exporting ATPase, phosphorylative mechanism similar to TUF (VACUOLAR ATP SYNTHASE SUBUNIT E1) [Arabidopsis thaliana] (TAIR:AT4G11150.1); similar to unknown [Populus trichocarpa] (GB:ABK92978.1); contains InterPro domain ATPase, V1/A1 complex, subunit E; (InterPro:IPR002842)	prediction 2+
AT3G08860	alanine--glyoxylate aminotransferase, putative / beta-alanine-pyruvate aminotransferase, putative / AGT, putative Identical to Alanine--glyoxylate aminotransferase 2 homolog 3, mitochondrial precursor [Arabidopsis Thaliana] (GB:Q9SR86); similar to AGT3 (ALANINE:GLYOXYLATE AMINOTRANSFERASE 3), alanine-glyoxylate transaminase [Arabidopsis thaliana] (TAIR:AT2G38400.1); similar to unnamed protein pro…	prediction 2+
AT3G12420	expressed protein	prediction 2+
At3g12800	short-chain dehydrogenase/reductase (SDR) family protein Identical to Peroxisomal 2,4-dienoyl-CoA reductase [Arabidopsis Thaliana] (GB:Q9LTV6;GB:Q67Y37;GB:Q680G7); similar to D2,D4-dienoyl-CoA reductase-related [Arabidopsis thaliana] (TAIR:AT2G07640.1); similar to unnamed protein product [Vitis vinifera] (GB:CAO64912.1); contains InterPro domain Glucose/ribitol dehydrogenase; (InterPro:IPR002347)…	Eubel 2008, Reumann 2009, peroxisome 2010
AT3G13010	hAT dimerisation domain-containing protein similar to hAT dimerisation domain-containing protein [Arabidopsis thaliana] (TAIR:AT3G13020.1); similar to unnamed protein product [Vitis vinifera] (GB:CAO41771.1); contains InterPro domain Protein of unknown function DUF1544 (InterPro:IPR011523); contains InterPro domain Protein of unknown function DUF659 (InterPro:IPR007021); contains InterPro domain …	prediction 2+
AT3G13020	hAT dimerisation domain-containing protein similar to hAT dimerisation domain-containing protein [Arabidopsis thaliana] (TAIR:AT3G13030.2); similar to hAT dimerisation domain-containing protein [Arabidopsis thaliana] (TAIR:AT3G13030.1); similar to hAT dimerisation domain-containing protein [Arabidopsis thaliana] (TAIR:AT3G13010.1); similar to unnamed protein product [Vitis vinifera] (GB:CAO41771.…	prediction 2+
AT3G13610	oxidoreductase, 2OG-Fe(II) oxygenase family protein similar to oxidoreductase, 2OG-Fe(II) oxygenase family protein [Arabidopsis thaliana] (TAIR:AT1G55290.1); similar to unnamed protein product [Vitis vinifera] (GB:CAO22054.1); contains InterPro domain 2OG-Fe(II) oxygenase (InterPro:IPR005123)	prediction 2+
At3g14150	(S)-2-hydroxy-acid oxidase, peroxisomal, putative / glycolate oxidase, putative / short chain alpha-hydroxy acid oxidase, putative similar to (S)-2-hydroxy-acid oxidase, peroxisomal, putative / glycolate oxidase, putative / short chain alpha-hydroxy acid oxidase, putative [Arabidopsis thaliana] (TAIR:AT3G14130.1); similar to unnamed protein product [Vitis vinifera] (GB:CAO45585.1); similar to hyp…	Reumann 2009 GFP
AT3G14290	PAE2 (20S proteasome alpha subunit E2); peptidase Encodes 20S proteasome subunit PAE2 (PAE2). Identical to Proteasome subunit alpha type-5-B (PAE2) [Arabidopsis Thaliana] (GB:Q42134); similar to PAE1 (20S proteasome alpha subunit E1), peptidase [Arabidopsis thaliana] (TAIR:AT1G53850.1); similar to PAE1 (20S proteasome alpha subunit E1) [Arabidopsis thaliana] (TAIR:AT1G53850.2); similar to Proteas…	prediction 2+
At3g14415	(S)-2-hydroxy-acid oxidase, peroxisomal, putative / glycolate oxidase, putative / short chain alpha-hydroxy acid oxidase, putative Identical to Probable peroxisomal [Arabidopsis Thaliana] (GB:Q9LRS0); similar to (S)-2-hydroxy-acid oxidase, peroxisomal, putative / glycolate oxidase, putative / short chain alpha-hydroxy acid oxidase, putative [Arabidopsis thaliana] (TAIR:AT3G14420.1); similar to (S…	Eubel 2008, Reumann 2009, peroxisome 2010
AT3G14420	(S)-2-hydroxy-acid oxidase, peroxisomal, putative / glycolate oxidase, putative / short chain alpha-hydroxy acid oxidase, putative Identical to Probable peroxisomal [Arabidopsis Thaliana] (GB:Q9LRR9;GB:Q8VZA4;GB:Q944K6); similar to (S)-2-hydroxy-acid oxidase, peroxisomal, putative / glycolate oxidase, putative / short chain alpha-hydroxy acid oxidase, putative [Arabidopsis thaliana] (TAIR:AT3G144…	Eubel 2008, Reumann 2009, peroxisome 2010, prediction 2+
At3g15000	Identical to Uncharacterized mitochondrial protein At3g15000 [Arabidopsis Thaliana] (GB:Q9LKA5); similar to plastid developmental protein DAG, putative [Arabidopsis thaliana] (TAIR:AT3G06790.2); similar to unnamed protein product [Vitis vinifera] (GB:CAO39382.1)	Eubel 2008
At3g15290	3-hydroxybutyryl-CoA dehydrogenase, putative similar to AIM1 (ABNORMAL INFLORESCENCE MERISTEM), enoyl-CoA hydratase [Arabidopsis thaliana] (TAIR:AT4G29010.1); similar to unnamed protein product [Vitis vinifera] (GB:CAO39308.1); contains InterPro domain 3-hydroxyacyl-CoA dehydrogenase, C-terminal; (InterPro:IPR006108); contains InterPro domain 3-hydroxyacyl-CoA dehydrogenase, NAD-binding; (InterPr…	Eubel 2008, Reumann 2009, peroxisome 2010
AT3G16910	AAE7/ACN1 (ACYL-ACTIVATING ENZYME 7); AMP binding / acetate-CoA ligase Encodes a peroxisomal protein with acetyl-CoA synthetase activity that is responsible for the activation of acetate for entry into the glyoxylate cycle. similar to AMP-dependent synthetase and ligase family protein [Arabidopsis thaliana] (TAIR:AT1G20560.1); similar to unnamed protein product [Vitis vinifera] (GB:CAO44884.1); s…	Eubel 2008, Reumann 2009, peroxisome 2010, prediction 2+
AT3G17020	universal stress protein (USP) family protein similar to universal stress protein (USP) family protein / early nodulin ENOD18 family protein [Arabidopsis thaliana] (TAIR:AT3G03270.2); similar to unknown [Brassica rapa] (GB:ABL97971.1); contains InterPro domain UspA; (InterPro:IPR006016); contains InterPro domain Universal stress protein (Usp) (InterPro:IPR006015); contains InterPro domain Rossman…	prediction 2+
At3g17420	GPK1 (Glyoxysomal protein kinase 1); kinase serine/threonine protein kinase-like protein similar to protein kinase family protein [Arabidopsis thaliana] (TAIR:AT5G18500.1); similar to protein kinase family protein [Arabidopsis thaliana] (TAIR:AT5G18500.2); similar to unnamed protein product [Vitis vinifera] (GB:CAO70924.1); contains InterPro domain Protein kinase, core; (InterPro:IPR000719); cont…	peroxisome 2010
At3g18160	PEX3-1 (PEROXIN 3-1) similar to PEX3/PEX3-2 (PEROXIN 3-2) [Arabidopsis thaliana] (TAIR:AT1G48635.1); similar to unnamed protein product [Vitis vinifera] (GB:CAO68158.1); contains InterPro domain Peroxin-3; (InterPro:IPR006966)	peroxisome 2010
At3g20530	protein kinase family protein similar to PBS1 (AVRPPHB SUSCEPTIBLE 1), kinase [Arabidopsis thaliana] (TAIR:AT5G13160.1); similar to protein kinase family protein [Arabidopsis thaliana] (TAIR:AT5G18610.1); similar to unnamed protein product [Vitis vinifera] (GB:CAO39431.1); contains InterPro domain Serine/threonine protein kinase; (InterPro:IPR002290); contains InterPro domain Protein kinase, core…	Lingner 2011
AT3G21720	isocitrate lyase, putative Identical to Isocitrate lyase (ICL) [Arabidopsis Thaliana] (GB:P28297;GB:Q41948;GB:Q9LSZ2); similar to Isocitrate lyase (Isocitrase) (Isocitratase) (ICL) (GB:P17069); similar to Isocitrate lyase (Isocitrase) (Isocitratase) (ICL) (GB:P25248); similar to glyoxysomal isocitrate lyase [Brassica napus] (GB:CAA73792.1); contains InterPro domain Isocitrate lyase and phosphoryl…	peroxisomes 2010, prediction 2+
At3g21865	PEX22 (PEROXIN 22); protein binding Interacts with PEX4 in a yeast two-hybrid. The PEX4 and PEX22 pair may be important during the remodeling of peroxisome matrix contents as glyoxysomes transition to leaf peroxisomes. similar to unnamed protein product [Vitis vinifera] (GB:CAO24163.1)	peroxisome 2010
AT3G23860	GTP-binding protein-related similar to GTP-binding protein-related [Arabidopsis thaliana] (TAIR:AT1G10300.1); similar to GTP-binding protein-related [Arabidopsis thaliana] (TAIR:AT1G50920.1); similar to unnamed protein product [Vitis vinifera] (GB:CAO21916.1); contains domain gb def: Gb|AAD32880.1 (PTHR11702:SF2); contains domain DEVELOPMENTALLY REGULATED GTP-BINDING PROTEIN-RELATED (PTHR11702)	prediction 2+
At3g24170	ATGR1 (GLUTATHIONE-DISULFIDE REDUCTASE); glutathione-disulfide reductase Encodes a cytosolic glutathione reductase. Identical to Glutathione reductase, cytosolic [Arabidopsis Thaliana] (GB:P48641;GB:Q94BM6;GB:Q9C5I4); similar to GR (GLUTATHIONE REDUCTASE), glutathione-disulfide reductase [Arabidopsis thaliana] (TAIR:AT3G54660.1); similar to Glutathione reductase, cytosolic (GR) (GRase) (GB:O04955…	Eubel 2008
AT3G24680	similar to zinc finger protein, putative [Arabidopsis thaliana] (TAIR:AT2G15520.1); similar to 80C09_29 [Brassica rapa subsp. pekinensis] (GB:AAZ41840.1)	prediction 2+
At3g25530	ATGHBDH/GHBDH; 3-hydroxybutyrate dehydrogenase/ phosphogluconate dehydrogenase (decarboxylating) Encodes gamma-hydroxybutyrate dehydrogenase (AtGHBDH). Contains a NADP-binding domain. GHBDH is proposed to function in oxidative stress tolerance. similar to phosphogluconate dehydrogenase (decarboxylating) [Arabidopsis thaliana] (TAIR:AT1G17650.1); similar to hypothetical protein [Vitis vinifera] (G…	peroxisome 2010
AT3G27290	F-box family protein-related similar to F-box family protein [Arabidopsis thaliana] (TAIR:AT3G26000.1); similar to unnamed protein product [Vitis vinifera] (GB:CAO14619.1); contains domain SSF52047 (SSF52047); contains domain PTHR23125 (PTHR23125); contains domain G3DSA:3.80.10.10 (G3DSA:3.80.10.10)	prediction 2+
At3g27820	ATMDAR4/MDAR4 (MONODEHYDROASCORBATE REDUCTASE 4); monodehydroascorbate reductase (NADH) Encodes a peroxisome membrane-bound monodehydroascorbate reductase, involved in the ascorbate-glutathione cycle which removes toxic H2O2 Identical to Probable monodehydroascorbate reductase, cytoplasmic isoform 2 [Arabidopsis Thaliana] (GB:Q9LK94); similar to ATMDAR1 (MONODEHYDROASCORBATE REDUCTASE 1), monodeh…	Reumann 2009
AT3G28020	similar to ATP binding / DNA binding [Arabidopsis thaliana] (TAIR:AT3G48770.1); similar to unnamed protein product [Vitis vinifera] (GB:CAO68348.1)	prediction 2+
AT3G28600	ATP binding / ATPase similar to ATP binding / ATPase [Arabidopsis thaliana] (TAIR:AT3G28610.1); similar to AAA-type ATPase family protein [Arabidopsis thaliana] (TAIR:AT5G40000.1); similar to unnamed protein product [Vitis vinifera] (GB:CAO14845.1); contains InterPro domain AAA+ ATPase, core; (InterPro:IPR003593); contains InterPro domain AAA ATPase, core; (InterPro:IPR003959)	prediction 2+
AT3G42750	similar to unknown protein [Arabidopsis thaliana] (TAIR:AT3G32394.1)	prediction 2+
AT3G42790	PHD finger family protein similar to PHD finger family protein [Arabidopsis thaliana] (TAIR:AT5G20510.1); similar to PHD finger/nucleic acid binding protein [Olimarabidopsis pumila] (GB:ABA18096.1); contains InterPro domain Zinc finger, RING/FYVE/PHD-type (InterPro:IPR013083); contains InterPro domain Zinc finger, PHD-type; (InterPro:IPR001965); contains InterPro domain Zinc finger, FYVE/PHD-type…	prediction 2+
AT3G43170	similar to unknown protein [Arabidopsis thaliana] (TAIR:AT5G54330.1); contains InterPro domain Protein of unknown function DUF295 (InterPro:IPR005174)	prediction 2+
At3g44830	lecithin:cholesterol acyltransferase family protein / LACT family protein similar to ATPDAT (Arabidopsis thaliana phospholipid:diacylglycerol acyltransferase), phosphatidylcholine-sterol O-acyltransferase [Arabidopsis thaliana] (TAIR:AT5G13640.1); similar to hypothetical protein [Ipomoea trifida] (GB:BAF36362.1); similar to putative phosphatidylcholine-sterol acyltransferase [Ipomoea trifida] (GB…	Lingner 2011
At3g47430	PEX11B member of the peroxin11 (PEX11) gene family, located on the peroxisome membrane, controls peroxisome proliferation. similar to PEX11A [Arabidopsis thaliana] (TAIR:AT1G47750.1); similar to unnamed protein product [Vitis vinifera] (GB:CAO42705.1); contains InterPro domain Peroxisomal biogenesis factor 11; (InterPro:IPR008733)	Reumann 2009
AT3G47630	similar to unnamed protein product [Vitis vinifera] (GB:CAO41928.1); contains InterPro domain Mitochondrial matrix Mmp37 (InterPro:IPR015222)	prediction 2+
AT3G48100	ARR5 (ARABIDOPSIS RESPONSE REGULATOR 5); transcription regulator/ two-component response regulator Encodes a transcription repressor that mediates a negative feedback loop in cytokinin signalling. ARR5 expression is upregulated by Class I KNOX genes. Arr5 protein is stabilized by cytokinin in a two-component phosphorelay. Identical to Two-component response regulator ARR5 (ARR5) [Arabidopsis Thal…	prediction 2+
At3g48140	senescence-associated protein, putative similar to germination protein-related [Arabidopsis thaliana] (TAIR:AT3G29970.1); similar to HvB12D [Hordeum vulgare subsp. vulgare] (GB:CAA54065.1); contains InterPro domain B12D (InterPro:IPR010530)	Reumann 2009 GFP
At3g48170	ALDH10A9 (Aldehyde dehydrogenase 10A9); 3-chloroallyl aldehyde dehydrogenase Arabidopsis thaliana putative betaine aldehyde dehydrogenase Identical to Betaine aldehyde dehydrogenase 2, mitochondrial precursor (ALDH10A9) [Arabidopsis Thaliana] (GB:Q9STS1;GB:Q42237); similar to ALDH10A8 (Aldehyde dehydrogenase 10A8), 3-chloroallyl aldehyde dehydrogenase [Arabidopsis thaliana] (TAIR:AT1G74920.1); si…	Eubel 2008
AT3G48730	GSA2 (GLUTAMATE-1-SEMIALDEHYDE 2,1-AMINOMUTASE 2); glutamate-1-semialdehyde 2,1-aminomutase Identical to Glutamate-1-semialdehyde 2,1-aminomutase 2, chloroplast precursor (GSA2) [Arabidopsis Thaliana] (GB:Q42522;GB:Q1JPM9;GB:Q9SMM6); similar to GSA1 (GLUTAMATE-1-SEMIALDEHYDE-2,1-AMINOMUTASE), glutamate-1-semialdehyde 2,1-aminomutase [Arabidopsis thaliana] (TAIR:AT5G63570.1); similar to Glutamate-…	prediction 2+
AT3G51660	macrophage migration inhibitory factor family protein / MIF family protein similar to macrophage migration inhibitory factor family protein / MIF family protein [Arabidopsis thaliana] (TAIR:AT5G01650.1); similar to unnamed protein product [Vitis vinifera] (GB:CAO48792.1); contains InterPro domain Tautomerase (InterPro:IPR014347); contains InterPro domain Macrophage migration inhibitory factor (In…	prediction 2+
AT3G51840	ACX4 (ACYL-COA OXIDASE 4); oxidoreductase Encodes a short-chain acyl-CoA oxidase, which catalyzes the first step of peroxisomal fatty acid beta-oxidation during early, post-germinative growth in oilseed species. Null mutants virtually lack short-chain acyl-CoA and are resistant to 2,4-dichlorophenoxybutyric acid, which is converted to the herbicide and auxin analogue 2,4-dichlorophenoxyacetic aci…	Eubel 2008, Reumann 2009, peroxisome 2010, prediction 2+
AT3G52280	GTE6 (GENERAL TRANSCRIPTION FACTOR GROUP E6); DNA binding Bromodomain containing nuclear-localized protein involved in leaf development. GTE6 binds to the promoter and intron of AS1 and regulates its expression via histone acetylation. Identical to Transcription factor GTE6 (GTE6) [Arabidopsis Thaliana] (GB:Q9FT54); similar to IMB1 (IMBIBITION-INDUCIBLE 1), DNA binding [Arabidopsis thaliana] (TAI…	prediction 2+
AT3G52880	ATMDAR1 (MONODEHYDROASCORBATE REDUCTASE 1); monodehydroascorbate reductase (NADH) Encodes a peroxisomal monodehydroascorbate reductase, involved in the ascorbate-glutathione cycle which removes toxic H2O2 Identical to Probable monodehydroascorbate reductase, cytoplasmic isoform 3 [Arabidopsis Thaliana] (GB:Q9LFA3;GB:Q8LBV9); similar to ATMDAR2, monodehydroascorbate reductase (NADH) [Arabidopsis t…	Eubel 2008, Reumann 2009, peroxisome 2010, prediction 2+
At3g55290	short-chain dehydrogenase/reductase (SDR) family protein similar to oxidoreductase [Arabidopsis thaliana] (TAIR:AT3G55310.1); similar to unknown [Populus trichocarpa] (GB:ABK93994.1); contains InterPro domain Glucose/ribitol dehydrogenase; (InterPro:IPR002347); contains InterPro domain Short-chain dehydrogenase/reductase SDR; (InterPro:IPR002198); contains InterPro domain NAD(P)-binding; (InterPr…	Eubel 2008
AT3G55570	similar to unknown protein [Arabidopsis thaliana] (TAIR:AT5G41761.1); similar to unnamed protein product [Vitis vinifera] (GB:CAO69142.1)	prediction 2+
At3g55640	mitochondrial substrate carrier family protein similar to mitochondrial substrate carrier family protein [Arabidopsis thaliana] (TAIR:AT3G53940.1); similar to unnamed protein product [Vitis vinifera] (GB:CAO69128.1); contains InterPro domain Adenine nucleotide translocator 1; (InterPro:IPR002113); contains InterPro domain Mitochondrial substrate carrier; (InterPro:IPR001993); contains InterPro do…	peroxisome 2010
AT3G56220	transcription regulator similar to transcription regulator [Arabidopsis thaliana] (TAIR:AT2G40435.1); similar to unnamed protein product [Vitis vinifera] (GB:CAO41465.1); contains InterPro domain Basic helix-loop-helix dimerisation region bHLH; (InterPro:IPR001092)	prediction 2+
AT3G56260	unknown protein	prediction 2+
AT3G56460	oxidoreductase, zinc-binding dehydrogenase family protein similar to oxidoreductase, zinc-binding dehydrogenase family protein [Arabidopsis thaliana] (TAIR:AT4G21580.1); similar to unknown [Populus trichocarpa] (GB:ABK95387.1); contains InterPro domain Alcohol dehydrogenase GroES-like (InterPro:IPR013154); contains InterPro domain NAD(P)-binding; (InterPro:IPR016040); contains InterPro domain Gro…	Eubel 2008, Reumann 2009, peroxisome 2010, prediction 2+
At3g56490	zinc-binding protein, putative / protein kinase C inhibitor, putative similar to zinc-binding protein, putative / protein kinase C inhibitor, putative [Arabidopsis thaliana] (TAIR:AT1G31160.1); similar to unnamed protein product [Vitis vinifera] (GB:CAO45395.1); contains InterPro domain Histidine triad (HIT) protein (InterPro:IPR001310); contains InterPro domain Histidine triad-like motif; (Inter…	Reumann 2009 GFP
AT3G56600	inositol or phosphatidylinositol kinase similar to phosphatidylinositol 3- and 4-kinase family protein [Arabidopsis thaliana] (TAIR:AT2G40850.1); similar to unnamed protein product [Vitis vinifera] (GB:CAO18257.1); contains InterPro domain Phosphatidylinositol 3- and 4-kinase, catalytic; (InterPro:IPR000403)	prediction 2+
AT3G56870	similar to unnamed protein product [Vitis vinifera] (GB:CAO61177.1)	prediction 2+
At3g57090	BIGYIN; binding similar to binding [Arabidopsis thaliana] (TAIR:AT5G12390.1); similar to unnamed protein product [Vitis vinifera] (GB:CAO63076.1); contains InterPro domain Tetratricopeptide-like helical; (InterPro:IPR011990); contains InterPro domain Tetratricopeptide repeat 11 Fission 1 protein (InterPro:IPR016543)	peroxisome 2010
At3g57810	OTU-like cysteine protease family protein similar to unknown protein [Arabidopsis thaliana] (TAIR:AT2G38025.1); similar to hypothetical protein [Vitis vinifera] (GB:CAN60311.1); contains InterPro domain Ovarian tumour, otubain (InterPro:IPR003323)	Lingner 2011
At3g58750	CSY2 (CITRATE SYNTHASE 2); citrate (SI)-synthase Encodes a peroxisomal citrate synthase that is expressed throughout seedling and shoot development. Identical to Citrate synthase 2, peroxisomal precursor (CSY2) [Arabidopsis Thaliana] (GB:Q9LXS6;GB:Q570I4); similar to CSY3 (CITRATE SYNTHASE 3), citrate (SI)-synthase [Arabidopsis thaliana] (TAIR:AT2G42790.1); similar to CSY1 (CITRATE SYNTHASE 1), c…	Eubel 2008, Reumann 2009, peroxisome 2010
AT3G59050	ATPAO3 (POLYAMINE OXIDASE 3); oxidoreductase similar to ATPAO2 (POLYAMINE OXIDASE 2), amine oxidase [Arabidopsis thaliana] (TAIR:AT2G43020.1); similar to unnamed protein product [Vitis vinifera] (GB:CAO69965.1); similar to amine oxidase family protein [Musa acuminata] (GB:ABF69974.1); similar to H0215F08.3 [Oryza sativa (indica cultivar-group)] (GB:CAH66792.1); contains InterPro domain Flavin-con…	peroxisome 2010, prediction 2+
AT3G59710	short-chain dehydrogenase/reductase (SDR) family protein similar to short-chain dehydrogenase/reductase (SDR) family protein [Arabidopsis thaliana] (TAIR:AT5G51030.1); similar to putative short-chain hydrogenase/reductase [Musa acuminata] (GB:AAR96014.1); contains InterPro domain Glucose/ribitol dehydrogenase; (InterPro:IPR002347); contains InterPro domain Short-chain dehydrogenase/reductase SDR;…	prediction 2+
AT3G60350	armadillo/beta-catenin repeat family protein / F-box family protein ARABIDILLO-2 and its homolog, ARABIDILLO -1, are unique among Arabidopsis Arm-repeat proteins in having an F-box motif and fall into a phylogenetically distinct subgroup from other plant Arm-repeat proteins Similar to arm repeat protein in rice and armadillo/beta-catenin repeat family protein / F-box family protein in Dictyosteli…	prediction 2+
AT3G60680	similar to unknown protein [Arabidopsis thaliana] (TAIR:AT2G45260.1); similar to unnamed protein product [Vitis vinifera] (GB:CAO24509.1); contains InterPro domain Protein of unknown function DUF641, plant (InterPro:IPR006943)	prediction 2+
At3g61070	PEX11E member of the peroxin11 (PEX11) gene family, integral to peroxisome membrane, controls peroxisome proliferation. similar to PEX11D [Arabidopsis thaliana] (TAIR:AT2G45740.1); similar to PEX11D [Arabidopsis thaliana] (TAIR:AT2G45740.2); similar to PEX11D [Arabidopsis thaliana] (TAIR:AT2G45740.3); similar to unknown [Populus trichocarpa x Populus deltoides] (GB:ABK96573.1); contains InterPro …	Eubel 2008, Reumann 2009, peroxisome 2010
AT3G61200	thioesterase family protein similar to thioesterase family protein [Arabidopsis thaliana] (TAIR:AT1G04290.1); similar to unnamed protein product [Vitis vinifera] (GB:CAO24367.1); contains InterPro domain Thioesterase superfamily (InterPro:IPR006683)	Eubel 2008, Reumann 2009, peroxisome 2010, prediction 2+
AT3G61660	similar to unknown protein [Arabidopsis thaliana] (TAIR:AT2G46375.1)	prediction 2+
AT3G61960	protein kinase family protein similar to protein kinase family protein [Arabidopsis thaliana] (TAIR:AT2G37840.1); similar to unnamed protein product [Vitis vinifera] (GB:CAO24339.1); contains InterPro domain Serine/threonine protein kinase; (InterPro:IPR002290); contains InterPro domain Protein kinase, core; (InterPro:IPR000719); contains InterPro domain Protein kinase-like (InterPro:IPR011009); …	prediction 2+
AT3G62290	ATARFA1E (ADP-RIBOSYLATION FACTOR A1E); GTP binding / phospholipase activator/ protein binding A member of ARF GTPase family. A thaliana has 21 members of this family, known to be essential for vesicle coating and uncoating and functions in GTP-binding. The gene is shown to play a role in cell division, cell expansion and cellulose production using antisense construct. Identical to ADP-ribosylati…	prediction 2+
At4g00520	acyl-CoA thioesterase family protein, contains Pfam profile: PF02551 acyl-CoA thioesterase	Eubel 2008
At4g02340	epoxide hydrolase, putative similar to epoxide hydrolase, putative [Arabidopsis thaliana] (TAIR:AT3G05600.1); similar to unknown [Populus trichocarpa] (GB:ABK93786.1); contains InterPro domain Alpha/beta hydrolase; (InterPro:IPR003089); contains InterPro domain Alpha/beta hydrolase fold-1 (InterPro:IPR000073); contains InterPro domain Epoxide hydrolase-like; (InterPro:IPR000639)	Eubel 2008, Reumann 2009, peroxisome 2010
AT4G03660	similar to replication protein-related [Arabidopsis thaliana] (TAIR:AT4G07440.1); similar to replication protein-related [Arabidopsis thaliana] (TAIR:AT2G05880.1); contains InterPro domain Nucleic acid-binding, OB-fold; (InterPro:IPR008994)	prediction 2+
At4g04320	malonyl-CoA decarboxylase family protein similar to unnamed protein product [Vitis vinifera] (GB:CAO69666.1); similar to hypothetical protein [Vitis vinifera] (GB:CAN68636.1); contains InterPro domain Malonyl-CoA decarboxylase; (InterPro:IPR007956)	Eubel 2008, Reumann 2009, peroxisome 2010
At4g04470	PMP22 (peroxisomal membrane protein 22) 22-kD peroxisomal membrane protein, an integral membrane protein embedded in the lipid bilayer. Identical to Peroxisomal membrane protein PMP22 (PMP22) [Arabidopsis Thaliana] (GB:Q9ZS51); similar to unknown protein [Arabidopsis thaliana] (TAIR:AT4G14305.1); similar to hypothetical protein [Vitis vinifera] (GB:CAN70890.1); contains InterPro domain Mpv17/PMP2…	Eubel 2008
AT4G05080	F-box family protein Identical to F-box/Kelch-repeat protein At4g05080 [Arabidopsis Thaliana] (GB:Q9S9T0); similar to F-box family protein [Arabidopsis thaliana] (TAIR:AT3G19880.1); contains InterPro domain Cyclin-like F-box (InterPro:IPR001810); contains InterPro domain F-box associated type 1 (InterPro:IPR006527)	prediction 2+
AT4G05160	4-coumarate--CoA ligase, putative / 4-coumaroyl-CoA synthase, putative Encodes a peroxisomal protein involved in the activation of fatty acids through esterification with CoA. At4g05160 preferentially activates fatty acids with medium chain length (C6:0 and C7:0) as well as even-numbered long-chain fatty acids (C14:0, C16:0 and C18:0). At4g05160 was also able to catalyze the conversion of OPC-6:0…	Eubel 2008, Reumann 2009, peroxisome 2010, prediction 2+
AT4G05530	short-chain dehydrogenase/reductase (SDR) family protein similar to tropinone reductase, putative / tropine dehydrogenase, putative [Arabidopsis thaliana] (TAIR:AT2G29150.1); similar to unnamed protein product [Vitis vinifera] (GB:CAO23245.1); contains InterPro domain Glucose/ribitol dehydrogenase; (InterPro:IPR002347); contains InterPro domain Short-chain dehydrogenase/reductase SDR; (InterPro:I…	Eubel 2008, Reumann 2009, peroxisome 2010, prediction 2+
At4g09320	NDPK1 (nucleoside diphosphate kinase 1); ATP binding / nucleoside diphosphate kinase nucleoside diphosphate kinase type 1 (NDPK1) gene, complete Identical to Nucleoside diphosphate kinase 1 (NDPK1) [Arabidopsis Thaliana] (GB:P39207;GB:Q41989); similar to NDPK2 (NUCLEOSIDE DIPHOSPHATE KINASE 2), ATP binding / nucleoside diphosphate kinase [Arabidopsis thaliana] (TAIR:AT5G63310.1); similar to nucle…	Reumann 2009 GFP
AT4G10920	KELP; DNA binding / transcription coactivator Transcriptional co-activator. Forms homodimers or heterodimers with the kiwi protein. Both proteins are involved in gene activation during pathogen defense and plant development. Identical to RNA polymerase II transcriptional coactivator KELP (KELP) [Arabidopsis Thaliana] (GB:O65155); similar to zinc knuckle (CCHC-type) family protein [Arabidopsis tha…	prediction 2+
AT4G11450	similar to unknown protein [Arabidopsis thaliana] (TAIR:AT1G63520.1); similar to hypothetical protein [Vitis vinifera] (GB:CAN65660.1)	prediction 2+
AT4G12380	unknown protein	prediction 2+
At4g12800	PSAL (photosystem I subunit L) Encodes subunit L of photosystem I reaction center. Identical to Photosystem I reaction center subunit XI, chloroplast precursor (PSAL) [Arabidopsis Thaliana] (GB:Q9SUI4;GB:Q9ST32;GB:Q9SU06); similar to photosystem I subunit XI [Nicotiana attenuata] (GB:AAO85557.1); contains InterPro domain Photosystem I reaction centre, subunit XI PsaL; (InterPro:IPR003757)	peroxisome 2010
At4g14430	enoyl-CoA hydratase/isomerase family protein similar to enoyl-CoA hydratase/isomerase family protein [Arabidopsis thaliana] (TAIR:AT4G14440.1); similar to hypothetical protein [Vitis vinifera] (GB:CAN82902.1); contains InterPro domain Crotonase, core; (InterPro:IPR001753)	Eubel 2008, Reumann 2009, peroxisome 2010
At4g16210	enoyl-CoA hydratase/isomerase family protein similar to naphthoate synthase, putative / dihydroxynaphthoic acid synthetase, putative / DHNA synthetase, putative [Arabidopsis thaliana] (TAIR:AT1G60550.1); similar to putative enoyl CoA hydratase [Cicer arietinum] (GB:CAB61740.1); contains InterPro domain Crotonase, core; (InterPro:IPR001753)	Eubel 2008, Reumann 2009, peroxisome 2010
AT4G16280	FCA; RNA binding Involved in the promotion of the transition of the vegetative meristem to reproductive development. Four forms of the protein (alpha, beta, delta and gamma) are produced by alternative splicing. Involved in RNA-mediated chromatin silencing. Identical to Flowering time control protein FCA (FCA) [Arabidopsis Thaliana] (GB:O04425;GB:O04424;GB:O04727); similar to flowering time contr…	prediction 2+
At4g16340	SPK1 (SPIKE1); GTP binding / GTPase binding / binding / guanyl-nucleotide exchange factor mutant has Seedling lethal; Cotyledon, leaf-shape, trichome defects; Putative Cytoskeletal Protein similar to hypothetical protein OsI_011082 [Oryza sativa (indica cultivar-group)] (GB:EAY89849.1); similar to Putative adapter protein SPIKE1 [Oryza sativa (japonica cultivar-group)] (GB:AAN65000.1); similar to…	Lingner 2011
At4g16566	histidine triad family protein / HIT family protein similar to unnamed protein product [Vitis vinifera] (GB:CAO16478.1); contains InterPro domain Histidine triad (HIT) protein (InterPro:IPR001310); contains InterPro domain Histidine triad-like motif; (InterPro:IPR011146); contains InterPro domain Histidine triad motif; (InterPro:IPR011151)	Eubel 2008, Reumann 2009, peroxisome 2010
At4g16760	ACX1 (ACYL-COA OXIDASE 1) Encodes a medium to long-chain acyl-CoA oxidase. Catalyzing the first step of fatty acid beta-oxidation. Gene expression is induced by wounding, drought stress, abscisic acid, and jasmonate. Identical to Acyl-coenzyme A oxidase 1, peroxisomal (ACX1) [Arabidopsis Thaliana] (GB:O65202;GB:O23518); similar to ACX5 (ACYL-COA OXIDASE 5), acyl-CoA oxidase [Arabidopsis thaliana]…	Eubel 2008, Reumann 2009, peroxisome 2010
AT4G17410	similar to unknown protein [Arabidopsis thaliana] (TAIR:AT5G47430.2); similar to unknown protein [Arabidopsis thaliana] (TAIR:AT5G47430.1); similar to hypothetical protein 31.t00039 [Brassica oleracea] (GB:ABD65123.1); similar to hypothetical protein 24.t00020 [Brassica oleracea] (GB:ABD64942.1); contains InterPro domain DWNN domain (InterPro:IPR014891); contains InterPro domain Zinc finger, RING…	prediction 2+
At4g17530	RAB1C; GTP binding similar to AtRABD2b/AtRab1A (Arabidopsis Rab GTPase homolog D2b), GTP binding [Arabidopsis thaliana] (TAIR:AT5G47200.1); similar to GTP-binding protein, putative [Brassica oleracea] (GB:ABD65068.1); contains InterPro domain Ras GTPase; (InterPro:IPR001806); contains InterPro domain Ras (InterPro:IPR013753); contains InterPro domain Small GTP-binding protein; (InterPro:IPR005225…	Reumann 2009 GFP
AT4G18360	(S)-2-hydroxy-acid oxidase, peroxisomal, putative / glycolate oxidase, putative / short chain alpha-hydroxy acid oxidase, putative similar to (S)-2-hydroxy-acid oxidase, peroxisomal, putative / glycolate oxidase, putative / short chain alpha-hydroxy acid oxidase, putative [Arabidopsis thaliana] (TAIR:AT3G14420.1); similar to (S)-2-hydroxy-acid oxidase, peroxisomal, putative / glycolate oxidase, p…	Eubel 2008, prediction 2+
AT4G18870	heat shock transcription factor family protein similar to AT-HSFA4A (Arabidopsis thaliana heat shock transcription factor A4A), DNA binding / transcription factor [Arabidopsis thaliana] (TAIR:AT4G18880.1); similar to heat shock factor [Nicotiana tabacum] (GB:BAA83711.1); contains InterPro domain Winged helix repressor DNA-binding (InterPro:IPR011991); contains InterPro domain Heat shock factor (H…	prediction 2+
AT4G18950	ankyrin protein kinase, putative similar to ankyrin protein kinase, putative [Arabidopsis thaliana] (TAIR:AT3G58760.1); similar to flag-tagged protein kinase domain of putative mitogen-activated protein kinase kinase kinase [synthetic construct] (GB:ABK06434.1); contains InterPro domain Protein kinase, core; (InterPro:IPR000719); contains InterPro domain Protein kinase-like (InterPro:IPR011009); …	prediction 2+
AT4G18970	GDSL-motif lipase/hydrolase family protein similar to GDSL-motif lipase/hydrolase family protein [Arabidopsis thaliana] (TAIR:AT5G45670.1); similar to unnamed protein product [Vitis vinifera] (GB:CAO70243.1); contains InterPro domain Lipase, GDSL; (InterPro:IPR001087)	prediction 2+
AT4G19170	NCED4 (NINE-CIS-EPOXYCAROTENOID DIOXYGENASE 4) chloroplast-targeted member of a family of enzymes similar to nine-cis-epoxycarotenoid dioxygenase Identical to Probable carotenoid cleavage dioxygenase 4, chloroplast precursor (CCD4) [Arabidopsis Thaliana] (GB:O49675); similar to NCED5 (NINE-CIS-EPOXYCAROTENOID DIOXYGENASE 5) [Arabidopsis thaliana] (TAIR:AT1G30100.1); similar to carotenoid cleavage…	prediction 2+
AT4G19730	glycosyl hydrolase family 18 protein similar to hydrolase, hydrolyzing O-glycosyl compounds [Arabidopsis thaliana] (TAIR:AT4G19760.1); similar to unnamed protein product [Vitis vinifera] (GB:CAO24276.1); contains InterPro domain Glycoside hydrolase, family 18, catalytic domain; (InterPro:IPR001223); contains InterPro domain Chitinase II; (InterPro:IPR011583); contains InterPro domain Glycoside hy…	prediction 2+
AT4G21490	NDB3; NADH dehydrogenase similar to NDB1 (NAD(P)H DEHYDROGENASE B1), NADH dehydrogenase/ disulfide oxidoreductase [Arabidopsis thaliana] (TAIR:AT4G28220.1); similar to NDB4 (NAD(P)H DEHYDROGENASE B4), NADH dehydrogenase [Arabidopsis thaliana] (TAIR:AT2G20800.1); similar to NDB2 (NAD(P)H DEHYDROGENASE B2), disulfide oxidoreductase [Arabidopsis thaliana] (TAIR:AT4G05020.1); similar to hypothetical …	prediction 2+
AT4G21590	ENDO3 (ENDONUCLEASE 3); T/G mismatch-specific endonuclease/ endonuclease/ nucleic acid binding / single-stranded DNA specific endodeoxyribonuclease Encodes a putative endonuclease but no demonstrable endonuclease activity, either towards single stranded DNA or mismatches, has been seen in vitro. Activated by AGAMOUS in a cal-1, ap1-1 background. Expressed in the floral meristem and during stamen …	prediction 2+
AT4G22580	exostosin family protein similar to exostosin family protein [Arabidopsis thaliana] (TAIR:AT4G13990.1); similar to unnamed protein product [Vitis vinifera] (GB:CAO70332.1); contains InterPro domain Exostosin-like; (InterPro:IPR004263)	prediction 2+
AT4G23670	major latex protein-related / MLP-related similar to major latex protein-related / MLP-related [Arabidopsis thaliana] (TAIR:AT4G23680.1); similar to major latex protein [Ficus awkeotsang] (GB:AAQ07269.1); contains InterPro domain Bet v I allergen; (InterPro:IPR000916)	prediction 2+
AT4G23760	unknown protein	prediction 2+
AT4G29010	AIM1 (ABNORMAL INFLORESCENCE MERISTEM); enoyl-CoA hydratase Functions in beta-oxidation of fatty acids, similar to CuMFP with L-3-hydroxyacyl-CoA hydrolyase , L-3-hydroxyacyl-dehydrogenase, D-3-hydroxyacyl-CoA epimerase, and 3, 2-enoyl-CoA isomerase activities similar to MFP2 (MULTIFUNCTIONAL PROTEIN), enoyl-CoA hydratase [Arabidopsis thaliana] (TAIR:AT3G06860.1); similar to unnamed protein produ…	Eubel 2008, Reumann 2009, peroxisome 2010, prediction 2+
AT4G31460	ribosomal protein L28 family protein similar to unnamed protein product [Vitis vinifera] (GB:CAO60970.1); similar to hypothetical protein [Vitis vinifera] (GB:CAN79404.1); contains InterPro domain Ribosomal protein L28; (InterPro:IPR001383)	prediction 2+
AT4G31850	PGR3 (PROTON GRADIENT REGULATION 3) encodes a protein containing 27 pentatrico-peptide repeat (PPR) motifs similar to pentatricopeptide (PPR) repeat-containing protein [Arabidopsis thaliana] (TAIR:AT1G62910.1); similar to unnamed protein product [Vitis vinifera] (GB:CAO44353.1); similar to pentatricopeptide, putative, expressed [Oryza sativa (japonica cultivar-group)] (GB:ABB47632.1); similar to …	prediction 2+
At4g33650	ADL2 (ARABIDOPSIS DYNAMIN-LIKE 2); GTP binding / GTPase Encodes a protein with high sequence similarity to the dynamin superfamily. Among those members ADL2 was most closely related to Dnm1p of yeast and likely a member of the Vps1p subfamily. Widely expressed in various tissues with highest expression in flower tissues. Chloroplast localized. Identical to Dynamin-related protein 3A (DRP3A) [Arab…	peroxisome 2010
AT4G34270	TIP41-like family protein similar to unnamed protein product [Vitis vinifera] (GB:CAO70856.1); contains InterPro domain TIP41-like protein (InterPro:IPR007303)	prediction 2+
At4g35000	APX3 (ASCORBATE PEROXIDASE 3); L-ascorbate peroxidase Encodes a microsomal ascorbate peroxidase APX3. Ascorbate peroxidases are enzymes that scavenge hydrogen peroxide in plant cells. Eight types of APX have been described for Arabidopsis: three cytosolic (APX1, APX2, APX6), two chloroplastic types (stromal sAPX, thylakoid tAPX), and three microsomal (APX3, APX4, APX5) isoforms. The APX3 protein …	Eubel 2008, Reumann 2009, peroxisome 2010
AT4G35090	CAT2 (CATALASE 2); catalase Encodes a peroxisomal catalase, highly expressed in bolts and leaves. mRNA expression patterns show circadian regulation with mRNA levels being high in the subjective early morning. Identical to Catalase-2 (CAT2) [Arabidopsis Thaliana] (GB:P25819;GB:O49615); similar to CAT1 (CATALASE 1), catalase [Arabidopsis thaliana] (TAIR:AT1G20630.1); similar to CAT3 (CATALASE 3), …	Eubel 2008, Reumann 2009, peroxisome 2010, prediction 2+
AT4G35370	transducin family protein / WD-40 repeat family protein similar to transducin family protein / WD-40 repeat family protein [Arabidopsis thaliana] (TAIR:AT4G18905.1); similar to hypothetical protein [Vitis vinifera] (GB:CAN70683.1); similar to Os01g0924300 [Oryza sativa (japonica cultivar-group)] (GB:NP_001045246.1); contains InterPro domain WD40 repeat-like (InterPro:IPR011046); contains InterPro…	prediction 2+
At4g36195	serine carboxypeptidase S28 family protein similar to serine-type peptidase [Arabidopsis thaliana] (TAIR:AT4G36190.1); similar to EDA2 (embryo sac development arrest 2), serine-type peptidase [Arabidopsis thaliana] (TAIR:AT2G18080.1); similar to unknown [Populus trichocarpa] (GB:ABK95760.1); similar to Os10g0511400 [Oryza sativa (japonica cultivar-group)] (GB:NP_001065039.1); contains InterPro do…	Lingner 2011
AT4G36240	zinc finger (GATA type) family protein Identical to GATA transcription factor 12 [Arabidopsis Thaliana] (GB:O65515); similar to zinc finger (GATA type) family protein [Arabidopsis thaliana] (TAIR:AT5G66320.2); similar to zinc finger (GATA type) family protein [Arabidopsis thaliana] (TAIR:AT5G66320.1); similar to unnamed protein product [Vitis vinifera] (GB:CAO48266.1); contains InterPro domain Zi…	prediction 2+
AT4G36370	unknown protein	prediction 2+
AT4G37890	EDA40 (embryo sac development arrest 40); protein binding / ubiquitin-protein ligase/ zinc ion binding similar to zinc finger (C3HC4-type RING finger) family protein [Arabidopsis thaliana] (TAIR:AT2G22680.1); similar to zinc finger protein [Medicago truncatula] (GB:ABY48131.1); contains InterPro domain von Willebrand factor, type A (InterPro:IPR002035); contains InterPro domain Zinc finger, RING-…	prediction 2+
AT4G39140	protein binding / zinc ion binding similar to protein binding / zinc ion binding [Arabidopsis thaliana] (TAIR:AT2G21500.1); similar to protein binding / zinc ion binding [Arabidopsis thaliana] (TAIR:AT2G21500.2); similar to unnamed protein product [Vitis vinifera] (GB:CAO47581.1); contains InterPro domain Zinc finger, RING-type; (InterPro:IPR001841)	prediction 2+
AT4G39660	AGT2 (ALANINE:GLYOXYLATE AMINOTRANSFERASE 2); alanine-glyoxylate transaminase alanine:glyoxylate aminotransferase 2 homolog (AGT2) mRNA, Identical to Alanine--glyoxylate aminotransferase 2 homolog 1, mitochondrial precursor (AGT2) [Arabidopsis Thaliana] (GB:Q940M2;GB:Q9SU41;GB:Q9SWE2); similar to alanine--glyoxylate aminotransferase, putative / beta-alanine-pyruvate aminotransferase, putative / A…	peroxisomes 2010, prediction 2+
At4g39850	PXA1 (PEROXISOMAL ABC TRANSPORTER 1) Encodes a peroxisomal protein of the ATP binding cassette (ABC) transporter class (PMP subfamily) with significant identity to the human X-linked adrenoleukodystrophy protein (ALDP). The gene product promotes germination and represses embryo dormancy. ABI3, ABA1, FUS3 and LEC1 are epistatic to this gene. Mutants accumulate fatty acyl CoA suggesting a defect in…	Eubel 2008, Reumann 2009, peroxisome 2010
AT5G03860	MLS (MALATE SYNTHASE); malate synthase Encodes a protein with malate synthase activity. similar to glyoxysomal malate synthase [Brassica napus] (GB:CAA73793.1); similar to Malate synthase, glyoxysomal (GB:P08216); similar to Malate synthase, glyoxysomal (GB:P13244); contains InterPro domain Malate synthase; (InterPro:IPR001465); contains InterPro domain Malate synthase A; (InterPro:IPR006252); co…	peroxisomes 2010, prediction 2+
AT5G03930	similar to unknown protein [Arabidopsis thaliana] (TAIR:AT5G03920.1)	prediction 2+
At5g04870	CPK1 (calcium-dependent protein kinase isoform AK1); calmodulin-dependent protein kinase/ kinase A calcium-dependent protein kinase that can phosphorylate phenylalanine ammonia lyase (PAL), a key enzyme in pathogen defense. Identical to Calcium-dependent protein kinase isoform AK1 (AK1) [Arabidopsis Thaliana] (GB:Q06850); similar to CPK20 (calcium-dependent protein kinase 20), calmodulin-dependen…	Lingner 2011, peroxisome 2010
At5g08470	PEX1 (PEROXISOME 1); ATPase an AAA-ATPase that is the probable Arabidopsis orthologue of one of the AAA-ATPases involved in peroxisome biogenesis in yeasts and mammals. similar to (Cell division control protein 48 homolog E), ATPase [Arabidopsis thaliana] (TAIR:AT5G03340.1); similar to putative peroxisome biogenesis protein PEX1 [Oryza sativa (japonica cultivar-group)] (GB:BAD09074.1); similar to…	peroxisome 2010
At5g09660	PMDH2 (PEROXISOMAL NAD-MALATE DEHYDROGENASE 2); malate dehydrogenase encodes a microbody NAD-dependent malate dehydrogenase encodes an peroxisomal NAD-malate dehydrogenase that is involved in fatty acid beta-oxidation through providing NAD to the process of converting fatty acyl CoA to acetyl CoA. Identical to Malate dehydrogenase, glyoxysomal precursor [Arabidopsis Thaliana] (GB:Q9ZP05); similar…	Eubel 2008, Reumann 2009, peroxisome 2010
At5g10730	binding / catalytic/ coenzyme binding similar to dehydrogenase-related [Arabidopsis thaliana] (TAIR:AT5G15910.1); similar to unnamed protein product [Vitis vinifera] (GB:CAO14555.1); contains InterPro domain NAD-dependent epimerase/dehydratase; (InterPro:IPR001509); contains InterPro domain NAD(P)-binding; (InterPro:IPR016040)	Eubel 2008
At5g11520	ASP3 (ASPARTATE AMINOTRANSFERASE 3) Encodes the chloroplastic isozyme of aspartate aminotransferase. Involved in aspartate biosynthesis and nitrogen metabolism. mRNA is expressed in senescing leaves. Identical to Aspartate aminotransferase, chloroplast precursor (ASP3) [Arabidopsis Thaliana] (GB:P46644); similar to ASP2 (ASPARTATE AMINOTRANSFERASE 2) [Arabidopsis thaliana] (TAIR:AT5G19550.1); sim…	Eubel 2008, Reumann 2009, peroxisome 2010
At5g11910	esterase/lipase/thioesterase family protein similar to esterase/lipase/thioesterase family protein [Arabidopsis thaliana] (TAIR:AT3G47590.1); similar to unnamed protein product [Vitis vinifera] (GB:CAO43817.1); contains domain SSF53474 (SSF53474); contains domain G3DSA:3.40.50.1820 (G3DSA:3.40.50.1820)	Reumann 2009 GFP, peroxisome 2010
AT5G12110	elongation factor 1B alpha-subunit 1 (eEF1Balpha1) Identical to Elongation factor 1-beta 1 [Arabidopsis Thaliana] (GB:Q84WM9;GB:Q9SCX2;GB:Q9SCX4); similar to elongation factor 1B alpha-subunit 2 (eEF1Balpha2) [Arabidopsis thaliana] (TAIR:AT5G19510.1); similar to unnamed protein product [Vitis vinifera] (GB:CAO67292.1); contains InterPro domain Translation elongation factor EF1B, beta/delta chains…	prediction 2+
At5g12390	binding similar to BIGYIN, binding [Arabidopsis thaliana] (TAIR:AT3G57090.1); similar to unknown [Populus trichocarpa] (GB:ABK93984.1); contains InterPro domain Tetratricopeptide-like helical; (InterPro:IPR011990); contains InterPro domain Tetratricopeptide TPR2 (InterPro:IPR013105); contains InterPro domain Tetratricopeptide repeat 11 Fission 1 protein (InterPro:IPR016543); contains InterPro dom…	peroxisome 2010
AT5G13070	MSF1-like family protein similar to unnamed protein product [Vitis vinifera] (GB:CAO21938.1); contains InterPro domain MSF1 (InterPro:IPR006797)	prediction 2+
AT5G15720	GLIP7 (GDSL-motif lipase 7); carboxylesterase Contains lipase signature motif and GDSL domain. similar to GDSL-motif lipase/hydrolase family protein [Arabidopsis thaliana] (TAIR:AT1G29670.1); similar to hypothetical protein [Cleome spinosa] (GB:ABD96893.1); contains InterPro domain Lipase, GDSL; (InterPro:IPR001087)	prediction 2+
AT5G16370	AMP-binding protein, putative similar to AMP-binding protein, putative [Arabidopsis thaliana] (TAIR:AT5G16340.1); similar to AMP-binding protein, putative [Arabidopsis thaliana] (TAIR:AT1G75960.1); similar to AMP-binding protein, putative [Arabidopsis thaliana] (TAIR:AT1G21540.1); similar to unnamed protein product [Vitis vinifera] (GB:CAO22162.1); similar to hypothetical protein [Vitis vinifera]…	prediction 2+
AT5G16760	inositol 1,3,4-trisphosphate 5/6-kinase Encodes a inositol 1,3,4-trisphosphate 5/6-kinase. Identical to Inositol-tetrakisphosphate 1-kinase 1 (ITPK1) [Arabidopsis Thaliana] (GB:Q9SBA5;GB:O81633); similar to inositol 1,3,4-trisphosphate 5/6-kinase family protein [Arabidopsis thaliana] (TAIR:AT4G08170.2); similar to unnamed protein product [Vitis vinifera] (GB:CAO62154.1); contains InterPro domain …	prediction 2+
At5g17550	PEROXIN 19-2/PEX19-2 similar to PEX19-1 (PEROXIN 19-1) [Arabidopsis thaliana] (TAIR:AT3G03490.1); similar to unnamed protein product [Vitis vinifera] (GB:CAO16473.1); contains InterPro domain Pex19 protein; (InterPro:IPR006708)	peroxisome 2010
AT5G17890	LIM domain-containing protein / disease resistance protein-related similar to disease resistance protein (TIR-NBS-LRR class), putative [Arabidopsis thaliana] (TAIR:AT4G36140.1); similar to TTR1 (WRKY domain family protein 16), transcription factor [Arabidopsis thaliana] (TAIR:AT5G45050.2); similar to TTR1 (WRKY domain family protein 16), transcription factor [Arabidopsis thaliana] (TAIR:AT5G45050…	prediction 2+
AT5G18100	CSD3 (COPPER/ZINC SUPEROXIDE DISMUTASE 3) A putative peroxisomal CuZnSOD inducible by a high-light pulse. similar to CSD1 (COPPER/ZINC SUPEROXIDE DISMUTASE 1) [Arabidopsis thaliana] (TAIR:AT1G08830.2); similar to CSD1 (COPPER/ZINC SUPEROXIDE DISMUTASE 1), copper, zinc superoxide dismutase [Arabidopsis thaliana] (TAIR:AT1G08830.1); similar to putative CuZn-superoxide dismutase [Populus tremula x P…	prediction 2+
AT5G19510	elongation factor 1B alpha-subunit 2 (eEF1Balpha2) Identical to Elongation factor 1-beta 2 [Arabidopsis Thaliana] (GB:Q9SCX3); similar to elongation factor 1B alpha-subunit 1 (eEF1Balpha1) [Arabidopsis thaliana] (TAIR:AT5G12110.1); similar to unknown [Populus trichocarpa] (GB:ABK92471.1); contains InterPro domain Translation elongation factor EF1B, beta/delta chains, conserved site; (InterPro:IPR…	prediction 2+
At5g20070	ATNUDT19 (Arabidopsis thaliana Nudix hydrolase homolog 19); hydrolase Identical to Probable NADH pyrophosphatase NUDT19, chloroplast precursor (NUDT19) [Arabidopsis Thaliana] (GB:Q94A82); similar to unnamed protein product [Vitis vinifera] (GB:CAO65631.1); contains InterPro domain NADH pyrophosphatase-like, N-terminal (InterPro:IPR015375); contains InterPro domain NUDIX hydrolase, core; (InterPro…	Lingner 2011
AT5G21040	F-box family protein / WD-40 repeat family protein Identical to F-box/WD-40 repeat-containing protein At5g21040 [Arabidopsis Thaliana] (GB:Q94AD8); similar to transducin family protein / WD-40 repeat family protein [Arabidopsis thaliana] (TAIR:AT2G43770.1); similar to unnamed protein product [Vitis vinifera] (GB:CAO67352.1); contains InterPro domain WD40 repeat-like (InterPro:IPR011046); contains…	prediction 2+
AT5G21970	similar to unknown protein [Arabidopsis thaliana] (TAIR:AT4G01037.1); similar to unnamed protein product [Vitis vinifera] (GB:CAO43911.1); contains InterPro domain Protein of unknown function DUF860, plant (InterPro:IPR008578)	prediction 2+
AT5G23050	acyl-activating enzyme 17 (AAE17) similar to ligase [Arabidopsis thaliana] (TAIR:AT1G55320.1); similar to hypothetical protein OsJ_028045 [Oryza sativa (japonica cultivar-group)] (GB:EAZ44562.1); similar to hypothetical protein OsI_030146 [Oryza sativa (indica cultivar-group)] (GB:EAZ08914.1); similar to unnamed protein product [Vitis vinifera] (GB:CAO67977.1); contains InterPro domain AMP-depend…	Eubel 2008, prediction 2+
At5g24400	EMB2024 (EMBRYO DEFECTIVE 2024); catalytic Identical to Probable 6-phosphogluconolactonase 5, chloroplast precursor (EMB2024) [Arabidopsis Thaliana] (GB:Q84WW2;GB:Q42135;GB:Q8LD77;GB:Q9FIN2); similar to glucosamine/galactosamine-6-phosphate isomerase family protein [Arabidopsis thaliana] (TAIR:AT3G49360.1); similar to unknown [Populus trichocarpa] (GB:ABK95228.1); contains InterPro domain Glucosa…	peroxisome 2010
At5g25760	PEX4 (PEROXIN4); ubiquitin-protein ligase mutant displays sucrose-dependent seedling development and reduced lateral root production. PEX4 interacts with PEX22 in a yeast two-hybrid. Necessary for peroxisome biogenesis. The PEX4 and PEX22 pair may be important during the remodeling of peroxisome matrix contents as glyoxysomes transition to leaf peroxisomes. similar to UBC9 (UBIQUITIN CONJUGATING …	peroxisome 2010
AT5G27470	seryl-tRNA synthetase / serine--tRNA ligase Identical to Seryl-tRNA synthetase [Arabidopsis Thaliana] (GB:Q39230); similar to AtSRS (OVULE ABORTION 7), serine-tRNA ligase [Arabidopsis thaliana] (TAIR:AT1G11870.2); similar to AtSRS (OVULE ABORTION 7), serine-tRNA ligase [Arabidopsis thaliana] (TAIR:AT1G11870.1); similar to hypothetical protein [Vitis vinifera] (GB:CAN77028.1); similar to unnamed p…	prediction 2+
At5g27520	mitochondrial substrate carrier family protein similar to mitochondrial substrate carrier family protein [Arabidopsis thaliana] (TAIR:AT3G05290.1); similar to mitochondrial FAD carrier [Cucumis melo] (GB:ABR67418.1); contains InterPro domain Mitochondrial substrate carrier; (InterPro:IPR001993); contains InterPro domain Mitochondrial carrier protein; (InterPro:IPR002067)	Eubel 2008, peroxisome 2010
AT5G27600	LACS7 (LONG-CHAIN ACYL-COA SYNTHETASE 7) Encode peroxisomal long-chain acyl-CoA synthetase. Activates fatty acids for further metabolism. Interacts with PEX5. similar to LACS6 (LONG-CHAIN ACYL-COA SYNTHETASE 6) [Arabidopsis thaliana] (TAIR:AT3G05970.1); similar to ACS2 [Ricinus communis] (GB:ABC02881.1); similar to unnamed protein product [Vitis vinifera] (GB:CAO71137.1); similar to ACS4 [Ricinus…	Eubel 2008, Reumann 2009, peroxisome 2010, prediction 2+
At5g28360	ACS3 (1-AMINOCYCLOPROPANE-1-CARBOXYLATE SYNTHASE LIKE PSEUDOGENE); 1-aminocyclopropane-1-carboxylate synthase a pseudogene belonging to the 1-aminocyclopropane-1-carboxylate (ACC) synthase (S-adenosyl-L-methionine methylthioadenosine-lyase, EC 4.4.1.14) gene family. Transcript has not been detected. similar to ACS1 (ACC SYNTHASE 1), 1-aminocyclopropane-1-carboxylate synthase [Arabidopsis thaliana…	Lingner 2011
AT5G33340	CDR1 (CONSTITUTIVE DISEASE RESISTANCE 1); aspartic-type endopeptidase/ pepsin A Encodes a protein with aspartic protease activity (also known as aspartate-type endopeptidase activity). Overexpression of the gene was shown to lead to salicylic acid (SA)-mediated disease resistance upon exposure to the pathogen Pseudomonas syringae. Moreover, overexpression of this gene led to the upregulation of t…	prediction 2+
AT5G36200	F-box family protein Identical to Putative F-box protein At5g36200 [Arabidopsis Thaliana] (GB:Q9FHK1); similar to F-box family protein [Arabidopsis thaliana] (TAIR:AT5G36730.1); similar to F-box family protein [Arabidopsis thaliana] (TAIR:AT5G36820.1); similar to hypothetical protein 25.t00068 [Brassica oleracea] (GB:ABD64961.1); contains InterPro domain Cyclin-like F-box (InterPro:IPR001810); co…	prediction 2+
AT5G36840	similar to unknown protein [Arabidopsis thaliana] (TAIR:AT3G24380.1); similar to hypothetical protein 40.t00047 [Brassica oleracea] (GB:ABD65162.1); contains domain Hedgehog/intein (Hint) domain (SSF51294)	prediction 2+
AT5G37670	15.7 kDa class I-related small heat shock protein-like (HSP15.7-CI) similar to 17.6 kDa class I heat shock protein (HSP17.6A-CI) [Arabidopsis thaliana] (TAIR:AT1G59860.1); similar to hypothetical protein [Vitis vinifera] (GB:CAN65698.1); contains InterPro domain HSP20-like chaperone (InterPro:IPR008978); contains InterPro domain Heat shock protein Hsp20 (InterPro:IPR002068)	peroxisomes 2010, prediction 2+
AT5G38000	NADP-dependent oxidoreductase, putative similar to NADP-dependent oxidoreductase, putative [Arabidopsis thaliana] (TAIR:AT5G37940.1); similar to NADP-dependent oxidoreductase, putative [Arabidopsis thaliana] (TAIR:AT5G37980.1); similar to hypothetical protein [Vitis vinifera] (GB:CAN61471.1); contains InterPro domain NAD(P)-binding; (InterPro:IPR016040); contains InterPro domain GroES-like (Inter…	prediction 2+
AT5G41210	ATGSTT1 (Arabidopsis thaliana Glutathione S-transferase (class theta) 1); glutathione transferase Encodes glutathione transferase belonging to the theta class of GSTs. Naming convention according to Wagner et al. (2002). similar to ATGSTT3 (Arabidopsis thaliana Glutathione S-transferase (class theta) 3), glutathione transferase [Arabidopsis thaliana] (TAIR:AT5G41220.1); similar to unnamed protein…	Eubel 2008, Reumann 2009, peroxisome 2010, prediction 2+
At5g41220	ATGSTT3 (Arabidopsis thaliana Glutathione S-transferase (class theta) 3); glutathione transferase Encodes glutathione transferase belonging to the theta class of GSTs. Naming convention according to Wagner et al. (2002). similar to ATGSTT2 (Arabidopsis thaliana Glutathione S-transferase (class theta) 2), glutathione transferase [Arabidopsis thaliana] (TAIR:AT5G41240.1); similar to glutathione S-t…	peroxisome 2010
At5g41240	ATGSTT2 (Arabidopsis thaliana Glutathione S-transferase (class theta) 2); glutathione transferase Encodes glutathione transferase belonging to the theta class of GSTs. Naming convention according to Wagner et al. (2002). similar to ATGSTT3 (Arabidopsis thaliana Glutathione S-transferase (class theta) 3), glutathione transferase [Arabidopsis thaliana] (TAIR:AT5G41220.1); similar to glutathione S-t…	peroxisome 2010
AT5G42890	sterol carrier protein 2 (SCP-2) family protein similar to hypothetical protein [Vitis vinifera] (GB:CAN82147.1); contains InterPro domain Short-chain dehydrogenase/reductase SDR; (InterPro:IPR002198); contains InterPro domain Sterol-binding; (InterPro:IPR003033); contains InterPro domain Sterol-binding-like (InterPro:IPR016083)	prediction 2+
AT5G43280	ATDCI1 (DELTA(3,5),DELTA(2,4)-DIENOYL-COA ISOMERASE 1); delta3,5-delta2,4-dienoyl-CoA isomerase/ enoyl-CoA hydratase Encodes the peroxisomal delta 3,5-delta2,4-dienoyl-CoA isomerase, a enzyme involved in degradation of unsaturated fatty acids. Gene expression is induced upon seed germination. similar to enoyl-CoA hydratase, putative [Arabidopsis thaliana] (TAIR:AT4G16800.1); similar to unnamed pr…	Eubel 2008, Reumann 2009, peroxisome 2010, prediction 2+
AT5G44250	similar to unknown protein [Arabidopsis thaliana] (TAIR:AT2G15695.1); similar to unnamed protein product [Vitis vinifera] (GB:CAO61325.1); contains InterPro domain Protein of unknown function DUF829, eukaryotic (InterPro:IPR008547)	Reumann 2009 GFP, peroxisome 2010, prediction 2+
AT5G45000	transmembrane receptor similar to unknown protein [Arabidopsis thaliana] (TAIR:AT1G51270.2); similar to unknown [Arabidopsis lyrata] (GB:AAO42473.1); contains InterPro domain Toll-Interleukin receptor; (InterPro:IPR000157)	prediction 2+
AT5G46670	CHP-rich zinc finger protein, putative similar to DC1 domain-containing protein [Arabidopsis thaliana] (TAIR:AT5G55780.1); similar to DC1 domain-containing protein [Brassica oleracea] (GB:ABD65623.1); contains InterPro domain C1-like (InterPro:IPR011424); contains InterPro domain Zinc finger, RING-type; (InterPro:IPR001841)	prediction 2+
AT5G47040	Lon protease homolog 1, mitochondrial (LON) Identical to Lon protease homolog 1, mitochondrial precursor (LON) [Arabidopsis Thaliana] (GB:O64948); similar to LON_ARA_ARA (Lon protease homolog gene), ATP binding / ATP-dependent peptidase/ serine-type peptidase [Arabidopsis thaliana] (TAIR:AT5G26860.1); similar to Lon protease [Dichanthelium lanuginosum] (GB:AAK62365.1); similar to Lon protease [Or…	Reumann 2009 GFP, peroxisome 2010, prediction 2+
AT5G47430	similar to unknown protein [Arabidopsis thaliana] (TAIR:AT4G17410.1); similar to hypothetical protein 31.t00039 [Brassica oleracea] (GB:ABD65123.1); similar to hypothetical protein [Vitis vinifera] (GB:CAN68806.1); similar to hypothetical protein 24.t00020 [Brassica oleracea] (GB:ABD64942.1); contains InterPro domain DWNN domain (InterPro:IPR014891); contains InterPro domain Zinc finger, RING/FYV…	prediction 2+
At5g47720	acetyl-CoA C-acyltransferase, putative / 3-ketoacyl-CoA thiolase, putative Identical to Probable acetyl-CoA acetyltransferase, cytosolic 2 [Arabidopsis Thaliana] (GB:Q9FIK7;GB:Q3E710;GB:Q3E8F1); similar to ACAT2/EMB1276 (ACETOACETYL-COA THIOLASE 2), acetyl-CoA C-acetyltransferase [Arabidopsis thaliana] (TAIR:AT5G48230.1); similar to ACAT2/EMB1276 (ACETOACETYL-COA THIOLASE 2), acetyl-CoA C-acetylt…	peroxisome 2010
At5g48545	histidine triad family protein / HIT family protein similar to zinc-binding protein, putative / protein kinase C inhibitor, putative [Arabidopsis thaliana] (TAIR:AT1G31160.1); similar to unnamed protein product [Vitis vinifera] (GB:CAO22246.1); contains InterPro domain Histidine triad (HIT) protein (InterPro:IPR001310); contains InterPro domain Histidine triad-like motif; (InterPro:IPR011146); co…	Reumann 2009 GFP, peroxisome 2010
At5g48880	KAT5/PKT1/PKT2 (PEROXISOMAL 3-KETO-ACYL-COA THIOLASE 1, PEROXISOMAL 3-KETO-ACYL-COA THIOLASE 2); acetyl-CoA C-acyltransferase Encodes a peroxisomal 3-keto-acyl-CoA thiolase 2 precursor. Identical to 3-ketoacyl-CoA thiolase 5, peroxisomal precursor (KAT5) [Arabidopsis Thaliana] (GB:Q570C8;GB:O65339;GB:Q9S774); similar to KAT2/PED1 (PEROXISOME DEFECTIVE 1), acetyl-CoA C-acyltransferase [Arabidopsis…	Reumann 2009, peroxisome 2010
AT5G48950	thioesterase family protein similar to thioesterase family protein [Arabidopsis thaliana] (TAIR:AT1G48320.1); similar to unnamed protein product [Vitis vinifera] (GB:CAO70944.1); contains InterPro domain Phenylacetic acid degradation-related protein (InterPro:IPR003736); contains InterPro domain Thioesterase superfamily (InterPro:IPR006683)	prediction 2+
AT5G52150	zinc finger (C3HC4-type RING finger) family protein similar to protein binding / zinc ion binding [Arabidopsis thaliana] (TAIR:AT5G52140.1); similar to predicted protein [Physcomitrella patens subsp. patens] (GB:EDQ65620.1); contains InterPro domain Zinc finger, RING/FYVE/PHD-type (InterPro:IPR013083); contains InterPro domain Zinc finger, RING-type; (InterPro:IPR001841)	prediction 2+
AT5G53750	similar to CBS domain-containing protein [Arabidopsis thaliana] (TAIR:AT4G27460.1); similar to unnamed protein product [Vitis vinifera] (GB:CAO16914.1); contains InterPro domain Cystathionine beta-synthase, core (InterPro:IPR000644)	prediction 2+
AT5G54660	heat shock protein-related similar to 17.6 kDa class I small heat shock protein (HSP17.6C-CI) (AA 1-156) [Arabidopsis thaliana] (TAIR:AT1G53540.1); similar to heat shock protein [Corchorus olitorius] (GB:ABU63401.1); contains InterPro domain HSP20-like chaperone (InterPro:IPR008978); contains InterPro domain Heat shock protein Hsp20 (InterPro:IPR002068)	prediction 2+
AT5G56220	nucleoside-triphosphatase/ nucleotide binding similar to nucleoside-triphosphatase/ nucleotide binding / transmembrane receptor [Arabidopsis thaliana] (TAIR:AT4G23440.1); similar to hypothetical protein OsJ_026702 [Oryza sativa (japonica cultivar-group)] (GB:EAZ43219.1); similar to unnamed protein product [Vitis vinifera] (GB:CAO66844.1); similar to hypothetical protein OsI_028728 [Oryza sativa (…	prediction 2+
At5g56290	PEX5 (PEROXIN 5); peroxisome matrix targeting signal-1 binding Encodes the peroxisomal targeting signal type 1 receptor that facilitates peroxisomal protein translocation. It recognizes proteins with the PTS1 consensus sequence (tripeptide SKL or a conserved variant) at the extreme C terminus. The protein has several domains, including C-terminal tetratricopeptide repeat motifs which act in bindi…	peroxisome 2010
AT5G56310	pentatricopeptide (PPR) repeat-containing protein similar to pentatricopeptide (PPR) repeat-containing protein [Arabidopsis thaliana] (TAIR:AT2G20540.1); similar to unnamed protein product [Vitis vinifera] (GB:CAO22132.1); contains InterPro domain Pentatricopeptide repeat (InterPro:IPR002885)	prediction 2+
AT5G56430	F-box family protein Identical to Putative FBD-associated F-box protein At5g56430 [Arabidopsis Thaliana] (GB:Q9FM88); similar to F-box family protein [Arabidopsis thaliana] (TAIR:AT5G56440.1); similar to unnamed protein product [Vitis vinifera] (GB:CAO63564.1); contains InterPro domain Leucine-rich repeat 2 (InterPro:IPR013101); contains InterPro domain FBD (InterPro:IPR013596); contains InterPro…	prediction 2+
AT5G58010	basic helix-loop-helix (bHLH) family protein similar to basic helix-loop-helix (bHLH) family protein [Arabidopsis thaliana] (TAIR:AT2G24260.1); similar to hypothetical protein [Vitis vinifera] (GB:CAN75431.1); contains InterPro domain Basic helix-loop-helix dimerisation region bHLH; (InterPro:IPR001092); contains InterPro domain Helix-loop-helix DNA-binding; (InterPro:IPR011598)	prediction 2+
At5g58220	TTL (TRANSTHYRETIN-LIKE PROTEIN); steroid binding Identical to Bifunctional hydroxyisourate hydrolase/2-oxo-4-hydroxy-4-carboxy-5- ureidoimidazoline decarboxylase (TTL) [Arabidopsis Thaliana] (GB:Q9LVM5;GB:Q2V2X6;GB:Q2V2X7); similar to unnamed protein product [Vitis vinifera] (GB:CAO23132.1); contains InterPro domain Uncharacterised conserved protein UCP037178, transthyretin (InterPro:IPR017129);…	Eubel 2008, Reumann 2009, peroxisome 2010
AT5G58450	binding similar to hypothetical protein OsI_018849 [Oryza sativa (indica cultivar-group)] (GB:EAY97616.1); similar to unnamed protein product [Vitis vinifera] (GB:CAO21372.1); similar to Os05g0345400 [Oryza sativa (japonica cultivar-group)] (GB:NP_001055256.1); contains InterPro domain Tetratricopeptide-like helical; (InterPro:IPR011990); contains InterPro domain Tetratricopeptide TPR2 (InterPro:…	prediction 2+
AT5G59360	unknown protein	prediction 2+
At5g62810	PEX14 (PEROXISOME DEFECTIVE 2) mutant has a defect in the intracellular transport of thiolase from the cytosol to glyoxysomes (formerly known as ped2) similar to seven in absentia (SINA) family protein [Arabidopsis thaliana] (TAIR:AT5G62800.1); similar to hypothetical protein [Vitis vinifera] (GB:CAN67215.1); contains InterPro domain Peroxisome membrane anchor protein Pex14p, N-terminal; (InterPr…	Eubel 2008, Reumann 2009, peroxisome 2010
AT5G62920	ARR6 (RESPONSE REGULATOR 6); transcription regulator/ two-component response regulator Encodes a Type-A response regulator that is responsive to cytokinin treatment. Its C-ter domain is very short in comparison to other Arabidopsis ARRs (17 total). Arr6 protein is stabilized by cytokinin. Identical to Two-component response regulator ARR6 (ARR6) [Arabidopsis Thaliana] (GB:Q9ZWS6;GB:Q9ZWS8); simil…	prediction 2+
At5g63380	4-coumarate--CoA ligase family protein / 4-coumaroyl-CoA synthase family protein Encodes a peroxisomal protein involved in the activation of fatty acids through esterification with CoA. At5g63380 preferentially activates fatty acids with increased chain length (C9:0 to C8:0) and thus shares characteristics with long-chain fatty acyl-CoA synthases. Also able to catalyze the conversion of OPDA to i…	Reumann 2009, peroxisome 2010
At5g65110	ACX2 (ACYL-COA OXIDASE 2); acyl-CoA oxidase Encodes an acyl-CoA oxidase presumably involved in long chain fatty acid biosynthesis. Identical to Acyl-coenzyme A oxidase 2, peroxisomal precursor (ACX2) [Arabidopsis Thaliana] (GB:O65201;GB:Q9FJQ4); similar to ACX6 (ACYL-COA OXIDASE 6), acyl-CoA oxidase [Arabidopsis thaliana] (TAIR:AT1G06310.1); similar to ACX3 (ACYL-COA OXIDASE 3), acyl-CoA oxidase …	Reumann 2009, peroxisome 2010
At5g65400	similar to unknown protein [Arabidopsis thaliana] (TAIR:AT4G24380.1); similar to unknown [Populus trichocarpa] (GB:ABK94545.1); contains InterPro domain Protein of unknown function DUF341 (InterPro:IPR005645)	Reumann 2009 GFP, peroxisome 2010
AT5G65940	CHY1 (BETA-HYDROXYISOBUTYRYL-COA HYDROLASE 1); 3-hydroxyisobutyryl-CoA hydrolase hydrolyzes beta-hydroxyisobutyryl-CoA similar to 3-hydroxyisobutyryl-coenzyme A hydrolase, putative / CoA-thioester hydrolase, putative [Arabidopsis thaliana] (TAIR:AT2G30660.1); similar to unnamed protein product [Vitis vinifera] (GB:CAO62703.1); contains InterPro domain Crotonase, core; (InterPro:IPR001753)	Eubel 2008, Reumann 2009, peroxisome 2010, prediction 2+
AT5G67040	similar to unknown protein [Arabidopsis thaliana] (TAIR:AT5G55440.1); contains InterPro domain Protein of unknown function DUF295 (InterPro:IPR005174)	prediction 2+

## Sheet: Plastid
AT1G01080	33 kDa ribonucleoprotein, chloroplast, putative / RNA-binding protein cp33, putative similar to CP33 (PIGMENT DEFECTIVE 322), RNA binding [Arabidopsis thaliana] (TAIR:AT3G52380.1); similar to 31 kDa ribonucleoprotein, chloroplast, putative / RNA-binding protein RNP-T, putative / RNA-binding protein 1/2/3, putative / RNA-binding protein cp31, putative [Arabidopsis thaliana] (TAIR:AT5G50250.1); sim…	experimental + predicted		Plastid protein sources:
AT1G01090	PDH-E1 ALPHA (PYRUVATE DEHYDROGENASE E1 ALPHA); pyruvate dehydrogenase (acetyl-transferring) pyruvate dehydrogenase E1 alpha subunit similar to AT-E1 ALPHA (pyruvate dehydrogenase complex E1 alpha subunit), pyruvate dehydrogenase (acetyl-transferring) [Arabidopsis thaliana] (TAIR:AT1G59900.1); similar to unknown [Populus trichocarpa] (GB:ABK95003.1); contains InterPro domain Dehydrogenase, E1 com…	experimental + predicted		Yu et al., 2008 (used by Leister 2011)
AT1G01790	KEA1 (K EFFLUX ANTIPORTER 1); potassium:hydrogen antiporter K efflux antiporter KEA1 similar to KEA2 (K+ efflux antiporter), potassium:hydrogen antiporter [Arabidopsis thaliana] (TAIR:AT4G00630.1); similar to hypothetical protein OsJ_015941 [Oryza sativa (japonica cultivar-group)] (GB:EAZ32458.1); similar to H0124B04.17 [Oryza sativa (indica cultivar-group)] (GB:CAJ86300.1); similar to predicted …	50%+ MS		PPDB Van Wijk database
AT1G01950	armadillo/beta-catenin repeat family protein / kinesin motor family protein similar to PAK (PHOSPHATIDIC ACID KINASE), microtubule motor [Arabidopsis thaliana] (TAIR:AT1G12430.1); similar to unnamed protein product [Vitis vinifera] (GB:CAO24493.1); similar to hypothetical protein OsJ_019242 [Oryza sativa (japonica cultivar-group)] (GB:EAZ35759.1); similar to unnamed protein product [Vitis vinifer…	predicted 5+		SUBA GFP localisations
AT1G02020	nitroreductase family protein similar to unnamed protein product [Vitis vinifera] (GB:CAO24524.1); contains InterPro domain Nitroreductase; (InterPro:IPR000415)	50%+ MS		SUBA MS identifications (50% or more MS calls for plastid)
AT1G02140	HAP1/MAGO/MEE63 (MATERNAL EFFECT EMBRYO ARREST 63); protein binding Identical to Protein mago nashi homolog [Arabidopsis Thaliana] (GB:O23676); similar to unknown [Populus trichocarpa] (GB:ABK93059.1); similar to mago nashi-like protein 1 [Physalis pubescens] (GB:ABQ11262.1); contains InterPro domain Mago nashi protein; (InterPro:IPR004023)	50%+ MS		SUBA predictions (5 or more plastid predictions)
AT1G02150	pentatricopeptide (PPR) repeat-containing protein similar to pentatricopeptide (PPR) repeat-containing protein [Arabidopsis thaliana] (TAIR:AT4G02820.1); similar to unnamed protein product [Vitis vinifera] (GB:CAO70507.1); contains InterPro domain Tetratricopeptide-like helical; (InterPro:IPR011990); contains InterPro domain Pentatricopeptide repeat (InterPro:IPR002885)	50%+ MS
AT1G02170	LOL3 (LSD ONE LIKE 3); caspase/ cysteine-type endopeptidase Metacaspase AtMCP1b. Arginine/lysine-specific cysteine protease activity. Induces apoptosis in yeast. Contains Pfam profile PF00656: ICE-like protease (caspase) p20 domain similar to ATMC2 (METACASPASE 2), caspase [Arabidopsis thaliana] (TAIR:AT4G25110.1); similar to unknown [Populus trichocarpa] (GB:ABK95057.1); contains InterPro domain…	predicted 5+
AT1G02280	TOC33 (PLASTID PROTEIN IMPORT 1); GTP binding Encodes a GTP-binding GTP-ase. Component of the chloroplast protein import machinery. Required for import of POR B into plastids. Toc33 phosphorylation may not play an important role in vivo. similar to ATTOC34/OEP34 (Translocase of chloroplast 34) [Arabidopsis thaliana] (TAIR:AT5G05000.3); similar to ATTOC34/OEP34 (Translocase of chloroplast 34) [Ara…	50%+ MS
AT1G02470	similar to unknown protein [Arabidopsis thaliana] (TAIR:AT1G02475.1); similar to unnamed protein product [Vitis vinifera] (GB:CAO40177.1); contains InterPro domain Streptomyces cyclase/dehydrase (InterPro:IPR005031)	GFP
AT1G02475	similar to unknown protein [Arabidopsis thaliana] (TAIR:AT4G01883.1); similar to unnamed protein product [Vitis vinifera] (GB:CAO40177.1); contains InterPro domain Streptomyces cyclase/dehydrase (InterPro:IPR005031)	predicted 5+
AT1G02560	CLPP5 (NUCLEAR ENCODED CLP PROTEASE 1); endopeptidase Clp One of several nuclear-encoded ClpPs (caseinolytic protease). Contains a highly conserved catalytic triad of Ser-type proteases (Ser-His-Asp). The name reflects nomenclature described in Adam et. al (2001). Identical to ATP-dependent Clp protease proteolytic subunit 5, chloroplast precursor (CLPP5) [Arabidopsis Thaliana] (GB:Q9S834); simil…	experimental + predicted
AT1G02890	AAA-type ATPase family protein similar to AAA-type ATPase family protein [Arabidopsis thaliana] (TAIR:AT1G62130.1); similar to AAA-type ATPase family protein [Arabidopsis thaliana] (TAIR:AT4G24860.1); similar to AAA-type ATPase family protein [Arabidopsis thaliana] (TAIR:AT4G02480.1); similar to unnamed protein product [Vitis vinifera] (GB:CAO68283.1); similar to hypothetical protein OsJ_033404 […	predicted 5+
AT1G02910	LPA1 (LOW PSII ACCUMULATION1); binding Mutants defective in this gene were shown to have a reduced PSII content (overall reduction in the levels of several PSII subunits) and a disrupted grana stack structure. The N-terminal half of the protein contains two tetratricopeptide repeat (TPR) motifs that are arranged tandemly, each consisting of a 34-residue degenerate consensus sequence. The N-termin…	50%+ MS
AT1G02980	CUL2 (cullin 2); ubiquitin protein ligase binding encodes an Arabidopsis cullin similar to ATCUL1 (CULLIN 1) [Arabidopsis thaliana] (TAIR:AT4G02570.3); similar to ATCUL1 (CULLIN 1) [Arabidopsis thaliana] (TAIR:AT4G02570.2); similar to ATCUL1 (CULLIN 1) [Arabidopsis thaliana] (TAIR:AT4G02570.1); similar to unnamed protein product [Vitis vinifera] (GB:CAO70971.1); similar to cullin 1B [Nicotiana ta…	50%+ MS
AT1G03030	phosphoribulokinase/uridine kinase family protein similar to unnamed protein product [Vitis vinifera] (GB:CAO22636.1); contains InterPro domain Uridine kinase; (InterPro:IPR000764)	experimental + predicted
AT1G03130	PSAD-2 (photosystem I subunit D-2) Encodes a protein predicted by sequence similarity with spinach PsaD to be photosystem I reaction center subunit II (PsaD2) Identical to Photosystem I reaction center subunit II-2, chloroplast precursor (psaD2) [Arabidopsis Thaliana] (GB:Q9SA56;GB:Q9SUI3); similar to PSAD-1 (photosystem I subunit D-1) [Arabidopsis thaliana] (TAIR:AT4G02770.1); similar to PSI rea…	experimental + predicted
AT1G03160	FZL (FZO-LIKE); GTP binding / GTPase/ thiamin-phosphate diphosphorylase A new plant-specific member of the dynamin superfamily; defines a new protein class within the dynamin superfamily of membrane remodeling GTPases that regulates organization of the thylakoid network in plants. Targeted to chloroplasts and associated with thylakoid and envelope membranes as punctate structures. Knockout mutant…	experimental + predicted
AT1G03270	similar to unknown protein [Arabidopsis thaliana] (TAIR:AT4G14240.1); similar to unnamed protein product [Vitis vinifera] (GB:CAO22502.1); contains InterPro domain Cystathionine beta-synthase, core (InterPro:IPR000644); contains InterPro domain Protein of unknown function DUF21 (InterPro:IPR002550)	50%+ MS
AT1G03310	ATISA2/BE2/DBE1/ISA2 (DEBRANCHING ENZYME 1); alpha-amylase/ isoamylase Encodes a protein with strong similarity to isoamylase (EC:3.2.1.68) however lacks critical residues known to be important for activity. Appears to co localize with ISA1 in the chloroplast isoamylase complex. Mutations in this gene cause the loss of detectable isoamylase activity and the disruption of normal starch structure. …	experimental + predicted
AT1G03475	LIN2 (LESION INITIATION 2); coproporphyrinogen oxidase Encodes a protein (AtCPO-I) with coproporphyrinogen III oxidase activity. Identical to Coproporphyrinogen III oxidase, chloroplast precursor (CPX) [Arabidopsis Thaliana] (GB:Q9LR75;GB:Q546I5;GB:Q94JR5); similar to HEMF2, coproporphyrinogen oxidase [Arabidopsis thaliana] (TAIR:AT4G03205.2); similar to Coproporphyrinogen III oxidase, chloroplas…	experimental + predicted
AT1G03510	pentatricopeptide (PPR) repeat-containing protein similar to pentatricopeptide (PPR) repeat-containing protein [Arabidopsis thaliana] (TAIR:AT2G20540.1); similar to unnamed protein product [Vitis vinifera] (GB:CAO43510.1); similar to hypothetical protein [Vitis vinifera] (GB:CAN64813.1); contains InterPro domain Tetratricopeptide-like helical; (InterPro:IPR011990); contains InterPro domain Pentat…	predicted 5+
AT1G03600	photosystem II family protein similar to unknown [Populus trichocarpa x Populus deltoides] (GB:ABK96761.1)	experimental + predicted
AT1G03630	POR C (PROTOCHLOROPHYLLIDE OXIDOREDUCTASE); NADPH dehydrogenase/ oxidoreductase/ protochlorophyllide reductase Encodes for a protein with protochlorophyllide oxidoreductase activity. The enzyme is NADPH- and light-dependent. Identical to Protochlorophyllide reductase C, chloroplast precursor (PORC) [Arabidopsis Thaliana] (GB:O48741); similar to PORA (Protochlorophyllide reductase A), oxidoreducta…	experimental + predicted
AT1G03680	ATHM1 (Arabidopsis thioredoxin M-type 1); thiol-disulfide exchange intermediate encodes a chloroplast thioredoxin similar to prokaryotic thioredoxins. Identical to Thioredoxin M-type 1, chloroplast precursor [Arabidopsis Thaliana] (GB:O48737); similar to ATHM2 (Arabidopsis thioredoxin M-type 2), thiol-disulfide exchange intermediate [Arabidopsis thaliana] (TAIR:AT4G03520.1); similar to Thioredoxi…	experimental + predicted
AT1G03780	targeting protein-related similar to unknown protein [Arabidopsis thaliana] (TAIR:AT4G22860.1); similar to unnamed protein product [Vitis vinifera] (GB:CAO69775.1); contains InterPro domain Targeting for Xklp2 (InterPro:IPR009675)	50%+ MS
AT1G03830	guanylate-binding family protein similar to GTP binding / GTPase [Arabidopsis thaliana] (TAIR:AT5G46070.1); similar to hypothetical protein OsJ_018761 [Oryza sativa (japonica cultivar-group)] (GB:EAZ35278.1); contains InterPro domain Guanylate-binding protein, C-terminal; (InterPro:IPR003191); contains InterPro domain Guanylate-binding protein, N-terminal; (InterPro:IPR015894); contains InterPro …	50%+ MS
AT1G04420	aldo/keto reductase family protein similar to KAB1 (POTASSIUM CHANNEL BETA SUBUNIT), potassium channel [Arabidopsis thaliana] (TAIR:AT1G04690.1); similar to unnamed protein product [Vitis vinifera] (GB:CAO71416.1); contains InterPro domain Aldo/keto reductase; (InterPro:IPR001395)	experimental + predicted
AT1G04570	integral membrane transporter family protein similar to integral membrane transporter family protein [Arabidopsis thaliana] (TAIR:AT2G33280.1); similar to unnamed protein product [Vitis vinifera] (GB:CAO71502.1); contains InterPro domain Biopterin transport-related protein BT1; (InterPro:IPR004324); contains InterPro domain MFS general substrate transporter (InterPro:IPR016196)	predicted 5+
AT1G04620	coenzyme F420 hydrogenase family / dehydrogenase, beta subunit family similar to hypothetical protein OsI_010874 [Oryza sativa (indica cultivar-group)] (GB:EAY89641.1); similar to predicted protein [Physcomitrella patens subsp. patens] (GB:EDQ64780.1); similar to unnamed protein product [Vitis vinifera] (GB:CAO71522.1); contains InterPro domain Coenzyme F420 hydrogenase/dehydrogenase beta subunit…	50%+ MS
AT1G04760	ATVAMP726 (VESICLE-ASSOCIATED MEMBRANE PROTEIN) member of Synaptobrevin -like protein family Identical to Putative vesicle-associated membrane protein 726 (VAMP726) [Arabidopsis Thaliana] (GB:Q9MAS5); similar to ATVAMP725 (Arabidopsis thaliana vesicle-associated membrane protein 725) [Arabidopsis thaliana] (TAIR:AT2G32670.1); similar to unnamed protein product [Vitis vinifera] (GB:CAO68808.1); co…	50%+ MS
AT1G04860	UBP2 (UBIQUITIN-SPECIFIC PROTEASE 2); ubiquitin-specific protease Encodes a ubiquitin-specific protease. Identical to Ubiquitin carboxyl-terminal hydrolase 2 (UBP2) [Arabidopsis Thaliana] (GB:Q8W4N3;GB:Q9MAT4); similar to ubiquitin-specific protease 1, putative (UBP1) [Arabidopsis thaliana] (TAIR:AT2G32780.1); similar to hypothetical protein [Vitis vinifera] (GB:CAN67276.1); contains InterPro dom…	50%+ MS
AT1G05140	membrane-associated zinc metalloprotease, putative similar to membrane-associated zinc metalloprotease, putative [Arabidopsis thaliana] (TAIR:AT2G32480.1); similar to Os03g0579000 [Oryza sativa (japonica cultivar-group)] (GB:NP_001050547.1); similar to unnamed protein product [Vitis vinifera] (GB:CAO24003.1); contains InterPro domain Peptidase M50; (InterPro:IPR008915); contains InterPro domain P…	experimental + predicted
AT1G05190	EMB2394 (EMBRYO DEFECTIVE 2394); structural constituent of ribosome Identical to 50S ribosomal protein L6, chloroplast precursor (RPL6) [Arabidopsis Thaliana] (GB:O23049); similar to ribosomal protein L6 family protein [Arabidopsis thaliana] (TAIR:AT2G18400.1); similar to Os03g0751400 [Oryza sativa (japonica cultivar-group)] (GB:NP_001051292.1); similar to Os03g0356300 [Oryza sativa (japonica cul…	experimental + predicted
AT1G05385	photosystem II 11 kDa protein-related similar to unnamed protein product [Vitis vinifera] (GB:CAO71168.1)	50%+ MS
AT1G05530	UGT2/UGT75B2 (UDP-glucosyl transferase 75B2); UDP-glucosyltransferase/ UDP-glycosyltransferase/ abscisic acid glucosyltransferase/ transferase, transferring glycosyl groups Encodes a protein with glucosyltransferase activity with high sequence homology to UGT1 (AT1G05560). It belongs to an UGT subfamily that binds UDP-glucose but not UDP-glucuronate, UDP-galactose, or UDP-rhamnose as the glycosyl…	predicted 5+
AT1G05560	UGT1 (UDP-glucosyl transferase 75B1); UDP-glycosyltransferase/ transferase, transferring glycosyl groups A UDP-glucose transferase localized in the phragmoplast. It has been co-purified with the callose synthase complex and may transfer UDP-glucose from sucrose synthase to the callose synthase and thus help form a substrate channel for the synthesis of callose at the forming cell plate. Induced b…	predicted 5+
AT1G05580	ATCHX23 (CATION/H+ EXCHANGER 23); monovalent cation:proton antiporter member of Putative Na+/H+ antiporter family similar to ATCHX21 (CATION/H+ EXCHANGER 21) [Arabidopsis thaliana] (TAIR:AT2G31910.1); similar to unnamed protein product [Vitis vinifera] (GB:CAO42759.1); contains InterPro domain Sodium/hydrogen exchanger; (InterPro:IPR006153)	PPDB+Yu 2008
AT1G05610	APS2 (ADP-GLUCOSE PYROPHOSHORYLASE SMALL SUBUNIT 2); glucose-1-phosphate adenylyltransferase Encodes the small subunit of ADP-glucose pyrophosphorylase. The small subunit is the catalytic isoform responsible for ADP-glucose pyrophosphorylase activity. The presence of the small subunit is required for large subunit stability. Two isoforms of the small subunit (ApS1 and ApS2) have been described. A…	experimental + predicted
AT1G05750	PDE247 (PIGMENT DEFECTIVE 247) similar to pentatricopeptide (PPR) repeat-containing protein [Arabidopsis thaliana] (TAIR:AT2G20540.1); similar to unnamed protein product [Vitis vinifera] (GB:CAO67452.1); contains InterPro domain Pentatricopeptide repeat (InterPro:IPR002885)	GFP
AT1G05900	endonuclease-related similar to endonuclease-related [Arabidopsis thaliana] (TAIR:AT2G31450.1); similar to unnamed protein product [Vitis vinifera] (GB:CAO64783.1); contains InterPro domain DNA glycosylase; (InterPro:IPR011257); contains InterPro domain Helix-hairpin-helix DNA-binding, class 1; (InterPro:IPR003583); contains InterPro domain Helix-hairpin-helix motif; (InterPro:IPR000445); contain…	experimental + predicted
AT1G06130	GLX2-4 (GLYOXALASE 2-4); hydroxyacylglutathione hydrolase similar to GLX2-5 (GLYOXALASE 2-5), hydroxyacylglutathione hydrolase/ iron ion binding / zinc ion binding [Arabidopsis thaliana] (TAIR:AT2G31350.1); similar to unnamed protein product [Vitis vinifera] (GB:CAO16950.1); contains InterPro domain Beta-lactamase-like; (InterPro:IPR001279)	50%+ MS
AT1G06190	ATP binding / ATPase, coupled to transmembrane movement of ions, phosphorylative mechanism similar to ATP binding / ATPase, coupled to transmembrane movement of ions, phosphorylative mechanism [Arabidopsis thaliana] (TAIR:AT2G31150.1); similar to unnamed protein product [Vitis vinifera] (GB:CAO40622.1); contains InterPro domain ATPase, P-type, K/Mg/Cd/Cu/Zn/Na/Ca/Na/H-transporter; (InterPro:IPR00…	50%+ MS
AT1G06230	GTE4 (GLOBAL TRANSCRIPTION FACTOR GROUP E 4); DNA binding This gene is predicted to encode a bromodomain-containing protein. Plant lines expressing RNAi constructs targeted against GTE4 show some resistance to agrobacterium-mediated root transformation. similar to DNA-binding bromodomain-containing protein [Arabidopsis thaliana] (TAIR:AT1G17790.1); similar to unnamed protein product [Vitis vinife…	50%+ MS
AT1G06270	pentatricopeptide (PPR) repeat-containing protein similar to pentatricopeptide (PPR) repeat-containing protein [Arabidopsis thaliana] (TAIR:AT1G09900.1); similar to unnamed protein product [Vitis vinifera] (GB:CAO69832.1); contains InterPro domain Pentatricopeptide repeat (InterPro:IPR002885)	GFP
AT1G06380	ribosomal protein-related similar to 60S ribosomal protein-related [Arabidopsis thaliana] (TAIR:AT2G42650.1); similar to unnamed protein product [Vitis vinifera] (GB:CAO70027.1); similar to hypothetical protein [Vitis vinifera] (GB:CAN65947.1); contains InterPro domain Ribosomal protein L1; (InterPro:IPR002143)	50%+ MS
AT1G06430	FTSH8 (FtsH protease 8); ATP-dependent peptidase/ ATPase/ metallopeptidase/ zinc ion binding encodes a FtsH protease that is localized to the chloroplast similar to VAR2 (VARIEGATED 2), ATP-dependent peptidase/ ATPase/ metallopeptidase/ zinc ion binding [Arabidopsis thaliana] (TAIR:AT2G30950.1); similar to ATFTSH6/FTSH6 (FtsH protease 6), ATP-dependent peptidase/ ATPase/ metallopeptidase/ peptida…	experimental + predicted
AT1G06510	similar to unnamed protein product [Vitis vinifera] (GB:CAO70010.1)	predicted 5+
AT1G06680	PSBP-1 (OXYGEN-EVOLVING ENHANCER PROTEIN 2); poly(U) binding Encodes a 23 kD extrinsic protein that is part of photosystem II and participates in the regulation of oxygen evolution. Identical to Oxygen-evolving enhancer protein 2-1, chloroplast precursor (PSBP1) [Arabidopsis Thaliana] (GB:Q42029); similar to PSBP-2 (photosystem II subunit P-2), calcium ion binding [Arabidopsis thaliana] (TAIR:AT2…	experimental + predicted
AT1G06690	aldo/keto reductase family protein Identical to Uncharacterized oxidoreductase At1g06690, chloroplast precursor [Arabidopsis Thaliana] (GB:Q94A68;GB:Q9SHK7); similar to aldo/keto reductase family protein [Arabidopsis thaliana] (TAIR:AT5G53580.1); similar to unnamed protein product [Vitis vinifera] (GB:CAO69967.1); contains InterPro domain ABC transporter related; (InterPro:IPR003439); contains In…	experimental + predicted
AT1G06730	pfkB-type carbohydrate kinase family protein similar to pfkB-type carbohydrate kinase family protein [Arabidopsis thaliana] (TAIR:AT3G59480.1); similar to unnamed protein product [Vitis vinifera] (GB:CAO22662.1); contains InterPro domain Carbohydrate/purine kinase (InterPro:IPR011611)	predicted 5+
AT1G06800	lipase class 3 family protein similar to lipase class 3 family protein [Arabidopsis thaliana] (TAIR:AT2G30550.2); similar to lipase class 3 family protein [Arabidopsis thaliana] (TAIR:AT2G30550.1); similar to unnamed protein product [Vitis vinifera] (GB:CAO22638.1); similar to hypothetical protein [Vitis vinifera] (GB:CAN74039.1); contains InterPro domain Lipase, active site; (InterPro:IPR008262)…	experimental + predicted
AT1G06820	CRTISO (CAROTENOID ISOMERASE); carotenoid isomerase Encodes carotenoid isomerase. Catalyzes the isomerization of poly-cis-carotenoids to all-trans-carotenoids. Together with PDS and ZDS, CRTiso is required to complete the synthesis of lycopene from phytoene. Identical to Carotenoid isomerase, chloroplast precursor (CRTISO) [Arabidopsis Thaliana] (GB:Q9M9Y8); similar to amine oxidase family [Arabi…	50%+ MS
AT1G06950	ATTIC110/TIC110 (TRANSLOCON AT THE INNER ENVELOPE MEMBRANE OF CHLOROPLASTS 110) Encodes a protein thought to be a part of the translocon at the chloroplast inner envelope. Involved in protein import into the chloroplast and chloroplast biogenesis. similar to unnamed protein product [Vitis vinifera] (GB:CAO21338.1); similar to hypothetical protein [Vitis vinifera] (GB:CAN60839.1); similar to chlor…	experimental + predicted
AT1G07010	calcineurin-like phosphoesterase family protein similar to calcineurin-like phosphoesterase family protein [Arabidopsis thaliana] (TAIR:AT1G18480.1); similar to unnamed protein product [Vitis vinifera] (GB:CAO21376.1); contains InterPro domain Metallophosphoesterase; (InterPro:IPR004843)	predicted 5+
AT1G07040	similar to unknown protein [Arabidopsis thaliana] (TAIR:AT1G27030.1); similar to unnamed protein product [Vitis vinifera] (GB:CAO41035.1)	experimental + predicted
AT1G07120	similar to proline-rich family protein [Arabidopsis thaliana] (TAIR:AT4G18570.1); similar to unnamed protein product [Vitis vinifera] (GB:CAO21423.1)	50%+ MS
AT1G07140	SIRANBP (Ran-binding protein 1a); Ran GTPase binding Encodes a putative Ran-binding protein (siRanBP). Identical to Ran-binding protein 1 homolog a (RANBP1A) [Arabidopsis Thaliana] (GB:Q9LMK7;GB:O04149;GB:Q9XHS1); similar to RANBP1 (RAN BINDING PROTEIN 1) [Arabidopsis thaliana] (TAIR:AT5G58590.1); similar to unknown [Brassica rapa] (GB:ABB97039.1); contains InterPro domain Pleckstrin homology-typ…	50%+ MS
AT1G07160	protein phosphatase 2C, putative / PP2C, putative similar to protein phosphatase 2C, putative / PP2C, putative [Arabidopsis thaliana] (TAIR:AT2G30020.1); similar to protein phosphatase 2C [Medicago sativa] (GB:CAA72341.1); contains InterPro domain Protein phosphatase 2C-related; (InterPro:IPR001932); contains InterPro domain Protein phosphatase 2C; (InterPro:IPR015655); contains InterPro domain P…	predicted 5+
AT1G07320	RPL4 (ribosomal protein L4); poly(U) binding / structural constituent of ribosome encodes a plastid ribosomal protein L4 Identical to 50S ribosomal protein L4, chloroplast precursor (RPL4) [Arabidopsis Thaliana] (GB:O50061;GB:Q8LF27;GB:Q8VZS1;GB:Q9LNV1); similar to ribosomal protein L4 family protein [Arabidopsis thaliana] (TAIR:AT2G20060.1); similar to unnamed protein product [Vitis vinifera] (G…	experimental + predicted
AT1G07420	SMO2-2 (sterol 4-alpha-methyl-oxidase 2); C-4 methylsterol oxidase Arabidopsis thaliana sterol 4-alpha-methyl-oxidase mRNA similar to SMO2-1 (sterol 4-alpha-methyl-oxidase 1), C-4 methylsterol oxidase [Arabidopsis thaliana] (TAIR:AT2G29390.2); similar to putative sterol 4-alpha-methyl-oxidase [Gossypium arboreum] (GB:AAO13795.1); contains InterPro domain Sterol desaturase; (InterPro:IPR006088)	50%+ MS
AT1G07640	OBP2 (OBF BINDING PROTEIN 2); DNA binding / transcription factor A member of the DOF transcription factors. Prominently expressed in the phloem of leaves and other organs. Expression is induced by wounding, MeJA and insect feeding. Upregulates glucosinolate biosynthesis. Identical to Dof zinc finger protein DOF1.1 (DOF1.1) [Arabidopsis Thaliana] (GB:Q8L9V6;GB:Q8W4A2;GB:Q9LQN7;GB:Q9XGU6); similar …	50%+ MS
AT1G07700	thioredoxin family protein similar to ATTRX4 (thioredoxin H-type 4), thiol-disulfide exchange intermediate [Arabidopsis thaliana] (TAIR:AT1G19730.1); similar to unnamed protein product [Vitis vinifera] (GB:CAO61342.1); contains InterPro domain Thioredoxin family (InterPro:IPR015467); contains InterPro domain Thioredoxin-like fold (InterPro:IPR012336); contains InterPro domain Thioredoxin fold (In…	50%+ MS
AT1G07780	PAI1 (PHOSPHORIBOSYLANTHRANILATE ISOMERASE 1); phosphoribosylanthranilate isomerase Encodes phosphoribosylanthranilate isomerase which catalyzes the third step of the tryptophan biosynthetic pathway. Member of gene family. similar to PAI2 (PHOSPHORIBOSYLANTHRANILATE ISOMERASE 2), phosphoribosylanthranilate isomerase [Arabidopsis thaliana] (TAIR:AT5G05590.1); similar to unnamed protein product [Vi…	50%+ MS
AT1G07790	HTB1; DNA binding Identical to Histone H2B.1 [Arabidopsis Thaliana] (GB:Q9LQQ4;GB:Q8L950); similar to H2B/HTB2 (HISTONE H2B), DNA binding [Arabidopsis thaliana] (TAIR:AT5G22880.1); similar to hypothetical protein [Vitis vinifera] (GB:CAN78863.1); contains InterPro domain Histone-fold; (InterPro:IPR009072); contains InterPro domain Histone core; (InterPro:IPR007125); contains InterPro domain Histo…	50%+ MS
AT1G08070	pentatricopeptide (PPR) repeat-containing protein similar to pentatricopeptide (PPR) repeat-containing protein [Arabidopsis thaliana] (TAIR:AT2G29760.1); similar to unnamed protein product [Vitis vinifera] (GB:CAO41882.1); similar to hypothetical protein [Vitis vinifera] (GB:CAN70142.1); contains InterPro domain Pentatricopeptide repeat (InterPro:IPR002885)	GFP
AT1G08110	lactoylglutathione lyase, putative / glyoxalase I, putative Identical to Lactoylglutathione lyase [Arabidopsis Thaliana] (GB:Q8H0V3;GB:Q9LMZ7); similar to lactoylglutathione lyase, putative / glyoxalase I, putative [Arabidopsis thaliana] (TAIR:AT1G67280.1); similar to lactoylglutathione lyase, putative / glyoxalase I, putative [Arabidopsis thaliana] (TAIR:AT1G67280.2); similar to glyoxalase I [Ar…	50%+ MS
AT1G08230	amino acid transporter family protein, low similarity to amino acid permease (Oryza sativa) GI:7415521 contains Pfam profile PF01490: Transmembrane amino acid transporter protein	50%+ MS
AT1G08250	ADT6 (AROGENATE DEHYDRATASE 6); arogenate dehydratase/ prephenate dehydratase similar to PD1 (PREPHENATE DEHYDRATASE 1), arogenate dehydratase/ prephenate dehydratase [Arabidopsis thaliana] (TAIR:AT2G27820.1); similar to unknown [Populus trichocarpa] (GB:ABK95815.1); contains InterPro domain Prephenate dehydratase; (InterPro:IPR001086)	GFP
AT1G08380	PSAO (photosystem I subunit O) Encodes subunit O of photosystem I. similar to putative 16kDa membrane protein [Nicotiana tabacum] (GB:CAB75430.1)	experimental + predicted
AT1G08490	ATCPNIFS/ATNFS2/ATSUFS/CPNIFS/SUFS (CHLOROPLASTIC NIFS-LIKE CYSTEINE DESULFURASE); cysteine desulfurase/ selenocysteine lyase/ transaminase Chloroplastic NifS-like protein that can catalyze the conversion of cysteine into alanine and elemental sulfur (S(0)) and of selenocysteine into alanine and elemental Se (Se(0)). Overexpression enhances selenium tolerance and accumulation. Identical to Cystei…	experimental + predicted
AT1G08510	FATB (FATTY ACYL-ACP THIOESTERASES B); acyl carrier/ acyl-ACP thioesterase Encodes an acyl-acyl carrier protein thioesterase. Hydrolyzes primarily saturated acyl-ACPs with chain lengths that vary between 8 and 18 carbons. Involved in saturated fatty acid synthesis. Nuclear-encoded, plastid-targeted globular protein that is functional as dimer. similar to ATFATA (ARABIDOPSIS FATA ACYL-ACP THIOESTE…	predicted 5+
AT1G08520	CHLD/PDE166 (PIGMENT DEFECTIVE 166); magnesium chelatase/ nucleoside-triphosphatase/ nucleotide binding Identical to Magnesium-chelatase subunit chlD, chloroplast precursor (CHLD) [Arabidopsis Thaliana] (GB:Q9SJE1;GB:Q8VZU7;GB:Q9SWY5); similar to CHLI1 (CHLORINA 42), magnesium chelatase [Arabidopsis thaliana] (TAIR:AT4G18480.1); similar to Magnesium-chelatase subunit chlD, chloroplast precursor (…	experimental + predicted
AT1G08530	similar to unknown protein [Arabidopsis thaliana] (TAIR:AT5G09995.3); similar to unknown protein [Arabidopsis thaliana] (TAIR:AT5G09995.2); similar to unnamed protein product [Vitis vinifera] (GB:CAO70794.1)	50%+ MS
AT1G08540	SIGB (SIGMA FACTOR B); DNA binding / DNA-directed RNA polymerase/ transcription factor Subunit of chloroplast RNA polymerase, confers the ability to recognize promoter sequences on the core enzyme similar to SIGF (RNA POLYMERASE SIGMA-70 FACTOR), DNA binding / DNA-directed RNA polymerase/ transcription factor [Arabidopsis thaliana] (TAIR:AT2G36990.1); similar to sigma factor 2 [Sinapis alba] (GB:…	experimental + predicted
AT1G08550	NPQ1 (NON-PHOTOCHEMICAL QUENCHING 1) Violaxanthin deepoxidase involved in xanthophyll cycle.Two major consequences of the npq1 mutation are the absence of zeaxanthin formation in strong light and the partial inhibition of the quenching of singlet excited chlorophylls in the photosystem II light-harvesting complex Identical to Violaxanthin de-epoxidase, chloroplast precursor (VDE1) [Arabidopsis Th…	50%+ MS
AT1G08640	heat shock protein binding similar to unnamed protein product [Vitis vinifera] (GB:CAO65063.1); contains InterPro domain Heat shock protein DnaJ, N-terminal; (InterPro:IPR001623)	experimental + predicted
AT1G08890	sugar transporter family protein Identical to Sugar transporter ERD6-like 1 (SUGTL4) [Arabidopsis Thaliana] (GB:Q9SCW7;GB:O04041); similar to unknown protein [Arabidopsis thaliana] (TAIR:AT1G08900.2); similar to carbohydrate transmembrane transporter [Arabidopsis thaliana] (TAIR:AT1G08900.1); similar to unknown protein [Arabidopsis thaliana] (TAIR:AT1G08900.3); similar to unnamed protein product …	50%+ MS
AT1G09130	ATP-dependent Clp protease proteolytic subunit, putative Identical to ATP-dependent Clp protease proteolytic subunit-related protein 3, chloroplast precursor (CLPR3) [Arabidopsis Thaliana] (GB:Q8L770;GB:O04018;GB:Q67XY5;GB:Q680D2); similar to CLPR1 (Clp protease proteolytic subunit 5), endopeptidase Clp [Arabidopsis thaliana] (TAIR:AT1G49970.1); similar to unnamed protein product [Vitis vinifera]…	experimental + predicted
AT1G09180	ATSAR1/ATSARA1A (ARABIDOPSIS THALIANA SECRETION-ASSOCIATED RAS SUPER FAMILY 1); GTP binding A member of ARF-like GTPase family. A thaliana has 21 members, in two subfamilies, ARF and ARF-like (ARL) GTPases. similar to SAR1 (SECRETION-ASSOCIATED RAS), GTP binding [Arabidopsis thaliana] (TAIR:AT1G56330.1); similar to unnamed protein product [Vitis vinifera] (GB:CAO44889.1); contains InterPro domain…	50%+ MS
AT1G09200	histone H3 Identical to Histone H3.2 (HTR1) [Arabidopsis Thaliana] (GB:P59226); similar to histone H3 [Arabidopsis thaliana] (TAIR:AT5G10390.1); similar to histone H3 [Arabidopsis thaliana] (TAIR:AT5G65360.1); similar to histone H3 [Arabidopsis thaliana] (TAIR:AT5G10400.1); similar to Histone H3.2 (GB:P68427); similar to histone H3 (H3-1.1) (GB:AAA32655.1); similar to histone 3 (GB:AAA33907.1); c…	50%+ MS
AT1G09310	similar to unknown protein [Arabidopsis thaliana] (TAIR:AT1G56580.1); similar to unknown [Populus trichocarpa] (GB:ABK94207.1); contains InterPro domain Protein of unknown function DUF538 (InterPro:IPR007493)	50%+ MS
AT1G09340	CRB; binding / catalytic/ coenzyme binding Encodes CHLOROPLAST RNA BINDING (CRB), a putative RNA-binding protein. CRB is important for the proper functioning of the chloroplast. Mutations in CRB also affects the circadian system, altering the expression of both oscillator and output genes. Identical to Uncharacterized protein At1g09340, chloroplast precursor [Arabidopsis Thaliana] (GB:Q9SA52;GB:O…	experimental + predicted
AT1G09390	GDSL-motif lipase/hydrolase family protein similar to GDSL-motif lipase/hydrolase family protein [Arabidopsis thaliana] (TAIR:AT1G56670.1); similar to unnamed protein product [Vitis vinifera] (GB:CAO17380.1); contains InterPro domain Lipase, GDSL; (InterPro:IPR001087)	50%+ MS
AT1G09420	G6PD4 (GLUCOSE-6-PHOSPHATE DEHYDROGENASE 4); glucose-6-phosphate dehydrogenase Encodes a protein similar to glucose-6-phosphate dehydrogenase but, based on amino acid differences in the active site and lack of activity, does not encode a functional G6PDH. The amino acid sequence for the consensus sequence of the G6PDH active site (DHYLGKE) differs in three places in this protein. gc exon splice s…	predicted 5+
AT1G09430	ACLA-3 (ATP-citrate lyase A-3) Encodes subunit A of the heteromeric enzyme ATP citrate lyase (ACL). In animals, ACL is encoded by a single gene; ACL in Arabidopsis is composed of two polypeptides, ACLA (encoded by 3 genes) and ACLB (encoded by 2 genes). The holoenzyme has an A(4)B(4)stoichiometry. Expression of both ACLA and ACLB but not of either of the subunits alone results in ACL activity. si…	50%+ MS
AT1G09795	ATATP-PRT2 (ATP PHOSPHORIBOSYL TRANSFERASE 2); ATP phosphoribosyltransferase ATP phosphoribosyl transferase, catalyses first step of histidine biosynthesis similar to ATATP-PRT1 (ATP PHOSPHORIBOSYL TRANSFERASE) [Arabidopsis thaliana] (TAIR:AT1G58080.1); similar to chloroplast ATP phosphoribosyl transferase [Alyssum montanum] (GB:AAT74598.1); similar to chloroplast ATP phosphoribosyl transferase […	experimental + predicted
AT1G09830	phosphoribosylamine--glycine ligase (PUR2) glycinamide ribonucleotide synthetase (GAR synthetase) that catalyzes the conversion of phosphoribosyl amine to phosphoribosyl glycineamide Identical to Phosphoribosylamine--glycine ligase, chloroplast precursor (PUR2) [Arabidopsis Thaliana] (GB:P52420;GB:O04505); similar to hypothetical protein OsI_036507 [Oryza sativa (indica cultivar-group)] (GB:EAY82…	experimental + predicted
AT1G09940	HEMA2; glutamyl-tRNA reductase Encodes glutamyl-tRNA reductase. Involved in heme biosynthesis in non-photosynthetic tissues and induced by oxidative stress in photosynthetic tissues to supply heme for defensive hemoproteins Identical to Glutamyl-tRNA reductase 2, chloroplast precursor (HEMA2) [Arabidopsis Thaliana] (GB:P49294;GB:O04950;GB:Q0WQP1;GB:Q4V3B7); similar to HEMA3, glutamyl-tRNA reducta…	experimental + predicted
AT1G10070	ATBCAT-2; branched-chain-amino-acid transaminase/ catalytic Encodes a chloroplast branched-chain amino acid aminotransferase. Complements the yeast leu/iso-leu/val auxotrophy mutant. Identical to Branched-chain-amino-acid aminotransferase 2, chloroplast precursor (BCAT2) [Arabidopsis Thaliana] (GB:Q9M439;GB:O80598); similar to ATBCAT-3/BCAT3 (BRANCHED-CHAIN AMINOTRANSFERASE 3) [Arabidopsis thalia…	GFP
AT1G10370	ATGSTU17/ERD9/GST30/GST30B (EARLY-RESPONSIVE TO DEHYDRATION 9); glutathione transferase similar to ATGSTU18 (GLUTATHIONE S-TRANSFERASE 29), glutathione transferase [Arabidopsis thaliana] (TAIR:AT1G10360.1); similar to unknown [Populus trichocarpa] (GB:ABK95417.1); contains InterPro domain Thioredoxin-like fold (InterPro:IPR012336); contains InterPro domain Glutathione S-transferase, C-terminal-li…	50%+ MS
AT1G10500	ATCPISCA (CHLOROPLAST-LOCALIZED ISCA-LIKE PROTEIN); structural molecule Involved in chloroplast Fe-S cluster assembly. Located in the chloroplast stroma. Expressed preferentially in green tissues. Identical to Iron-sulfur assembly protein IscA, chloroplast precursor (ISCA) [Arabidopsis Thaliana] (GB:Q9XIK3;GB:Q6NM99); similar to hesB-like domain-containing protein [Arabidopsis thaliana] (TAIR:AT5…	experimental + predicted
AT1G10510	EMB2004 (EMBRYO DEFECTIVE 2004); protein binding similar to RANGAP1 (RAN GTPASE ACTIVATING PROTEIN 1), RAN GTPase activator [Arabidopsis thaliana] (TAIR:AT3G63130.1); similar to unnamed protein product [Vitis vinifera] (GB:CAO40939.1); contains InterPro domain Leucine-rich repeat; (InterPro:IPR001611)	experimental + predicted
[truncated: 2,291 more rows]

## Sheet: Transcription factors
AGI code	Description	RARTF	AGRIS	DATF	PlnTFDB				Transcription factor sources: present in 2 or more TF databases (compiled by Mitsuda et al., 2009)
[truncated: 1,983 more rows]
